# Supplementary material for: Tirzepatide after intensive lifestyle intervention in adults with overweight or obesity: the SURMOUNT-3 phase 3 trial
Source: PubMed Central journal article supplement (PMC10667099; doi:10.1038/s41591-023-02597-w), 2023-10-15
Supplement: 41591_2023_2597_MOESM1_ESM.pdf [file 41591_2023_2597_MOESM1_ESM.pdf]

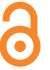

# **Tirzepatide after intensive lifestyle intervention in adults with overweight or obesity: the SURMOUNT-3 phase 3 trial**

---

In the format provided by the authors and unedited

## ***Contents***

List of Investigators

Protocol and Statistical Analysis Plan

## List of Investigators

1. Dr. Patricia Mabel Castaño MD, Instituto Médico Especializado (IME), Ciudad Autónoma de Buenos Aires, Argentina
2. Dr. Franklin Hector Abalos MD, Sanatorio Norte, Santiago del Estero, Argentina
3. Dr. Martin Horacio Koretzky MD, GLENNY CORP, Ciudad Autónoma de Buenos Aires, Argentina
4. Dr. Federico Carlos Perez Manghi MD, Centro de Investigaciones Metabólicas (CINME), Ciudad Autónoma de Buenos Aires, Argentina
5. Dr. Susana Salzberg MD, Instituto Centenario, Ciudad Autónoma de Buenos Aires, Argentina
6. Dr. Lucas Lisandro Gutnisky MD, Stat Research S.A., Ciudad Autónoma de Buenos Aires, Argentina
7. Dr. Diego Aizenberg MD, Centro Médico Viamonte, Ciudad Autónoma de Buenos Aires, Argentina
8. Dr. Alejandro Chertkoff MD, CEMEDIAB, Ciudad Autónoma de Buenos Aires, Argentina
9. Dr. Silvia Ines Orio MD, INVESTIGACIONES MEDICAS IMOBA SRL, Ciudad Autónoma de Buenos Aires, Argentina
10. Dr. Bruno Halpern MD, PhD, BR Trials - Ensaio Clínicos e Consultoria, São Paulo, Brazil
11. Dr. Joselita França de Siqueira Bodart MD, IBPClin - Instituto Brasil de Pesquisa Clínica, Rio de Janeiro, Brazil
12. Dr. Luis Augusto Tavares Russo MD, PhD, IBPClin - Instituto Brasil de Pesquisa Clínica, Rio de Janeiro, Brazil

13. Dr. Breno Balabem Alves MD, CEPIC - Centro Paulista de Investigação Clínica, São Paulo, Brazil
14. Dr. Camila Pitanga Calil Salim MD, CEDOES, Vitória, Espírito Santo, Brazil
15. Dr. Denise Reis Franco MD, CPCLIN, São Paulo, Brazil
16. Prof. Rosangela Rea MD, Quanta Diagnóstico e Terapia, Curitiba, Paraná, Brazil
17. Dr. Gustavo Akerman Augusto MD, CPQuali Pesquisa Clínica, São Paulo, Brazil
18. Dr. Silmara Aparecida de Oliveira Leite MD, PhD, Cline Research Center, Curitiba, Paraná, Brazil
19. Dr. Camila L Farrow MD, The National Diabetes & Obesity Research Institute, Biloxi, MS, United States
20. Dr. George Hartley Freeman MD, Health Research of Hampton Roads, Inc., Newport News, VA, United States
21. Dr. Angel Luis Comulada Rivera MD, Advanced Clinical Research, LLC, Bayamon, PR, United States
22. Dr. Klara Klein MD, PhD, University of North Carolina Medical Center, Chapel Hill, NC, United States
23. Dr. Sriram Machineni MD, University of North Carolina Medical Center, Chapel Hill, NC, United States
24. Dr. Adil Fatakia MD, Tandem Clinical Research, LLC, Marrero, LA, United States
25. Dr. Mark T Leibowitz MD, National Research Institute (NRI) - Santa Ana, Santa Ana, CA, United States
26. Dr. Joseph Soufer MD, Chase Medical Research, LLC, Waterbury, CT, United States
27. Dr. Subha T Clarke MD, Chase Medical Research, LLC, Waterbury, CT, United States

28. NA James H Bergthold MD, Summit Research Network, Portland, OR, United States
29. Dr. Barry Scott Horowitz MD, Metabolic Research Institute, Inc., West Palm Beach, FL,  
United States
30. Dr. Hanid Audish DO, Encompass Clinical Research, Spring Valley, CA, United States
31. Dr. Jeffrey Hooper DO, MultiCare Institute for Research & Innovation, Tacoma, WA,  
United States
32. Dr. Daniel K Storey MD, American Health Network of Indiana, LLC , Avon, IN, United  
States
33. Dr. George Mitchell Cornett MD, American Health Network of Indiana, LLC , Franklin,  
IN, United States
34. Dr. Gitanjali Srivastava MD, Vanderbilt Health One Hundred Oaks, Nashville, TN,  
United States
35. Dr. Rizwana H Mohseni DO, Catalina Research Institute, LLC, Montclair, CA, United  
States
36. Dr. Jeffrey G Geohas MD, Evanston Premier Healthcare Research LLC, Skokie, IL,  
United States
37. Dr. Ramon Ortiz-Carrasquillo MD, Manati Center for Clinical Research, Manati, PR,  
United States
38. Dr. Ronald Keith Mayfield MD, Tribe Clinical Research, LLC, Greenville, SC, United  
States
39. Dr. Elizabeth A Barranco-Santana MD, Ponce Medical School Foundation Inc., Ponce,  
PR, United States
40. Dr. Damaris Vega MD, Juno Research, Houston, TX, United States

41. Dr. Helen L Stacey MD, Diablo Clinical Research, Inc., Walnut Creek, CA, United States
42. Dr. Alexander Vance Murray MD, PharmQuest Life Sciences, LLC, Greensboro, NC,  
United States
43. Dr. Betsy Palal MD, Palm Research Center Sunset, Las Vegas, NV, United States
44. Dr. Michelle Welch MD, Consano Clinical Research, LLC, Shavano Park, TX, United  
States
45. Dr. Michael J Dunn MD, Quality Clinical Research, Omaha, NE, United States
46. Dr. David Gregory True DO, Clinvest Research LLC, Springfield, MO, United States
47. Dr. Sumana Gangi MD, Southern Endocrinology Associates, Mesquite, TX, United States
48. Dr. Julio Rosenstock MD, Velocity Clinical Research, Dallas, Dallas, TX, United States
49. Dr. Thomas A Wadden PhD, Penn Medicine: University of Pennsylvania Health System,  
Philadelphia, PA, United States
50. Dr. Ariana M Chao PhD, University of Pennsylvania, Philadelphia, PA, United States
51. Dr. Juan Pablo Frias MD, Velocity Clinical Research, Westlake, Los Angeles, CA, United  
States
52. Dr. Lisa Connery MD, Alliance for Multispecialty Research, LLC, Norman, OK, United  
States
53. Dr. Lon D Lynn DO, Clinical Research of West Florida, Tampa, FL, United States
54. Dr. Gary W Soucie MD, Elite Clinical Trials, Rexburg, ID, United States
55. Dr. Jason M Haffizulla MD, Precision Clinical Research, Sunrise, FL, United States
56. Dr. Matthew Gilruth Davis MD, Rochester Clinical Research, Inc., Rochester, NY, United  
States
57. Dr. Thomas Blevins MD, Texas Diabetes Endocrinology, Austin, TX, United States

58. Dr. Kerem Ozer MD, Texas Diabetes Endocrinology, Austin, TX, United States
59. Dr. Kamalpreet Singh MD, Texas Diabetes Endocrinology, Austin, TX, United States
60. Dr. Andrew P Brockmyre MD, Texas Diabetes & Endocrinology, PA, Bristol, TN, United States
61. Dr. Lazaro D Nunez MD, New Horizon Research Center, Miami, FL, United States
62. Dr. Jeffrey Bruce Rosen MD, AMR Miami, Coral Gables, FL, United States
63. Dr. Gary W Soucie MD, Elite Clinical Trials, BLACKFOOT, ID, United States
64. Dr. Stanley H Hsia MD, Velocity Clinical Research, Huntington Park, Huntington Park, CA, United States
65. Dr. Robert Detweiler DO, Detweiler Family Medicine & Associates, Lansdale, PA, United States
66. Dr. Michael Cox MD, Cotton O'Neil Clinical Research Center, Topeka, KS, United States
67. Dr. Katherine Willingham MD, Cotton O'Neil Clinical Research Center, Topeka, KS, United States
68. Dr. Raman S Purighalla MD, Preferred Primary Care Physicians, Preferred Clinical Research-St. Clair, Pittsburgh, PA, United States
69. Dr. David J Butuk MD, Solaris Clinical Research, Meridian, ID, United States

## Title Page

### Confidential Information

The information contained in this document is confidential and is intended for the use of clinical investigators. It is the property of Eli Lilly and Company or its subsidiaries and should not be copied by or distributed to persons not involved in the clinical investigation of tirzepatide (LY3298176), unless such persons are bound by a confidentiality agreement with Eli Lilly and Company or its subsidiaries.

**Note to Regulatory Authorities:** This document may contain protected personal data and/or commercially confidential information exempt from public disclosure. Eli Lilly and Company requests consultation regarding release/redaction prior to any public release. In the United States, this document is subject to Freedom of Information Act (FOIA) Exemption 4 and may not be reproduced or otherwise disseminated without the written approval of Eli Lilly and Company or its subsidiaries.

**Protocol Title:** Efficacy and Safety of Tirzepatide Once Weekly versus Placebo After an Intensive Lifestyle Program in Participants without Type 2 Diabetes who have Obesity or are Overweight with Weight-Related Comorbidities: A Randomized, Double-Blind, Placebo-Controlled Trial (SURMOUNT-3)

**Protocol Number:** I8F-MC-GPHM

**Amendment number:** This is the initial protocol.

**Compound:** LY3298176

**Study Phase:** 3

**Short Title:** Effect of Tirzepatide versus Placebo after Intensive Lifestyle Program (SURMOUNT-3)

**Acronym:** SURMOUNT-3

**Sponsor Name:** Eli Lilly and Company

**Legal Registered Address:** Indianapolis, Indiana USA 46285

**Regulatory Agency Identifier Number(s)**

IND: **PPD**

**Approval Date:** Protocol Electronically Signed and Approved by Lilly on date provided below.

Approval Date: 19-Nov-2020 GMT



**Medical Monitor Name and Contact Information will be provided separately.**

## Table of Contents

|           |                                                                                                  |           |
|-----------|--------------------------------------------------------------------------------------------------|-----------|
| <b>1.</b> | <b>Protocol Summary .....</b>                                                                    | <b>6</b>  |
| 1.1.      | Synopsis .....                                                                                   | 6         |
| 1.2.      | Schema .....                                                                                     | 11        |
| 1.3.      | Schedule of Activities (SoA) .....                                                               | 12        |
| <b>2.</b> | <b>Introduction .....</b>                                                                        | <b>18</b> |
| 2.1.      | Study Rationale .....                                                                            | 18        |
| 2.2.      | Background .....                                                                                 | 19        |
| 2.3.      | Benefit/Risk Assessment .....                                                                    | 20        |
| <b>3.</b> | <b>Objectives and Endpoints.....</b>                                                             | <b>21</b> |
| <b>4.</b> | <b>Study Design .....</b>                                                                        | <b>23</b> |
| 4.1.      | Overall Design.....                                                                              | 23        |
| 4.1.1.    | Overview of Study Periods .....                                                                  | 23        |
| 4.1.2.    | Study Procedures .....                                                                           | 27        |
| 4.2.      | Scientific Rationale for Study Design .....                                                      | 28        |
| 4.3.      | Justification for Dose.....                                                                      | 29        |
| 4.4.      | End of Study Definition.....                                                                     | 30        |
| <b>5.</b> | <b>Study Population .....</b>                                                                    | <b>31</b> |
| 5.1.      | Inclusion Criteria .....                                                                         | 31        |
| 5.2.      | Exclusion Criteria.....                                                                          | 33        |
| 5.3.      | Lifestyle Considerations .....                                                                   | 37        |
| 5.3.1.    | Meals and Dietary Restrictions .....                                                             | 37        |
| 5.3.2.    | Physical Activity .....                                                                          | 38        |
| 5.4.      | Screen Failures .....                                                                            | 39        |
| <b>6.</b> | <b>Study Intervention.....</b>                                                                   | <b>40</b> |
| 6.1.      | Study Intervention(s) Administered .....                                                         | 40        |
| 6.1.1.    | Medical Devices .....                                                                            | 40        |
| 6.2.      | Preparation/Handling/Storage/Accountability .....                                                | 41        |
| 6.3.      | Measures to Minimize Bias: Randomization and Blinding .....                                      | 41        |
| 6.4.      | Study Intervention Compliance.....                                                               | 42        |
| 6.5.      | Concomitant Therapy .....                                                                        | 42        |
| 6.6.      | Dose Modification .....                                                                          | 43        |
| 6.6.1.    | Tirzepatide .....                                                                                | 43        |
| 6.6.2.    | Management of Participants with Gastrointestinal Symptoms .....                                  | 43        |
| 6.7.      | Intervention after the End of the Study.....                                                     | 43        |
| <b>7.</b> | <b>Discontinuation of Study Intervention and Participant<br/>Discontinuation/Withdrawal.....</b> | <b>44</b> |
| 7.1.      | Discontinuation of Study Intervention .....                                                      | 44        |
| 7.1.1.    | Temporary Discontinuation .....                                                                  | 47        |
| 7.2.      | Participant Discontinuation/Withdrawal from the Study .....                                      | 47        |
| 7.2.1.    | Participant Disposition and Timing of Safety Follow-Up .....                                     | 49        |
| 7.2.2.    | Discontinuation of Inadvertently Enrolled Participants .....                                     | 50        |

|            |                                                                             |           |
|------------|-----------------------------------------------------------------------------|-----------|
| 7.3.       | Lost to Follow up .....                                                     | 50        |
| <b>8.</b>  | <b>Study Assessments and Procedures .....</b>                               | <b>51</b> |
| 8.1.       | Efficacy Assessments .....                                                  | 51        |
| 8.1.1.     | Primary Efficacy Assessments .....                                          | 51        |
| 8.1.2.     | Secondary Efficacy Assessments .....                                        | 51        |
| 8.1.3.     | Patient-Reported Outcomes Assessments.....                                  | 51        |
| 8.2.       | Safety Assessments .....                                                    | 53        |
| 8.2.1.     | Physical Examinations .....                                                 | 53        |
| 8.2.2.     | Vital Signs.....                                                            | 53        |
| 8.2.3.     | Electrocardiograms .....                                                    | 53        |
| 8.2.4.     | Clinical Safety Laboratory Assessments .....                                | 54        |
| 8.2.5.     | Safety Monitoring.....                                                      | 55        |
| 8.2.6.     | Depression, Suicidal Ideation and Behavior Risk Monitoring.....             | 57        |
| 8.3.       | Adverse Events, Serious Adverse Events, and Product<br>Complaints .....     | 57        |
| 8.3.1.     | Timing and Mechanism for Collecting Events .....                            | 58        |
| 8.3.2.     | Special Safety Topics .....                                                 | 60        |
| 8.4.       | Treatment of Overdose .....                                                 | 65        |
| 8.5.       | Pharmacokinetics.....                                                       | 65        |
| 8.6.       | Pharmacodynamics.....                                                       | 65        |
| 8.7.       | Genetics .....                                                              | 65        |
| 8.8.       | Biomarkers.....                                                             | 66        |
| 8.9.       | Immunogenicity Assessments.....                                             | 66        |
| 8.10.      | Health Economics.....                                                       | 67        |
| <b>9.</b>  | <b>Statistical Considerations .....</b>                                     | <b>68</b> |
| 9.1.       | Statistical Hypotheses.....                                                 | 68        |
| 9.2.       | Sample Size Determination.....                                              | 68        |
| 9.3.       | Populations for Analyses .....                                              | 69        |
| 9.4.       | Statistical Analyses.....                                                   | 69        |
| 9.4.1.     | General Considerations.....                                                 | 69        |
| 9.4.2.     | Treatment Group Comparability .....                                         | 70        |
| 9.4.3.     | Efficacy Analyses .....                                                     | 71        |
| 9.4.4.     | Safety Analyses .....                                                       | 72        |
| 9.4.5.     | Pharmacokinetic/Pharmacodynamic Analyses .....                              | 73        |
| 9.4.6.     | Evaluation of Immunogenicity.....                                           | 73        |
| 9.4.7.     | Other Analyses .....                                                        | 74        |
| 9.5.       | Interim Analyses.....                                                       | 74        |
| 9.6.       | Data Monitoring Committee (DMC).....                                        | 74        |
| <b>10.</b> | <b>Supporting Documentation and Operational Considerations .....</b>        | <b>75</b> |
| 10.1.      | Appendix 1: Regulatory, Ethical, and Study Oversight<br>Considerations..... | 75        |
| 10.1.1.    | Regulatory and Ethical Considerations.....                                  | 75        |
| 10.1.2.    | Informed Consent Process .....                                              | 75        |
| 10.1.3.    | Data Protection.....                                                        | 76        |
| 10.1.4.    | Committees Structure .....                                                  | 76        |

|            |                                                                                                                                                            |            |
|------------|------------------------------------------------------------------------------------------------------------------------------------------------------------|------------|
| 10.1.5.    | Dissemination of Clinical Study Data .....                                                                                                                 | 76         |
| 10.1.6.    | Data Quality Assurance .....                                                                                                                               | 77         |
| 10.1.7.    | Source Documents.....                                                                                                                                      | 78         |
| 10.1.8.    | Study and Site Start and Closure.....                                                                                                                      | 78         |
| 10.1.9.    | Publication Policy.....                                                                                                                                    | 79         |
| 10.2.      | Appendix 2: Clinical Laboratory Tests.....                                                                                                                 | 80         |
| 10.3.      | Appendix 3: Laboratory Assessments for Hypersensitivity<br>Events .....                                                                                    | 83         |
| 10.4.      | Appendix 4: Adverse Events: Definitions and Procedures for<br>Recording, Evaluating, Follow-up, and Reporting.....                                         | 85         |
| 10.4.1.    | Definition of AE .....                                                                                                                                     | 85         |
| 10.4.2.    | Definition of SAE.....                                                                                                                                     | 86         |
| 10.4.3.    | Definition of Product Complaint .....                                                                                                                      | 87         |
| 10.4.4.    | Recording and Follow-Up of AE and/or SAE and Product<br>Complaints .....                                                                                   | 87         |
| 10.4.5.    | Reporting of SAEs.....                                                                                                                                     | 89         |
| 10.4.6.    | Regulatory Reporting Requirements .....                                                                                                                    | 90         |
| 10.5.      | Appendix 5: Contraceptive Guidance and Collection of<br>Pregnancy Information .....                                                                        | 91         |
| 10.6.      | Appendix 6: Liver Safety: Suggested Actions and Follow-up<br>Assessments .....                                                                             | 95         |
| 10.7.      | Appendix 7: Protocol GPHM Standardized Protocols for the<br>Measurement of Height, Weight, Waist Circumference, Vital<br>Signs and Electrocardiogram ..... | 97         |
| 10.8.      | Appendix 8: Suggested Visit Structure.....                                                                                                                 | 99         |
| 10.9.      | Appendix 9: Management of Gastrointestinal Symptoms.....                                                                                                   | 100        |
| 10.10.     | Appendix 10: Provisions for Changes in Study Conduct During<br>Exceptional Circumstances.....                                                              | 101        |
| 10.11.     | Appendix 11: Abbreviations .....                                                                                                                           | 105        |
| <b>11.</b> | <b>References .....</b>                                                                                                                                    | <b>110</b> |

## 1. Protocol Summary

### 1.1. Synopsis

**Protocol Title:** Efficacy and Safety of Tirzepatide Once Weekly versus Placebo After an Intensive Lifestyle Program in Participants without Type 2 Diabetes who have Obesity or are Overweight with Weight-Related Comorbidities: A Randomized, Double-Blind, Placebo-Controlled Trial (SURMOUNT-3)

**Short Title:** Effect of Tirzepatide versus Placebo after Intensive Lifestyle Program (SUMROUNT-3)

#### **Rationale:**

Obesity is a chronic disease and its increasing prevalence is a public health concern associated with rising incidence of Type 2 diabetes mellitus (T2DM), increased risk for premature death, and increased risk for some cancers (American Medical Association [AMA] 2013; Council on Science and Public Health 2013; Lauby-Secretan et al. 2016). The cornerstone of obesity treatment is lifestyle-based therapy combining reduced-calorie diet, physical activity, and behavioral counseling (NHLBI 2000; Jensen et al. 2014; Garvey et al. 2016). Evidence-based clinical approaches to caloric restriction include moderate energy deficits of 500 to 750 kcal/day based on calculation of an individual's energy needs or more intensive low-calorie diets (LCDs) with gender-specific energy intake targets of 1200 to 1800 kcal/day. Ad libitum approaches involving restriction or elimination of particular foods without specific energy targets may also be used (Jensen et al. 2014; Garvey et al. 2016).

Lifestyle interventions lead to 5 to 10% body weight loss, which has been shown to reduce obesity-related cardiovascular risk factors, and in some cases improve health-related quality of life (Mertens and Van Gaal 2000; Knowler et al. 2002; Jensen et al. 2014; Kolotkin and Andersen 2017). However, diet- and exercise-induced weight loss is not maintained in 80% of patients, in part due to metabolic adaptations that promote regain in response to caloric deficits (Leibel et al. 1995; Sumithran et al. 2011; Doucet et al. 2018). Moreover, greater weight losses can maximize metabolic and health-related quality of life benefits and may be required to realize clinically meaningful improvements in other obesity-related comorbidities such as sleep apnea, nonalcoholic steatohepatitis, and cardiovascular disease (Garvey et al. 2016; Kolotkin and Anderson 2017; Ryan and Yockey 2017).

There is widespread consensus that pharmacotherapy for weight management should only be used as an adjunct to lifestyle-based approaches (NHLBI 2000; Jensen et al. 2014; Garvey et al. 2016). There seems to be less clarity, however, on when and in whom obesity treatment should be advanced from lifestyle-based monotherapy to lifestyle plus medication combination therapy. While some guidelines recommend pharmacotherapy only after diet and exercise fail to achieve weight loss over 6 months (NHLBI 2000), others add that it should also be considered if initial weight loss is not maintained over time (Jensen et al. 2014), and still others imply that even responders to diet and exercise may benefit from additional weight loss with medications (Garvey et al. 2016).

The gut incretin hormones, glucose-dependent insulintropic polypeptide (GIP) and glucagon-like peptide-1 (GLP-1), are secreted after meal ingestion and mediate the incretin effect. Both hormones have effects on endocrine cells in the pancreas, increasing insulin biosynthesis and secretion, and modifying glucagon secretion (Skow et al. 2016). Based on these properties, several GLP-1 receptor (GLP-1R) agonists have been approved for pharmacological treatment of T2DM (Tomlinson et al. 2016).

In addition to its pancreatic effects, GLP-1R activation decreases gut motility, slows gastric emptying, and promotes satiety (presumably through a combination of GLP-1R activation in the central and peripheral nervous systems), thereby regulating food intake and body weight (Baggio and Drucker 2007). The US Food and Drug Administration and the European Medicines Agency approved the GLP-1R agonist liraglutide for the treatment of overweight and obesity (SAXENDA® package insert, 2014; SAXENDA summary of product characteristics, 2015).

Preclinical data indicate that GIP also exerts effects on appetite regulation and food intake, on adipose tissue, and on peripheral energy metabolism. Although studies evaluating effects of GIP on body weight have yielded equivocal results, GIP receptor (GIPR) activation may play a role in body weight regulation and targeting both the GLP-1R and the GIPR simultaneously could potentially result in additive or synergistic effects of the 2 incretins on body weight (Coskun et al. 2018).

Tirzepatide is a 39-amino acid synthetic peptide dual GIPR and GLP-1R agonist. Its structure is based on the GIP sequence and includes a C20 fatty diacid moiety (Coskun et al. 2018). It is administered once-weekly (QW) by subcutaneous (SC) injection.

As a dual GIP/GLP-1R agonist, tirzepatide could exceed the efficacy of selective GLP-1R agonists by recruiting metabolically active tissues not targeted by selective GLP-1R agonists (for example, adipose tissue as indicated by the observation of increased energy utilization) (Müller et al. 2018) and has the potential to reach higher efficacy in target tissues that express both GIPR and GLP-1R. Therefore, tirzepatide has the potential to impact several aspects of energy regulation and to be a treatment of overweight and obesity.

In a 26-week Phase 2 study in patients with T2DM, tirzepatide 10 mg and 15 mg doses produced statistically significant and clinically relevant weight loss compared to placebo and compared to the GLP-1 R agonist, dulaglutide. Tirzepatide is subsequently being evaluated in Phase 3 studies in patients with obesity for its effects on weight loss as an adjunct to a 500 kcal/day deficit diet and increased physical activity. There is a need to better understand the benefits of tirzepatide after a more intensive lifestyle program, especially as current recommendations vary with regards to when to prescribe pharmacotherapy to diet and exercise responders and goals of treatment in such patients may range from promoting maintenance to augmenting the initial response.

Study 18F-MC-GPHM (GPHM; SURMOUNT-3) is a Phase 3, multicenter, randomized, parallel-arm, double-blind, placebo-controlled, 84-week study that will investigate the effects of treatment with maximum tolerated dose (MTD) of tirzepatide (10 mg or 15 mg QW), compared with placebo, on body weight management in study participants who do not have T2DM and have obesity (body mass index [BMI]  $\geq 30$  kg/m<sup>2</sup>) or are overweight (BMI  $\geq 27$  kg/m<sup>2</sup>) with at least 1 weight-related comorbid condition and achieved  $\geq 5.0\%$  weight loss after a 12-week lead-in period with an intensive lifestyle modification program.

**Objectives and Endpoints**

| Objectives                                                                                                                                                                                                                                                                                                            | Endpoints                                                                                                                                                                                                                                                                                                                                                                                                                                                                                                                                                                                               |
|-----------------------------------------------------------------------------------------------------------------------------------------------------------------------------------------------------------------------------------------------------------------------------------------------------------------------|---------------------------------------------------------------------------------------------------------------------------------------------------------------------------------------------------------------------------------------------------------------------------------------------------------------------------------------------------------------------------------------------------------------------------------------------------------------------------------------------------------------------------------------------------------------------------------------------------------|
| <b>Primary</b>                                                                                                                                                                                                                                                                                                        |                                                                                                                                                                                                                                                                                                                                                                                                                                                                                                                                                                                                         |
| <p>To demonstrate that tirzepatide MTD is superior to placebo from randomization for the following (measured at 72 weeks):</p> <ul style="list-style-type: none"> <li>• Percent change in body weight AND</li> <li>• Proportion of participants with <math>\geq 5\%</math> body weight reduction</li> </ul>           | <ul style="list-style-type: none"> <li>• Mean percent change in body weight</li> <li>• Percentage of study participants who achieve <math>\geq 5\%</math> body weight reduction</li> </ul>                                                                                                                                                                                                                                                                                                                                                                                                              |
| <b>Key Secondary (controlled for type I error)</b>                                                                                                                                                                                                                                                                    |                                                                                                                                                                                                                                                                                                                                                                                                                                                                                                                                                                                                         |
| <p>To demonstrate that tirzepatide MTD is superior to placebo from randomization for the following (measured at 72 weeks):</p> <ul style="list-style-type: none"> <li>• Maintaining body weight reduction achieved during the 12-week lead-in period</li> <li>• Body weight</li> <li>• Waist circumference</li> </ul> | <ul style="list-style-type: none"> <li>• Percentage of study participants who maintain <math>\geq 80\%</math> of the body weight lost during the 12-week lead-in period</li> <li>• Percentage of study participants who achieve: <ul style="list-style-type: none"> <li>○ <math>\geq 10\%</math> body weight reduction</li> <li>○ <math>\geq 15\%</math> body weight reduction</li> </ul> </li> <li>• Mean change in waist circumference (cm)</li> </ul>                                                                                                                                                |
| <b>Additional Secondary</b>                                                                                                                                                                                                                                                                                           |                                                                                                                                                                                                                                                                                                                                                                                                                                                                                                                                                                                                         |
| <p>To demonstrate that tirzepatide MTD is superior to placebo from randomization for the following (measured at 72 weeks):</p> <ul style="list-style-type: none"> <li>• Body weight and BMI</li> <li>• Blood pressure</li> <li>• Lipid parameters</li> </ul>                                                          | <ul style="list-style-type: none"> <li>• Mean change in body weight (kg)</li> <li>• Mean change in BMI (<math>\text{kg}/\text{m}^2</math>)</li> <li>• Mean change in <ul style="list-style-type: none"> <li>○ systolic blood pressure (mmHg)</li> <li>○ diastolic blood pressure (mmHg)</li> </ul> </li> <li>• Mean change in: <ul style="list-style-type: none"> <li>○ Total cholesterol (mg/dL)</li> <li>○ HDL-cholesterol (mg/dL)</li> <li>○ LDL-cholesterol (mg/dL)</li> <li>○ VLDL-cholesterol (mg/dL)</li> <li>○ Triglycerides (mg/dL)</li> <li>○ Free fatty acids (mg/dL)</li> </ul> </li> </ul> |

| Objectives                                                                                                                                                                                                                                                                                                                                                   | Endpoints                                                                                                                                                                                                                                                                                                                                                                                                                                                                                                                                                                                                                                                |
|--------------------------------------------------------------------------------------------------------------------------------------------------------------------------------------------------------------------------------------------------------------------------------------------------------------------------------------------------------------|----------------------------------------------------------------------------------------------------------------------------------------------------------------------------------------------------------------------------------------------------------------------------------------------------------------------------------------------------------------------------------------------------------------------------------------------------------------------------------------------------------------------------------------------------------------------------------------------------------------------------------------------------------|
| <ul style="list-style-type: none"> <li>• Glycemic control</li> <li>• Insulin</li> <li>• Patient-reported outcomes</li> </ul> <p>To demonstrate that tirzepatide MTD is superior to placebo from Visit 2 for the following (measured at 72 weeks):</p> <ul style="list-style-type: none"> <li>• Body weight and BMI</li> <li>• Waist circumference</li> </ul> | <ul style="list-style-type: none"> <li>• Mean change in               <ul style="list-style-type: none"> <li>○ fasting glucose (mg/dL)</li> <li>○ HbA1c (%)</li> </ul> </li> <li>• Mean change in fasting insulin (pmol/L)</li> <li>• Mean change in               <ul style="list-style-type: none"> <li>○ SF-36v2 acute form Physical Functioning domain score</li> <li>○ IWQOL-Lite-CT Physical Function composite score</li> </ul> </li> <li>• Mean change in absolute body weight (kg)</li> <li>• Mean percent change in body weight</li> <li>• Mean change in BMI (kg/m<sup>2</sup>)</li> <li>• Mean change in waist circumference (cm)</li> </ul> |

Abbreviations: BMI = body mass index; HbA1c = hemoglobin A1c; HDL = high-density lipoprotein; IWQOL-Lite-CT = Impact of Weight on Quality of Life-Lite Clinical Trials Version; LDL = low-density lipoprotein; MTD = maximum tolerated dose; SF-36v2 acute form = Short Form-36 Version 2 Health Survey acute form; VLDL = very low-density lipoprotein.

## Overall Design

Study GPHM is a Phase 3, multicenter, randomized, parallel-arm, double-blind, placebo-controlled, 84-week study that will investigate the effects of treatment with tirzepatide MTD (10 mg or 15 mg QW), compared with placebo, on body weight management in study participants who have obesity (BMI  $\geq 30$  kg/m<sup>2</sup>) or are overweight (BMI  $\geq 27$  kg/m<sup>2</sup>) with at least 1 weight-related comorbid condition and achieved  $\geq 5.0\%$  weight loss after a 12-week lead-in period with an intensive lifestyle modification program.

Randomization at the end of the 12-week lead-in period will be stratified by country, sex, and percent weight loss at the end of lead-in (<10% versus  $\geq 10\%$ ).

**Disclosure Statement:** This is a study including 2 parallel treatment arms (tirzepatide MTD versus placebo) that is participant- and investigator-blinded.



**Number of Participants:**

Approximately 1100 participants will be screened and 800 participants enrolled into the 12-week intensive lifestyle modification lead-in period in order to get approximately 600 participants who will be randomized in a 1:1 ratio to tirzepatide MTD (300 participants) or placebo (300 participants). An upper limit of 70% enrollment of women will be used to ensure a sufficiently large sample of men.

**Intervention Groups and Duration:**

Study participants will be randomized in a 1:1 ratio (tirzepatide MTD QW and placebo QW), stratified by country, sex and percent weight loss at the end of lead-in period (<10% versus  $\geq 10\%$ ).

Study GPHM will consist of 4 periods: a 2-week screening period; a 12-week lead-in period during which participants undertake an intensive lifestyle modification program to achieve  $\geq 5.0\%$  body weight loss; a 72-week double-blind placebo-controlled dose escalation and treatment period; and a 4-week safety follow-up period.

**Data Monitoring Committee: No**

### 1.2. Schema

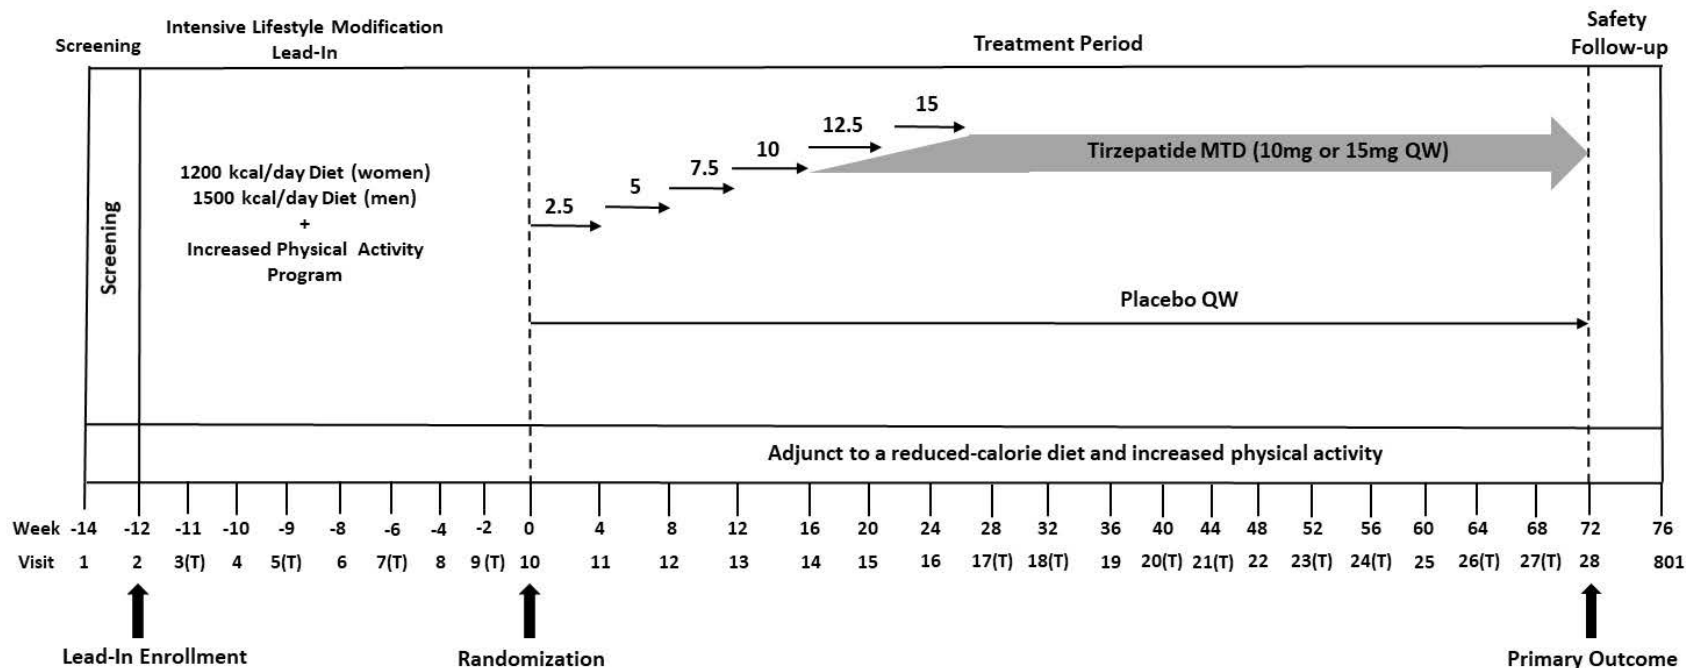

Abbreviations: MTD = maximum tolerated dose, QW = once weekly, (T) = telephone visit.

### 1.3. Schedule of Activities (SoA)

The Schedule of Activities described below should be followed for all participants enrolled in Study GPHM. However, for those participants whose participation in this study is affected by exceptional circumstances (such as pandemics or natural disasters), please refer to Section 10.10 (Appendix 10) for additional guidance.

| Visit                                                                           | 1                                                                                                                                                                                                                                                                                                      | 2   | 3   | 4   | 5  | 6  | 7  | 8  | 9  | 10 | 11 | 12 | 13 | 14 | 15 | 16 | 17 | 18 | 19 | 20 | 21 | 22 | 23 | 24 | 25 | 26 | 27 | 28 | 99 | ED | 801            |
|---------------------------------------------------------------------------------|--------------------------------------------------------------------------------------------------------------------------------------------------------------------------------------------------------------------------------------------------------------------------------------------------------|-----|-----|-----|----|----|----|----|----|----|----|----|----|----|----|----|----|----|----|----|----|----|----|----|----|----|----|----|----|----|----------------|
| Week of Treatment                                                               | -14                                                                                                                                                                                                                                                                                                    | -12 | -11 | -10 | -9 | -8 | -6 | -4 | -2 | 0  | 4  | 8  | 12 | 16 | 20 | 24 | 28 | 32 | 36 | 40 | 44 | 48 | 52 | 56 | 60 | 64 | 68 | 72 | 72 |    | 4 wks Post TxP |
| Allowable Deviation (days)                                                      |                                                                                                                                                                                                                                                                                                        | ±3  | ±3  | ±3  | ±3 | ±3 | ±3 | ±3 | ±3 | ±3 | ±3 | ±3 | ±3 | ±3 | ±3 | ±3 | ±3 | ±3 | ±3 | ±3 | ±3 | ±3 | ±3 | ±3 | ±3 | ±3 | ±3 | ±7 | ±7 |    | ±3             |
| Fasting Visit                                                                   | X                                                                                                                                                                                                                                                                                                      | X   |     | X   |    | X  |    | X  |    | X  | X  | X  | X  | X  | X  | X  |    | X  |    | X  |    | X  |    | X  |    | X  |    | X  | X  | X  | X              |
| Telephone Visit                                                                 |                                                                                                                                                                                                                                                                                                        |     | X   |     | X  |    | X  |    | X  |    |    |    |    |    |    |    | X  | X  |    | X  | X  |    | X  | X  |    | X  | X  |    |    |    |                |
| Lifestyle Program Instruction only                                              |                                                                                                                                                                                                                                                                                                        |     | X   |     | X  |    | X  |    | X  |    |    |    |    |    |    |    |    |    |    |    |    |    |    |    |    |    |    |    |    |    |                |
| Informed consent                                                                | X                                                                                                                                                                                                                                                                                                      |     |     |     |    |    |    |    |    |    |    |    |    |    |    |    |    |    |    |    |    |    |    |    |    |    |    |    |    |    |                |
| Inclusion and exclusion criteria review                                         | X                                                                                                                                                                                                                                                                                                      | X   |     |     |    |    |    |    |    |    |    |    |    |    |    |    |    |    |    |    |    |    |    |    |    |    |    |    |    |    |                |
| Preexisting conditions and medical history, including relevant surgical history | X                                                                                                                                                                                                                                                                                                      |     |     |     |    |    |    |    |    |    |    |    |    |    |    |    |    |    |    |    |    |    |    |    |    |    |    |    |    |    |                |
|                                                                                 | Medical history includes assessment of preexisting conditions (for example, history of gallbladder disease, cardiovascular disease, and medullary thyroid carcinoma) and substance usage (such as alcohol and tobacco).                                                                                |     |     |     |    |    |    |    |    |    |    |    |    |    |    |    |    |    |    |    |    |    |    |    |    |    |    |    |    |    |                |
| Concomitant medications                                                         | X                                                                                                                                                                                                                                                                                                      | X   |     | X   |    | X  |    | X  |    | X  | X  | X  | X  | X  | X  | X  | X  | X  | X  | X  | X  | X  | X  | X  | X  | X  | X  | X  | X  | X  | X              |
| Adverse events and product complaints                                           | X                                                                                                                                                                                                                                                                                                      | X   |     | X   |    | X  |    | X  |    | X  | X  | X  | X  | X  | X  | X  | X  | X  | X  | X  | X  | X  | X  | X  | X  | X  | X  | X  | X  | X  | X              |
| <b>Physical Evaluation or Clinical Assessments</b>                              |                                                                                                                                                                                                                                                                                                        |     |     |     |    |    |    |    |    |    |    |    |    |    |    |    |    |    |    |    |    |    |    |    |    |    |    |    |    |    |                |
| Height                                                                          | X                                                                                                                                                                                                                                                                                                      |     |     |     |    |    |    |    |    |    |    |    |    |    |    |    |    |    |    |    |    |    |    |    |    |    |    |    |    |    |                |
| Weight                                                                          | X                                                                                                                                                                                                                                                                                                      | X   |     | X   |    | X  |    | X  |    | X  | X  | X  | X  | X  | X  | X  |    | X  |    |    | X  |    |    | X  |    |    | X  | X  | X  | X  |                |
|                                                                                 | Weight measurements should be obtained per the detailed protocol guidance in Section 10.7. Body weight must be measured in the fasting state. If the participant is not fasting, the participant should be called in for a new visit within the visit window to have the fasting body weight measured. |     |     |     |    |    |    |    |    |    |    |    |    |    |    |    |    |    |    |    |    |    |    |    |    |    |    |    |    |    |                |
| Waist circumference                                                             |                                                                                                                                                                                                                                                                                                        | X   |     | X   |    | X  |    | X  |    | X  | X  | X  | X  | X  | X  | X  |    | X  |    |    | X  |    |    | X  |    |    | X  | X  | X  | X  |                |
| Vital Signs (systolic and diastolic blood pressure, pulse rate)                 | X                                                                                                                                                                                                                                                                                                      | X   |     | X   |    | X  |    | X  |    | X  | X  | X  | X  | X  | X  | X  |    | X  |    |    | X  |    |    | X  |    |    | X  |    | X  | X  |                |
|                                                                                 | Vital sign measurements should be taken before obtaining an ECG tracing and before collection of blood samples for laboratory testing, per the instructions in Section 10.7.                                                                                                                           |     |     |     |    |    |    |    |    |    |    |    |    |    |    |    |    |    |    |    |    |    |    |    |    |    |    |    |    |    |                |
| Physical examination                                                            | X                                                                                                                                                                                                                                                                                                      |     |     |     |    |    |    |    |    |    |    |    |    |    |    |    |    |    |    |    |    |    |    |    |    |    |    |    |    |    |                |
| Electrocardiogram                                                               |                                                                                                                                                                                                                                                                                                        | X   |     |     |    |    |    |    |    | X  |    |    |    |    |    | X  |    |    |    |    |    |    |    |    |    |    |    | X  |    | X  | X              |

| Visit                                                                                                                                                                               | 1                                                                                                                                                                                                                                                                                                                                                                                                                                                                                                                                                                           | 2   | 3   | 4   | 5  | 6  | 7  | 8  | 9  | 10 | 11 | 12 | 13 | 14 | 15 | 16 | 17 | 18 | 19 | 20 | 21 | 22 | 23 | 24 | 25 | 26 | 27 | 28 | 99 | ED | 801            |
|-------------------------------------------------------------------------------------------------------------------------------------------------------------------------------------|-----------------------------------------------------------------------------------------------------------------------------------------------------------------------------------------------------------------------------------------------------------------------------------------------------------------------------------------------------------------------------------------------------------------------------------------------------------------------------------------------------------------------------------------------------------------------------|-----|-----|-----|----|----|----|----|----|----|----|----|----|----|----|----|----|----|----|----|----|----|----|----|----|----|----|----|----|----|----------------|
| Week of Treatment                                                                                                                                                                   | -14                                                                                                                                                                                                                                                                                                                                                                                                                                                                                                                                                                         | -12 | -11 | -10 | -9 | -8 | -6 | -4 | -2 | 0  | 4  | 8  | 12 | 16 | 20 | 24 | 28 | 32 | 36 | 40 | 44 | 48 | 52 | 56 | 60 | 64 | 68 | 72 | 72 |    | 4 wks Post TxP |
| Allowable Deviation (days)                                                                                                                                                          |                                                                                                                                                                                                                                                                                                                                                                                                                                                                                                                                                                             | ±3  | ±3  | ±3  | ±3 | ±3 | ±3 | ±3 | ±3 | ±3 | ±3 | ±3 | ±3 | ±3 | ±3 | ±3 | ±3 | ±3 | ±3 | ±3 | ±3 | ±3 | ±3 | ±3 | ±3 | ±3 | ±3 | ±7 | ±7 |    | ±3             |
| Fasting Visit                                                                                                                                                                       | X                                                                                                                                                                                                                                                                                                                                                                                                                                                                                                                                                                           | X   |     | X   |    | X  |    | X  |    | X  | X  | X  | X  | X  | X  |    |    | X  |    |    | X  |    |    | X  |    |    | X  | X  | X  | X  |                |
| Telephone Visit                                                                                                                                                                     |                                                                                                                                                                                                                                                                                                                                                                                                                                                                                                                                                                             |     | X   |     | X  |    | X  |    | X  |    |    |    |    |    |    |    |    | X  | X  |    | X  | X  |    | X  | X  |    | X  | X  |    |    |                |
| Lifestyle Program Instruction only                                                                                                                                                  |                                                                                                                                                                                                                                                                                                                                                                                                                                                                                                                                                                             |     | X   |     | X  |    | X  |    | X  |    |    |    |    |    |    |    |    |    |    |    |    |    |    |    |    |    |    |    |    |    |                |
| ECG measurements should be obtained per the instructions in Section 10.7. ECGs should be collected at least 30 minutes prior to collection of blood samples for laboratory testing. |                                                                                                                                                                                                                                                                                                                                                                                                                                                                                                                                                                             |     |     |     |    |    |    |    |    |    |    |    |    |    |    |    |    |    |    |    |    |    |    |    |    |    |    |    |    |    |                |
| <b>Participant Education and Assessment</b>                                                                                                                                         |                                                                                                                                                                                                                                                                                                                                                                                                                                                                                                                                                                             |     |     |     |    |    |    |    |    |    |    |    |    |    |    |    |    |    |    |    |    |    |    |    |    |    |    |    |    |    |                |
| Lifestyle Program Instruction                                                                                                                                                       |                                                                                                                                                                                                                                                                                                                                                                                                                                                                                                                                                                             | X   | X   | X   | X  | X  | X  | X  | X  | X  |    |    | X  |    |    | X  |    |    | X  |    |    | X  |    |    | X  |    |    | X  |    | X  |                |
|                                                                                                                                                                                     | Counselling on diet and exercise, to be performed by a dietician or equivalent qualified delegate, to include calculation of individualized energy requirement and behavior modification strategies to change dietary composition and amount of physical activity (See Section 5.3 for details). The Lifestyle Program Instruction may be delivered on a separate day from the rest of that visit's study procedures but must occur within the visit window. After Week 0 (Visit 10, randomization), the remaining Lifestyle Program Instruction may be delivered by phone. |     |     |     |    |    |    |    |    |    |    |    |    |    |    |    |    |    |    |    |    |    |    |    |    |    |    |    |    |    |                |
| Review diet and exercise goals                                                                                                                                                      |                                                                                                                                                                                                                                                                                                                                                                                                                                                                                                                                                                             | X   | X   | X   | X  | X  | X  | X  | X  | X  | X  | X  | X  | X  | X  | X  | X  | X  | X  | X  | X  | X  | X  | X  | X  | X  | X  | X  | X  | X  | X              |
|                                                                                                                                                                                     | All training should be repeated as needed to encourage participant compliance. Study personnel to provide reinforcement and encouragement for lifestyle modifications.                                                                                                                                                                                                                                                                                                                                                                                                      |     |     |     |    |    |    |    |    |    |    |    |    |    |    |    |    |    |    |    |    |    |    |    |    |    |    |    |    |    |                |
| Injection training with autoinjector demonstration device                                                                                                                           |                                                                                                                                                                                                                                                                                                                                                                                                                                                                                                                                                                             |     |     |     |    |    |    |    |    | X  |    |    |    |    |    |    |    |    |    |    |    |    |    |    |    |    |    |    |    |    |                |
| <b>Participant Diary (paper)</b>                                                                                                                                                    |                                                                                                                                                                                                                                                                                                                                                                                                                                                                                                                                                                             |     |     |     |    |    |    |    |    |    |    |    |    |    |    |    |    |    |    |    |    |    |    |    |    |    |    |    |    |    |                |
| Dispense diary, instruct in use                                                                                                                                                     |                                                                                                                                                                                                                                                                                                                                                                                                                                                                                                                                                                             |     |     |     |    |    |    |    |    | X  | X  | X  | X  | X  | X  | X  |    |    | X  |    |    | X  |    |    | X  |    |    |    |    |    |                |
|                                                                                                                                                                                     | All training should be repeated as needed to encourage participant compliance.                                                                                                                                                                                                                                                                                                                                                                                                                                                                                              |     |     |     |    |    |    |    |    |    |    |    |    |    |    |    |    |    |    |    |    |    |    |    |    |    |    |    |    |    |                |
| Diary review                                                                                                                                                                        |                                                                                                                                                                                                                                                                                                                                                                                                                                                                                                                                                                             |     |     |     |    |    |    |    |    | X  | X  | X  | X  | X  | X  | X  | X  | X  | X  | X  | X  | X  | X  | X  | X  | X  | X  | X  | X  | X  |                |
| <b>Patient Reported Outcomes</b>                                                                                                                                                    |                                                                                                                                                                                                                                                                                                                                                                                                                                                                                                                                                                             |     |     |     |    |    |    |    |    |    |    |    |    |    |    |    |    |    |    |    |    |    |    |    |    |    |    |    |    |    |                |
| PGIs                                                                                                                                                                                |                                                                                                                                                                                                                                                                                                                                                                                                                                                                                                                                                                             | X   |     |     |    |    |    |    |    | X  |    |    |    |    |    |    |    |    |    |    |    |    |    |    |    |    |    |    |    | X  | X              |
| SF-36 v2, acute form                                                                                                                                                                |                                                                                                                                                                                                                                                                                                                                                                                                                                                                                                                                                                             | X   |     |     |    |    |    |    |    | X  |    |    |    |    |    |    |    |    |    |    |    |    |    |    |    |    |    |    |    | X  | X              |
| IWQOL-Lite-CT                                                                                                                                                                       |                                                                                                                                                                                                                                                                                                                                                                                                                                                                                                                                                                             | X   |     |     |    |    |    |    |    | X  |    |    |    |    |    |    |    |    |    |    |    |    |    |    |    |    |    |    |    | X  | X              |

| Visit                                          | 1                                                                                                                                                                                                                                                                                                                             | 2   | 3   | 4   | 5  | 6  | 7  | 8  | 9  | 10 | 11 | 12 | 13 | 14 | 15 | 16 | 17 | 18 | 19 | 20 | 21 | 22 | 23 | 24 | 25 | 26 | 27 | 28 | 99 | ED | 801            |   |
|------------------------------------------------|-------------------------------------------------------------------------------------------------------------------------------------------------------------------------------------------------------------------------------------------------------------------------------------------------------------------------------|-----|-----|-----|----|----|----|----|----|----|----|----|----|----|----|----|----|----|----|----|----|----|----|----|----|----|----|----|----|----|----------------|---|
| Week of Treatment                              | -14                                                                                                                                                                                                                                                                                                                           | -12 | -11 | -10 | -9 | -8 | -6 | -4 | -2 | 0  | 4  | 8  | 12 | 16 | 20 | 24 | 28 | 32 | 36 | 40 | 44 | 48 | 52 | 56 | 60 | 64 | 68 | 72 | 72 |    | 4 wks Post TxP |   |
| Allowable Deviation (days)                     |                                                                                                                                                                                                                                                                                                                               | ±3  | ±3  | ±3  | ±3 | ±3 | ±3 | ±3 | ±3 | ±3 | ±3 | ±3 | ±3 | ±3 | ±3 | ±3 | ±3 | ±3 | ±3 | ±3 | ±3 | ±3 | ±3 | ±3 | ±3 | ±3 | ±3 | ±7 | ±7 |    | ±3             |   |
| Fasting Visit                                  | X                                                                                                                                                                                                                                                                                                                             | X   |     | X   |    | X  |    | X  |    | X  | X  | X  | X  | X  | X  |    |    | X  |    |    | X  |    |    | X  |    |    | X  | X  | X  | X  |                |   |
| Telephone Visit                                |                                                                                                                                                                                                                                                                                                                               |     | X   |     | X  |    | X  |    | X  |    |    |    |    |    |    |    | X  | X  |    | X  | X  |    | X  | X  |    | X  | X  |    |    |    |                |   |
| Lifestyle Program Instruction only             |                                                                                                                                                                                                                                                                                                                               |     | X   |     | X  |    | X  |    | X  |    |    |    |    |    |    |    |    |    |    |    |    |    |    |    |    |    |    |    |    |    |                |   |
| EQ-5D-5L                                       |                                                                                                                                                                                                                                                                                                                               | X   |     |     |    |    |    |    |    | X  |    |    |    |    |    |    |    |    |    |    |    |    |    |    |    |    |    |    | X  |    | X              |   |
| <b>Mental Health Questionnaires</b>            |                                                                                                                                                                                                                                                                                                                               |     |     |     |    |    |    |    |    |    |    |    |    |    |    |    |    |    |    |    |    |    |    |    |    |    |    |    |    |    |                |   |
| PHQ-9                                          | X                                                                                                                                                                                                                                                                                                                             |     |     |     |    |    |    |    |    | X  |    |    | X  |    |    | X  |    |    | X  |    |    | X  |    |    | X  |    |    | X  | X  | X  | X              |   |
|                                                | The PHQ-9 is self-administered and should be completed <i>after</i> assessment of adverse events.                                                                                                                                                                                                                             |     |     |     |    |    |    |    |    |    |    |    |    |    |    |    |    |    |    |    |    |    |    |    |    |    |    |    |    |    |                |   |
| C-SSRS (Baseline/Screening Version)            | X                                                                                                                                                                                                                                                                                                                             |     |     |     |    |    |    |    |    |    |    |    |    |    |    |    |    |    |    |    |    |    |    |    |    |    |    |    |    |    |                |   |
|                                                | The C-SSRS should be administered <i>after</i> assessment of adverse events. For this study, the C-SSRS is adapted for the assessment of the ideation and behavior categories only. The Intensity of Ideation and Lethality of Behavior sections are removed.                                                                 |     |     |     |    |    |    |    |    |    |    |    |    |    |    |    |    |    |    |    |    |    |    |    |    |    |    |    |    |    |                |   |
| C-SSRS (Since Last Visit Version)              |                                                                                                                                                                                                                                                                                                                               | X   |     | X   |    | X  |    | X  |    | X  | X  | X  | X  | X  | X  | X  | X  | X  | X  | X  | X  | X  | X  | X  | X  | X  | X  | X  | X  | X  | X              |   |
|                                                | The C-SSRS should be administered <i>after</i> assessment of adverse events and capture information since most recent C-SSRS administration. For this study, the C-SSRS is adapted for the assessment of the ideation and behavior categories only. The Intensity of Ideation and Lethality of Behavior sections are removed. |     |     |     |    |    |    |    |    |    |    |    |    |    |    |    |    |    |    |    |    |    |    |    |    |    |    |    |    |    |                |   |
| Self-Harm Supplement Form                      | X                                                                                                                                                                                                                                                                                                                             | X   |     | X   |    | X  |    | X  |    | X  | X  | X  | X  | X  | X  | X  | X  | X  | X  | X  | X  | X  | X  | X  | X  | X  | X  | X  | X  | X  | X              |   |
|                                                | The Self-Harm Supplement Form should be administered <i>after</i> assessment of adverse events.                                                                                                                                                                                                                               |     |     |     |    |    |    |    |    |    |    |    |    |    |    |    |    |    |    |    |    |    |    |    |    |    |    |    |    |    |                |   |
| Self-Harm Follow-up Form                       | X                                                                                                                                                                                                                                                                                                                             | X   |     | X   |    | X  |    | X  |    | X  | X  | X  | X  | X  | X  | X  | X  | X  | X  | X  | X  | X  | X  | X  | X  | X  | X  | X  | X  | X  | X              |   |
|                                                | The Self-Harm Follow-up Form is only required if triggered by the Self-Harm Supplement Form, per instructions in the form.                                                                                                                                                                                                    |     |     |     |    |    |    |    |    |    |    |    |    |    |    |    |    |    |    |    |    |    |    |    |    |    |    |    |    |    |                |   |
| <b>Laboratory Tests and Sample Collections</b> |                                                                                                                                                                                                                                                                                                                               |     |     |     |    |    |    |    |    |    |    |    |    |    |    |    |    |    |    |    |    |    |    |    |    |    |    |    |    |    |                |   |
| Hematology                                     | X                                                                                                                                                                                                                                                                                                                             |     |     |     |    |    |    |    |    | X  |    |    | X  |    |    | X  |    |    |    |    |    |    |    |    |    |    |    |    | X  |    | X              | X |
| HbA1c                                          | X                                                                                                                                                                                                                                                                                                                             |     |     |     |    |    |    |    |    | X  |    |    | X  |    |    | X  |    |    | X  |    |    | X  |    |    | X  |    |    | X  |    | X  | X              |   |

| Visit                                                          | 1                                                                                                                                                                                                                                                                                                                                                                                                       | 2   | 3   | 4   | 5  | 6  | 7  | 8  | 9  | 10 | 11 | 12 | 13 | 14 | 15 | 16 | 17 | 18 | 19 | 20 | 21 | 22 | 23 | 24 | 25 | 26 | 27 | 28 | 99 | ED | 801            |
|----------------------------------------------------------------|---------------------------------------------------------------------------------------------------------------------------------------------------------------------------------------------------------------------------------------------------------------------------------------------------------------------------------------------------------------------------------------------------------|-----|-----|-----|----|----|----|----|----|----|----|----|----|----|----|----|----|----|----|----|----|----|----|----|----|----|----|----|----|----|----------------|
| Week of Treatment                                              | -14                                                                                                                                                                                                                                                                                                                                                                                                     | -12 | -11 | -10 | -9 | -8 | -6 | -4 | -2 | 0  | 4  | 8  | 12 | 16 | 20 | 24 | 28 | 32 | 36 | 40 | 44 | 48 | 52 | 56 | 60 | 64 | 68 | 72 | 72 |    | 4 wks Post TxP |
| Allowable Deviation (days)                                     |                                                                                                                                                                                                                                                                                                                                                                                                         | ±3  | ±3  | ±3  | ±3 | ±3 | ±3 | ±3 | ±3 | ±3 | ±3 | ±3 | ±3 | ±3 | ±3 | ±3 | ±3 | ±3 | ±3 | ±3 | ±3 | ±3 | ±3 | ±3 | ±3 | ±3 | ±3 | ±7 | ±7 |    | ±3             |
| Fasting Visit                                                  | X                                                                                                                                                                                                                                                                                                                                                                                                       | X   |     | X   |    | X  |    | X  |    | X  | X  | X  | X  | X  | X  | X  |    |    | X  |    |    | X  |    |    | X  |    |    | X  | X  | X  | X              |
| Telephone Visit                                                |                                                                                                                                                                                                                                                                                                                                                                                                         |     | X   |     | X  |    | X  |    | X  |    |    |    |    |    |    |    |    | X  | X  |    | X  | X  |    | X  | X  |    | X  | X  |    |    |                |
| Lifestyle Program Instruction only                             |                                                                                                                                                                                                                                                                                                                                                                                                         |     | X   |     | X  |    | X  |    | X  |    |    |    |    |    |    |    |    |    |    |    |    |    |    |    |    |    |    |    |    |    |                |
| Chemistry panel (includes Cr for eGFR calculation and glucose) | X                                                                                                                                                                                                                                                                                                                                                                                                       |     |     |     |    |    |    |    |    | X  |    |    | X  |    |    | X  |    |    | X  |    |    | X  |    |    | X  |    |    | X  |    | X  | X              |
|                                                                | The CKD-EPI equation will be used by the central lab to estimate and report eGFR.                                                                                                                                                                                                                                                                                                                       |     |     |     |    |    |    |    |    |    |    |    |    |    |    |    |    |    |    |    |    |    |    |    |    |    |    |    |    |    |                |
| Insulin                                                        | X                                                                                                                                                                                                                                                                                                                                                                                                       |     |     |     |    |    |    |    |    | X  |    |    | X  |    |    | X  |    |    | X  |    |    | X  |    |    | X  |    |    | X  |    | X  | X              |
| C-peptide                                                      | X                                                                                                                                                                                                                                                                                                                                                                                                       |     |     |     |    |    |    |    |    | X  |    |    | X  |    |    | X  |    |    | X  |    |    | X  |    |    | X  |    |    | X  |    | X  | X              |
| Lipid panel                                                    | X                                                                                                                                                                                                                                                                                                                                                                                                       |     |     |     |    |    |    |    |    | X  |    |    |    |    |    | X  |    |    |    |    |    |    |    |    |    |    |    | X  |    | X  | X              |
| Free fatty acids                                               | X                                                                                                                                                                                                                                                                                                                                                                                                       |     |     |     |    |    |    |    |    | X  |    |    |    |    |    | X  |    |    |    |    |    |    |    |    |    |    |    | X  |    | X  | X              |
| Serum pregnancy                                                | X                                                                                                                                                                                                                                                                                                                                                                                                       |     |     |     |    |    |    |    |    | X  |    |    |    |    |    |    |    |    |    |    |    |    |    |    |    |    |    |    |    |    |                |
|                                                                | For women of childbearing potential only.                                                                                                                                                                                                                                                                                                                                                               |     |     |     |    |    |    |    |    |    |    |    |    |    |    |    |    |    |    |    |    |    |    |    |    |    |    |    |    |    |                |
| Urine pregnancy (local)                                        |                                                                                                                                                                                                                                                                                                                                                                                                         |     |     |     |    |    |    |    |    | X  |    |    | X  |    |    | X  |    |    | X  |    |    | X  |    |    | X  |    |    | X  |    | X  |                |
|                                                                | A urine pregnancy test must be performed at Visit 10 with the result available prior to first injection of study drug(s) for women of childbearing potential only. Additional pregnancy tests (beyond those required by the SoA) should be performed at any time during the trial if a menstrual period is missed, there is clinical suspicion of pregnancy, or as required by local law or regulation. |     |     |     |    |    |    |    |    |    |    |    |    |    |    |    |    |    |    |    |    |    |    |    |    |    |    |    |    |    |                |
| Follicle-stimulating hormone test                              | X                                                                                                                                                                                                                                                                                                                                                                                                       |     |     |     |    |    |    |    |    |    |    |    |    |    |    |    |    |    |    |    |    |    |    |    |    |    |    |    |    |    |                |
|                                                                | Follicle-stimulating hormone test is to be performed at Visit 1 for postmenopausal women at least 40 years of age with an intact uterus, not on hormone therapy, and who have had spontaneous amenorrhea for more than 1 year without an alternative medical cause.                                                                                                                                     |     |     |     |    |    |    |    |    |    |    |    |    |    |    |    |    |    |    |    |    |    |    |    |    |    |    |    |    |    |                |
| Calcitonin                                                     | X                                                                                                                                                                                                                                                                                                                                                                                                       |     |     |     |    |    |    |    |    | X  |    |    | X  |    |    | X  |    |    |    |    |    |    |    |    |    |    |    | X  |    | X  | X              |
| Pancreatic amylase                                             | X                                                                                                                                                                                                                                                                                                                                                                                                       |     |     |     |    |    |    |    |    | X  |    |    | X  |    |    | X  |    |    |    |    |    |    |    |    |    |    |    | X  |    | X  | X              |
| Lipase                                                         | X                                                                                                                                                                                                                                                                                                                                                                                                       |     |     |     |    |    |    |    |    | X  |    |    | X  |    |    | X  |    |    |    |    |    |    |    |    |    |    |    | X  |    | X  | X              |
| Urinary albumin/creatinine ratio                               | X                                                                                                                                                                                                                                                                                                                                                                                                       |     |     |     |    |    |    |    |    | X  |    |    |    |    |    | X  |    |    |    |    |    |    |    |    |    |    |    | X  |    | X  | X              |
| Cystatin-c                                                     | X                                                                                                                                                                                                                                                                                                                                                                                                       |     |     |     |    |    |    |    |    | X  |    |    |    |    |    | X  |    |    |    |    |    |    |    |    |    |    |    | X  |    | X  | X              |

| Visit                                                                                                                                                                                                                                                                                                      | 1   | 2   | 3   | 4   | 5  | 6  | 7  | 8  | 9  | 10 | 11 | 12 | 13 | 14 | 15 | 16 | 17 | 18 | 19 | 20 | 21 | 22 | 23 | 24 | 25 | 26 | 27 | 28 | 99 | ED | 801            |   |
|------------------------------------------------------------------------------------------------------------------------------------------------------------------------------------------------------------------------------------------------------------------------------------------------------------|-----|-----|-----|-----|----|----|----|----|----|----|----|----|----|----|----|----|----|----|----|----|----|----|----|----|----|----|----|----|----|----|----------------|---|
| Week of Treatment                                                                                                                                                                                                                                                                                          | -14 | -12 | -11 | -10 | -9 | -8 | -6 | -4 | -2 | 0  | 4  | 8  | 12 | 16 | 20 | 24 | 28 | 32 | 36 | 40 | 44 | 48 | 52 | 56 | 60 | 64 | 68 | 72 | 72 |    | 4 wks Post TxP |   |
| Allowable Deviation (days)                                                                                                                                                                                                                                                                                 |     | ±3  | ±3  | ±3  | ±3 | ±3 | ±3 | ±3 | ±3 | ±3 | ±3 | ±3 | ±3 | ±3 | ±3 | ±3 | ±3 | ±3 | ±3 | ±3 | ±3 | ±3 | ±3 | ±3 | ±3 | ±3 | ±3 | ±7 | ±7 |    | ±3             |   |
| Fasting Visit                                                                                                                                                                                                                                                                                              | X   | X   |     | X   |    | X  |    | X  |    | X  | X  | X  | X  | X  | X  | X  |    |    | X  |    |    | X  |    |    | X  |    |    | X  | X  | X  | X              |   |
| Telephone Visit                                                                                                                                                                                                                                                                                            |     |     | X   |     | X  |    | X  |    | X  |    |    |    |    |    |    |    | X  | X  |    | X  | X  |    | X  | X  |    | X  | X  |    |    |    |                |   |
| Lifestyle Program Instruction only                                                                                                                                                                                                                                                                         |     |     | X   |     | X  |    | X  |    | X  |    |    |    |    |    |    |    |    |    |    |    |    |    |    |    |    |    |    |    |    |    |                |   |
| Thyroid stimulating hormone                                                                                                                                                                                                                                                                                | X   |     |     |     |    |    |    |    |    |    |    |    |    |    |    |    |    |    |    |    |    |    |    |    |    |    |    |    |    |    |                |   |
| Immunogenicity (includes PK sample)                                                                                                                                                                                                                                                                        |     |     |     |     |    |    |    |    |    | X  | X  |    | X  |    |    | X  |    |    |    |    |    |    | X  |    |    |    |    |    | X  |    | X              | X |
| In the event of systemic drug hypersensitivity reactions (immediate or nonimmediate), additional unscheduled samples should be collected as detailed in Section 8.3.2.7 (Hypersensitivity Reactions). Immunogenicity samples and PK samples for immunogenicity must be taken prior to drug administration. |     |     |     |     |    |    |    |    |    |    |    |    |    |    |    |    |    |    |    |    |    |    |    |    |    |    |    |    |    |    |                |   |
| <b>Stored Samples</b>                                                                                                                                                                                                                                                                                      |     |     |     |     |    |    |    |    |    |    |    |    |    |    |    |    |    |    |    |    |    |    |    |    |    |    |    |    |    |    |                |   |
| Pharmacogenetic sample                                                                                                                                                                                                                                                                                     |     |     |     |     |    |    |    |    |    | X  |    |    |    |    |    |    |    |    |    |    |    |    |    |    |    |    |    |    |    |    |                |   |
| Nonpharmacogenetic sample                                                                                                                                                                                                                                                                                  | X   |     |     |     |    |    |    |    |    | X  |    |    | X  |    |    | X  |    |    |    |    |    | X  |    |    |    |    |    |    | X  |    | X              | X |
| <b>Randomization and Dosing</b>                                                                                                                                                                                                                                                                            |     |     |     |     |    |    |    |    |    |    |    |    |    |    |    |    |    |    |    |    |    |    |    |    |    |    |    |    |    |    |                |   |
| Randomization                                                                                                                                                                                                                                                                                              |     |     |     |     |    |    |    |    |    | X  |    |    |    |    |    |    |    |    |    |    |    |    |    |    |    |    |    |    |    |    |                |   |
| Dispense study intervention(s)                                                                                                                                                                                                                                                                             |     |     |     |     |    |    |    |    |    | X  | X  | X  | X  | X  | X  | X  |    |    | X  |    |    | X  |    |    | X  |    |    |    |    |    |                |   |
| Observe participant administer study drug intervention                                                                                                                                                                                                                                                     |     |     |     |     |    |    |    |    |    | X  |    |    |    |    |    |    |    |    |    |    |    |    |    |    |    |    |    |    |    |    |                |   |
| Participants should administer their first dose of study drug at the end of Visit 10, after other study procedures are completed.                                                                                                                                                                          |     |     |     |     |    |    |    |    |    |    |    |    |    |    |    |    |    |    |    |    |    |    |    |    |    |    |    |    |    |    |                |   |
| Participant returns study drug intervention and injection supplies                                                                                                                                                                                                                                         |     |     |     |     |    |    |    |    |    |    | X  | X  | X  | X  | X  | X  |    |    | X  |    |    | X  |    |    | X  |    |    |    | X  |    | X              |   |
| Assess study intervention(s) compliance                                                                                                                                                                                                                                                                    |     |     |     |     |    |    |    |    |    |    | X  | X  | X  | X  | X  | X  | X  | X  | X  | X  | X  | X  | X  | X  | X  | X  | X  | X  | X  | X  | X              | X |

Abbreviations: CKD-EPI = Chronic Kidney Disease-Epidemiology; C-SSRS = Columbia Suicide Severity Rating Scale; Cr = creatinine; ED = early discontinuation; eGFR = estimated glomerular filtration rate; HbA1c = hemoglobin A1c; IWQOL-Lite-CT = Impact of Weight on Quality of Life-Lite-Clinical Trials Version; PGIs = Patient Global Impression of status for physical activity; PHQ-9 = Patient Health Questionnaire-9; PK = pharmacokinetics; SF-36v2 acute form = Short Form-36 Version 2 Health Survey acute form; SoA = schedule of activities; TxP = treatment period; wks = weeks.

Note:

- The visit date is determined in relation to the date of Visit 2 for the lead-in period and Visit 10 (randomization) for the treatment period.
- For all office visits, remind participants to report to the site in a fasting condition, after a period of approximately 8 hours without eating, drinking (except water), or any significant physical activity. Since some screening procedures need to be completed in the fasting state, Visit 1 may be conducted over more than 1 day to ensure necessary conditions are met. Eligible participants enter a lifestyle modification lead-in period, during which they receive instruction in an intensive dietary (1200 kcal/day for women or 1500 kcal/day for men) and exercise program to achieve a  $\geq 5.0\%$  body weight loss.
- On Lifestyle Program Instruction Only Visits, all spontaneously reported adverse events by participant will be documented by the investigator and any qualified designee.
- Visit 10 assessments must be completed before processing in the interactive web-response system (IWRS).
- Visit 99 is only applicable to participants who discontinue the double-blind study treatment prematurely (after Week 0 and before Week 72) and decline to complete the remaining scheduled study visits. Participants wanting to discontinue the study treatment after randomization and before Week 72 will be asked to return for Visit 99 (72 weeks  $\pm 7$  days after Visit 10) primarily for body weight measurement and assessment of adverse events. If the participant is unwilling to attend Visit 99, it should be documented in the participant medical record that the participant has refused to attend.
- Participants who are unable or unwilling to continue the study intensive lifestyle intervention (during lead-in period) or study drug intervention (during treatment period) for any reason will perform an ED visit. If the participant is discontinuing during an unscheduled visit or a scheduled visit, that visit should be performed as an ED visit.
- Visit 801 (safety follow-up visit) should be performed 4 weeks after the last visit of the participant's treatment period (after randomization, see Section [4.1.1.2.3](#))



## 2. Introduction

Obesity is a chronic disease and its increasing prevalence is a public health concern associated with rising incidence of type 2 diabetes mellitus (T2DM), increased risk for premature death, and increased risk for some cancers (American Medical Association [AMA] 2013; Council on Science and Public Health 2013; Lauby-Secretan et al. 2016). The cornerstone of obesity treatment is lifestyle-based therapy combining reduced-calorie diet, physical activity and behavioral counseling (NHLBI 2000; Jensen et al. 2014; Garvey et al. 2016). Evidence-based clinical approaches to caloric restriction include moderate energy deficits of 500 to 750 kcal/day based on calculation of an individual's energy needs or more intensive low-calorie diets (LCDs) with gender-specific energy intake targets of 1200 to 1800 kcal/day. Ad libitum approaches involving restriction or elimination of particular foods without specific energy targets may also be used (Jensen et al. 2014; Garvey et al. 2016).

These lifestyle interventions lead to 5 to 10% body weight loss that has been shown to reduce obesity-related cardiovascular risk factors, and in some cases improve health-related quality of life (Mertens and Van Gaal 2000; Knowler et al. 2002; Jensen et al. 2014; Kolotkin and Andersen 2017). However, diet- and exercise-induced weight loss is not maintained in 80% of patients, in part due to metabolic adaptations that promote regain in response to caloric deficits (Leibel et al. 1995; Sumithran et al. 2011; Doucet et al. 2018). Adjunctive therapies, including medications, devices, and surgical treatments, for obesity are evolving as are the clinical guidelines for the application of these therapies in the clinical management of patients with obesity.

### 2.1. Study Rationale

The gut incretin hormones, glucose-dependent insulinotropic polypeptide (GIP) and glucagon-like peptide-1 (GLP-1), are secreted after meal ingestion and mediate the incretin effect.

Both hormones have effects on endocrine cells in the pancreas, increasing insulin biosynthesis and secretion, stimulating beta-cell neogenesis and proliferation, and protecting beta cells from apoptosis. They also exert actions on alpha cells, modifying glucagon secretion (Skow et al. 2016). Based on these properties, several GLP-1 receptor (GLP-1R) agonists have been approved for pharmacological treatment of T2DM (Tomlinson et al. 2016).

In addition to its pancreatic effects, GLP-1R activation decreases gut motility, slows gastric emptying, and promotes satiety (presumably through a combination of GLP-1R activation in the central and peripheral nervous systems), thereby regulating food intake and body weight (Baggio and Drucker 2007). The US Food and Drug Administration (FDA) and the European Medicines Agency (EMA) approved the GLP-1R agonist liraglutide for the treatment of overweight and obesity (SAXENDA package insert, 2014; SAXENDA summary of product characteristics, 2015).

Preclinical data indicate that GIP also exerts effects on appetite regulation and food intake as well as on adipose tissue and peripheral energy metabolism. Although studies evaluating effects of GIP on body weight have yielded equivocal results, GIP receptor (GIPR) activation may play

a role in body weight regulation and targeting both the GLP-1R and the GIPR simultaneously could potentially result in additive or synergistic effects of the 2 incretins on body weight (Coskun et al. 2018).

Tirzepatide is a 39-amino acid synthetic peptide with agonist activity at both the GIPR and GLP-1R. Its structure is based on the GIP sequence and includes a C20 fatty diacid moiety (Coskun et al. 2018). It is administered once-weekly (QW) by subcutaneous (SC) injection. As a dual GIP/GLP-1R agonist, tirzepatide could exceed the efficacy of selective GLP-1R agonists by recruiting metabolically active tissues not targeted by selective GLP-1R agonists (for example, adipose tissue as indicated by the observation of increased energy utilization) (Müller et al. 2018) and has the potential to reach higher efficacy in target tissues that express both GIPR and GLP-1R. Therefore, tirzepatide has the potential to impact several aspects of energy regulation and be a treatment for overweight and obesity.

There is widespread consensus that pharmacotherapy for weight management should only be used as an adjunct to lifestyle-based approaches (NHLBI 2000; Jensen et al. 2014; Garvey et al. 2016). There seems to be less clarity, however, on when and in whom obesity treatment should be advanced from lifestyle-based monotherapy to lifestyle plus medication combination therapy. While some guidelines recommend pharmacotherapy only after diet and exercise fail to achieve weight loss over 6 months (NHLBI 2000), others add that it should also be considered if initial weight loss is not maintained over time (Jensen et al. 2014), and still others imply that even responders to diet and exercise may benefit from additional weight loss with medications (Garvey et al. 2016). There is a need to better understand the benefits of tirzepatide after initial success with lifestyle-induced weight loss, especially as current recommendations vary and goals of treatment in such patients may range from promoting maintenance to augmenting weight loss.

Study 18F-MC-GPHM is a Phase 3, multicenter, randomized, parallel-arm, double-blind, placebo-controlled, 84-week study that will investigate the effects of treatment with maximum tolerated dose (MTD) of tirzepatide (10 mg or 15 mg QW), compared with placebo, on body weight management in study participants who have obesity (body mass index [BMI]  $\geq 30$  kg/m<sup>2</sup>) or are overweight (BMI  $\geq 27$  kg/m<sup>2</sup>) with at least one weight-related comorbid condition and achieved  $\geq 5.0\%$  weight loss after a 12-week lead-in period with an intensive lifestyle modification program.

## **2.2. Background**

There remains an unmet need in the pharmacologic treatment of obesity for drugs that are safe, efficacious, and well tolerated. There are currently only a few medications FDA-approved for long-term use for the treatment of obesity that yield a placebo-adjusted average weight loss between 3% and 7% (Srivastava and Apovian 2018; FDA 2020). Although moderate weight loss of 5% to 10% in individuals with obesity/overweight has long been shown to yield significant metabolic benefits including improvements in cholesterol, blood pressure, and glucose parameters (Goldstein 1992; Wing et al. 2011), greater weight loss can maximize these benefits and may be required to realize clinically meaningful improvements in other obesity-related comorbidities such as sleep apnea, non-alcoholic steatohepatitis, and cardiovascular disease (Ryan and Yockey 2017). In addition to moderate efficacy, some centrally-acting weight-loss agents to date have had adverse neurocognitive, psychiatric or cardiovascular effects, further limiting their application in clinical practice (Srivastava and Apovian 2018).

Weight loss induced by GLP-1R agonists, while appearing to be centrally-mediated through a combination of hormonal inputs to satiety centers (van Bloemendaal et al. 2014), has not been consistently associated with changes in mental health or with potential for addiction in long-term studies conducted to establish cardiovascular safety in patients with diabetes (Marso et al. 2016a, 2016b, Gerstein et al. 2019). Tirzepatide, which is both a GLP-1R and GIPR agonist, has been associated with predominantly mild to moderate gastrointestinal (GI) adverse effects similar to currently marketed GLP-1R agonists, but has also demonstrated significant weight loss at both the 10-mg and 15-mg doses in Phase 2 studies with nearly half of the participants in each dose arm achieving  $\geq 10\%$  weight loss (Frias et al. 2018).

Tirzepatide dose selection for obesity treatment has been informed by 3 clinical trials: a Phase 1 study, Study I8F-MC-GPGA (GPGA), and 2 Phase 2 studies, Study I8F-MC-GPGB (GPGB) and I8F-MC-GPGF (GPGF).

Phase 1 Study GPGA was a combination of single-ascending dose (SAD) and multiple-ascending dose (MAD) study in healthy subjects followed by a multiple-dose study in patients with T2DM. A total of 142 participants (89 healthy subjects and 53 patients with T2DM) received at least 1 dose of treatment. Doses of tirzepatide ranged from:

- 0.25 mg to 8 mg in the SAD (with maximum tolerated dose [MTD] achieved at 5 mg) in healthy subjects,
- multiple doses in the MAD from 0.5 mg to 4.5 mg QW and titrated doses up to 10 mg QW for 4 weeks in healthy subjects, and
- multiple doses at 0.5 mg and 5 mg QW and titrated to 15 mg QW for 4 weeks in patients with T2DM.

The safety and tolerability and pharmacokinetic/pharmacodynamic (PK/PD) profiles of tirzepatide at doses and escalation regimens administered in this Phase 1 study supported further development of tirzepatide for QW dosing in patients with T2DM.

Phase 2 studies GPGB and GPGF provided initial safety, tolerability and efficacy data in the tirzepatide 1-mg to 15-mg dose-range when used in treatment of patients with T2DM. In the dose range of 5 mg to 15 mg, tirzepatide provided significantly greater reductions in hemoglobin A1c (HbA1c) and body weight compared with placebo. In addition, the 10-mg and 15-mg dose arms demonstrated significantly greater weight loss compared to the GLP-1R agonist, dulaglutide 1.5 mg QW. The most common adverse events (AEs), which were also dose-dependent, were mild-to-moderate nausea, vomiting, and diarrhea. Study GPGF showed that adjustments in the tirzepatide dose-escalation algorithm resulted in additional reductions in the frequency of GI AEs and reduced the frequency of treatment discontinuations due to GI AEs.

### **2.3. Benefit/Risk Assessment**

More detailed information about the known and expected benefits and risks and reasonably expected AEs of tirzepatide may be found in the Investigator's Brochure (IB).

### 3. Objectives and Endpoints

| Objectives                                                                                                                                                                                                                                                                                                            | Endpoints                                                                                                                                                                                                                                                                                                                                                                                                                                                                                                                                                           |
|-----------------------------------------------------------------------------------------------------------------------------------------------------------------------------------------------------------------------------------------------------------------------------------------------------------------------|---------------------------------------------------------------------------------------------------------------------------------------------------------------------------------------------------------------------------------------------------------------------------------------------------------------------------------------------------------------------------------------------------------------------------------------------------------------------------------------------------------------------------------------------------------------------|
| <b>Primary</b>                                                                                                                                                                                                                                                                                                        |                                                                                                                                                                                                                                                                                                                                                                                                                                                                                                                                                                     |
| <p>To demonstrate that tirzepatide MTD is superior to placebo from randomization for the following (measured at 72 weeks)</p> <ul style="list-style-type: none"> <li>• Percent change in body weight AND</li> <li>• Proportion of participants with <math>\geq 5\%</math> body weight reduction</li> </ul>            | <ul style="list-style-type: none"> <li>• Mean percent change in body weight</li> <li>• Percentage of study participants who achieve <math>\geq 5\%</math> body weight reduction</li> </ul>                                                                                                                                                                                                                                                                                                                                                                          |
| <b>Key Secondary (controlled for type I error)</b>                                                                                                                                                                                                                                                                    |                                                                                                                                                                                                                                                                                                                                                                                                                                                                                                                                                                     |
| <p>To demonstrate that tirzepatide MTD is superior to placebo from randomization for the following (measured at 72 weeks):</p> <ul style="list-style-type: none"> <li>• Maintaining body weight reduction achieved during the 12-week lead-in period</li> <li>• Body weight</li> <li>• Waist circumference</li> </ul> | <ul style="list-style-type: none"> <li>• Percentage of study participants who maintain <math>\geq 80\%</math> of the body weight lost during the 12-week lead-in period</li> <li>• Percentage of study participants who achieve: <ul style="list-style-type: none"> <li>○ <math>\geq 10\%</math> body weight reduction</li> <li>○ <math>\geq 15\%</math> body weight reduction</li> </ul> </li> <li>• Mean change in waist circumference (cm)</li> </ul>                                                                                                            |
| <b>Additional Secondary</b>                                                                                                                                                                                                                                                                                           |                                                                                                                                                                                                                                                                                                                                                                                                                                                                                                                                                                     |
| <p>To demonstrate that tirzepatide MTD is superior to placebo from randomization for the following (measured at 72 weeks):</p> <ul style="list-style-type: none"> <li>• Body weight and BMI</li> <li>• Blood pressure</li> <li>• Lipid parameters</li> </ul>                                                          | <ul style="list-style-type: none"> <li>• Mean change in body weight (kg)</li> <li>• Mean change in BMI (<math>\text{kg}/\text{m}^2</math>)</li> <li>• Mean change in <ul style="list-style-type: none"> <li>○ systolic blood pressure (mmHg)</li> <li>○ diastolic blood pressure (mmHg)</li> </ul> </li> <li>• Mean change in: <ul style="list-style-type: none"> <li>○ Total cholesterol (mg/dL)</li> <li>○ HDL-cholesterol (mg/dL)</li> <li>○ LDL-cholesterol (mg/dL)</li> <li>○ VLDL-cholesterol (mg/dL)</li> <li>○ Triglycerides (mg/dL)</li> </ul> </li> </ul> |

| Objectives                                                                                                                                                                                                                                                                                                                                                   | Endpoints                                                                                                                                                                                                                                                                                                                                                                                                                                                                                                                                                                                                                                                                                    |
|--------------------------------------------------------------------------------------------------------------------------------------------------------------------------------------------------------------------------------------------------------------------------------------------------------------------------------------------------------------|----------------------------------------------------------------------------------------------------------------------------------------------------------------------------------------------------------------------------------------------------------------------------------------------------------------------------------------------------------------------------------------------------------------------------------------------------------------------------------------------------------------------------------------------------------------------------------------------------------------------------------------------------------------------------------------------|
| <ul style="list-style-type: none"> <li>• Glycemic control</li> <li>• Insulin</li> <li>• Patient-reported outcomes</li> </ul> <p>To demonstrate that tirzepatide MTD is superior to placebo from Visit 2 for the following (measured at 72 weeks):</p> <ul style="list-style-type: none"> <li>• Body weight and BMI</li> <li>• Waist circumference</li> </ul> | <ul style="list-style-type: none"> <li>○ Free fatty acids (mg/dL)</li> <li>• Mean change in               <ul style="list-style-type: none"> <li>○ fasting glucose (mg/dL)</li> <li>○ HbA1c (%)</li> </ul> </li> <li>• Mean change in fasting insulin (pmol/L)</li> <li>• Mean change in               <ul style="list-style-type: none"> <li>○ SF-36v2 acute form Physical Functioning domain score</li> <li>○ IWQOL-Lite-CT Physical Function composite score</li> </ul> </li> <li>• Mean change in absolute body weight (kg)</li> <li>• Mean percent change in body weight</li> <li>• Mean change in BMI (kg/m<sup>2</sup>)</li> <li>• Mean change in waist circumference (cm)</li> </ul> |

Abbreviations: BMI = body mass index; HbA1c = hemoglobin A1c; HDL = high-density lipoprotein; IWQOL-Lite-CT = Impact of Weight on Quality of Life-Lite Clinical Trials Version; LDL = low-density lipoprotein, MTD = maximum tolerated dose; SF-36v2 acute form = Short Form-36 Version 2 Health Survey acute form; VLDL = very low-density lipoprotein.

## 4. Study Design

### 4.1. Overall Design

Study I8F-MC-GPHM is a Phase 3, multicenter, randomized, parallel-arm, double-blind placebo-controlled, 84-week study that will investigate the effects of treatment with MTD of tirzepatide (10 mg or 15 mg QW), compared with placebo, on body weight management in study participants who have obesity (BMI  $\geq 30$  kg/m<sup>2</sup>) or are overweight (BMI  $\geq 27$  kg/m<sup>2</sup>) with at least one weight-related comorbid condition and achieved  $\geq 5.0\%$  weight loss after a 12-week lead-in period with an intensive lifestyle modification program.

Study GPHM will consist of 4 periods: a 2-week screening period; a 12-week lead-in period during which participants undertake an intensive lifestyle modification program to achieve  $\geq 5.0\%$  body weight loss; a 72-week double-blind placebo-controlled treatment period (including a 20-week dose escalation period); and a 4-week safety follow-up period. Study participants who achieve at least 5.0% weight loss will be randomized in a 1:1 ratio (tirzepatide MTD QW or placebo) at the end of the lead-in period. An upper limit of 70% enrollment of women will be used to ensure a sufficiently large sample of men.

#### 4.1.1. Overview of Study Periods

##### 4.1.1.1. Visit Structure for all Office Visits

On all designated fasting office visits, study participants are required to report to the site in a fasting condition, after a period of approximately 8 hours without eating, drinking (except water), or performing any significant physical activity. If a participant is adversely affected by the fasting condition, they are allowed to eat; however, specific study procedures need to be completed while fasting. See Section 10.8 for a suggested order of activities that occurs at office visits.

##### 4.1.1.2. Main Study Period

###### 4.1.1.2.1. Screening Period

###### *Visit 1*

The purpose of screening procedures at Visit 1 is to establish initial eligibility, and to obtain blood samples for laboratory assessments needed to confirm eligibility. The participant must sign the informed consent form (ICF) before the study procedures are performed, as outlined in the SoA, Section 1.3. Since some screening procedures need to be completed in the fasting state (approximately 8 hours without eating, drinking [except water], or any significant physical activity), Visit 1 may be conducted over more than 1 day to ensure necessary conditions are met. Participants who meet all applicable inclusion criteria and none of the applicable exclusion criteria at Visit 1 will continue to Visit 2.

The Mental Health questionnaires (Patient Health Questionnaire-9 [PHQ-9], Columbia-Suicide Severity Rating Scale [C-SSRS], and C-SSRS Self-Harm Form) should be completed after the assessment for AEs.

## ***Visit 2***

At Visit 2, the screening laboratory results will be reviewed. For all participants who remain eligible, lifestyle program instruction will be provided by a dietician, or equivalent qualified delegate, for an intensive dietary and exercise program.

Patient-reported outcomes (PROs) questionnaires should be administered as early as possible, as per Suggested Visit Structure (Section 10.8). Preferred administration order is:

1. Patient Global Impression of status for physical activity (PGIs)
2. Short Form-36 version 2 Health Survey (SF-36v2) acute form
3. Impact of Weight on Quality of Life-Lite-Clinical Trials Version (IWQOL-Lite-CT)
4. EQ-5D-5L.

The Mental Health questionnaires should be completed after the assessment for AEs.

### ***4.1.1.2.2. Intensive Lifestyle Modification Lead-in Period***

During the intensive lifestyle modification lead-in period (Visits 2-10), participants will receive instruction from a dietician, or equivalent qualified delegate, according to local standards, to reduce their daily caloric energy intake to approximately

- 1200 kcal/day for women, or
- 1500 kcal/day for men

for a period of 12 weeks (Heymsfield et al. 2003). The dietary intervention may include up to 2 meal replacements per day. Participants will be encouraged to exercise on a regular basis, with a recommendation of at least 150 minutes per week of moderate intensity activity (for example, brisk walking). Participants will be counselled on behavior modification strategies to help implement and adhere to the diet and exercise recommendations. For more details see Sections 5.3.1 and 5.3.2.

Participants who have  $\geq 5.0\%$  weight loss at Visit 10 will then proceed to randomization to either tirzepatide or placebo.

Mental Health questionnaires should be completed after the assessment of AEs.

### ***4.1.1.2.3. Treatment Period***

#### ***Visit 10 (Randomization)***

At Visit 10, eligible participants will perform all required randomization study procedures (including the collection of all laboratory measures and questionnaires) prior to randomization and prior to taking the first dose of study drug. Only participants who have achieved  $\geq 5.0\%$  weight loss at Visit 10 will be randomized and continue in the study.

Participants will be provided diaries and be trained to record key study information, as appropriate.

PRO questionnaires should be administered as early as possible, as per Suggested Visit Structure (Section 10.8). Preferred administration order is:

1. PGIs

2. SF-36 v2 acute form
3. IWQOL-Lite-CT
4. EQ-5D-5L.

Mental Health questionnaires should be completed after the assessment of AEs.

Participants will receive consultation with a dietician or qualified delegate, according to local standards, to set lifestyle goals for caloric intake and physical activity (Section 5.3) during the treatment period.

Following randomization, study site personnel will demonstrate use of the autoinjector (also referred to as single-dose pen) using the provided demonstration device and observe the study participant inject the first dose of tirzepatide or placebo. The date, time and location of the first dose of study drug will be recorded on the electronic case report form (eCRF). Beginning at randomization, all participants will receive study drug according to the randomized treatment arm for the duration of the 72-week dose escalation and treatment period.

### ***End of Visit 10 to Visit 28***

During the treatment period, office visits will occur as indicated in the SoA (Section 1.3). Telephone visits will occur at 4-week intervals between the office visits starting at Visit 17.

Office visit procedures should be conducted according to the SoA (Section 1.3), and will include

- weight, waist circumference and vital signs measurements
- laboratory testing
- administration of PRO questionnaires
- collection of AEs, product complaints and concomitant medications
- Mental Health questionnaires
- review of participant diary information (to include reinforcement and compliance assessments for study drug administration and lifestyle goals)
- drug dispensing.

Patient-reported outcomes questionnaires should be administered as early as possible, as per Suggested Visit Structure (Section 10.8). Preferred administration order is the same as Visit 2.

Mental Health questionnaires should be completed after the assessment of AEs.

Dietician consultations occur every 12 weeks from Week 0 to Week 72. Study drug and injection supplies will be returned per the SoA (Section 1.3) and according to local requirements. New supplies will be dispensed as needed.

The starting dose of tirzepatide is 2.5 mg QW (or matching placebo) for 4 weeks, then the dose is increased by 2.5 mg (or matching placebo) every 4 weeks (2.5 to 5 to 7.5 to 10 to 12.5 to 15 mg) up to MTD (either 10 mg or 15 mg).



Interventions to optimize study drug tolerance and adherence may be employed throughout the study and include, but are not limited to, brief temporary interruptions and use of additional medications to manage GI symptoms (for example, nausea, vomiting, and diarrhea, see Section 6.6.2. for details).

During the first 24 weeks of the treatment period (20-week dose escalation plus 4 weeks), participants unable to tolerate 2.5 mg or 5 mg despite the above measures will be discontinued from the study drug but remain in the study for continued follow up. For participants unable to tolerate any dose escalation between 7.5 mg and 15 mg inclusive, despite the above measures, the investigator should contact Lilly to consider a dose de-escalation step with subsequent re-escalation in a blinded fashion to reach either the 10-mg or 15-mg dose as described below (only 1 cycle of dose de-escalation and re-escalation is permitted during the first 24 weeks of the treatment period):

- 7.5 mg to 5 mg, then the dose is increased by 2.5 mg every 4 weeks up to MTD (either 10 mg or 15 mg)
- 10 mg to 7.5 mg, then the dose is increased by 2.5 mg every 4 weeks up to MTD (either 10 mg or 15 mg)
- 12.5 mg to 10 mg, then the dose is increased by 2.5 mg every 4 weeks up to MTD (either 10 mg or 15 mg)
- 15 mg to 12.5 mg, then the dose is increased by 2.5 mg every 4 weeks up to MTD (either 10 mg or 15 mg)

Participants who tolerate 15 mg will continue on 15 mg as their MTD dose.

Participants who tolerate 10 mg, but do not tolerate 12.5 mg or 15 mg even after one de-escalation and re-escalation attempt, will continue on 10 mg as their MTD dose.

Participants who tolerate 12.5 mg but do not tolerate 15 mg even after 1 de-escalation and re-escalation attempt, will continue on 10 mg as their MTD dose.

Participants who do not tolerate up to 10 mg even after 1 de-escalation and re-escalation attempt, will be discontinued from the study drug but remain in the study for continued follow up.

At each of the 8 scheduled treatment period telephone visits, procedures will include

- collection of AEs, product complaints, and concomitant medications
- administration of Mental Health questionnaires, and
- review of participant diary information (to include reinforcement and compliance assessments for study drug administration and lifestyle goals).

Participants should be instructed to contact the investigative site for assistance as soon as possible if they experience any difficulties administering their study medication. Participants should also be advised about the appropriate course of action in the event that study drug is not taken at the required time (late/missing doses).

***Visit 99***

Visit 99 is only applicable to participants who discontinue the study treatment prematurely (between Visit 10 and Visit 28) and decline to complete the remaining scheduled study visits. These participants will be asked to return for Visit 99 at 72 weeks  $\pm 7$  days after randomization (Section 7.2.1). This visit is critical to ensure complete data collection for the primary endpoint.

Participants should attend this visit in the fasting state. Procedures to be completed are

- measurement of weight and waist circumference,
- listing of concomitant medications,
- assessment of AEs, and
- completion of the Mental Health questionnaires (after the AE assessment).

For participants unwilling to attend this visit, their refusal to attend should be documented in the participant medical record.

**4.1.1.2.4. *Early Discontinuation of Treatment Visit***

Participants unable or unwilling to continue the study intensive lifestyle intervention (during lead-in period) or study drug intervention (during treatment period) for any reason will perform an early discontinuation (ED) visit (Section 7.2.1). If the participant is discontinuing during an unscheduled visit or a scheduled visit, that visit should be performed as an ED visit. Procedures should be completed according to the SoA. Patient-reported outcomes questionnaires should be administered as early as possible, as per Suggested Visit Structure (Section 10.8). Administration of Mental Health questionnaires should follow assessment of AEs.

**4.1.1.3. *Safety Follow-Up Period******Visit 801***

All randomized participants are required to complete a safety follow-up visit (Visit 801), according to the SoA. Participants discontinuing the study drug early and performing an ED visit will also be asked to perform the safety follow-up visit (see Section 7.2). During the safety follow-up period, participants will not receive study drug. Participants are also required to return any remaining study diaries to the study site at the end of this period.

Visit 801 (safety follow-up visit) should be performed 4 weeks after the last visit in the treatment period (Visit 28 or Visit 99) or 4 weeks after the ED visit for randomized participants who decline to return for Visit 99.

**4.1.2. *Study Procedures***

Participants will perform study procedures listed in the SoA (Section 1.3).

Study participants will be permitted to use concomitant medications that they require during the study, except certain excluded medications (see Section 5.2) that may interfere with the assessment of efficacy and safety characteristics of the study treatments.

Study governance considerations are described in detail in Section 10.1 (Appendix 1).

## 4.2. Scientific Rationale for Study Design

Tirzepatide is a 39-amino acid synthetic peptide with agonist activity at both the GIPR and GLP-1R. Its structure is based on the GIP sequence and includes a C20 fatty diacid moiety (Coskun et al. 2018). It is administered QW by SC injection.

As a dual GIP/GLP-1R agonist, tirzepatide could exceed the efficacy of selective GLP-1R analogs by recruiting metabolically active tissues not targeted by selective GLP-1R analogs (for example, adipose tissue as indicated by the observation of increased energy utilization) (Müller 2018) and has the potential to reach higher efficacy in target tissues, such as insulin-producing pancreatic beta-cells that express both GIPR and GLP-1R, before reaching its therapeutic limitation. Results from a Phase 2 study (GPGB) demonstrated that tirzepatide use in participants with T2DM was associated with a substantial, dose-dependent weight loss, greater than the weight change observed with dulaglutide, a specific GLP-1R agonist. General safety characteristics of all studied doses of tirzepatide were similar to that of the GLP-1R agonist class, consisting mainly of nausea, vomiting, and diarrhea. In general, these events were transient and mild or moderate in severity, with few severe episodes. These data suggest that tirzepatide has the potential to be a pharmacologic treatment for chronic weight management.

Although GI AEs were more common in the 15-mg arm of tirzepatide in the Phase 2 study (GPGB), this dose demonstrated the highest efficacy in terms of weight loss. An optimized dose escalation regimen proposed in the current Phase 3 Study (GPHM) to improve tolerability (and supported by a dose-escalation algorithm from study GPGF and PK/PD modelling) should enable a use of the 15-mg dose to maximize effects on body weight.

Study GPHM is designed to determine the impact of treatment with tirzepatide MTD (10 mg or 15 mg QW) compared with placebo on body weight management after an intensive lifestyle modification program in study participants without T2DM who have obesity or are overweight.

Study GPHM consists of a lead-in period of 12 weeks during which participants will undertake an intensive lifestyle modification program (Heymsfield et al. 2003). Traditionally, guidelines have restricted pharmacotherapy use to those who do not respond to diet and exercise but newer guidelines are recommending the addition of pharmacotherapy in those who lose weight with diet and exercise but may not be able to maintain the weight loss or may require additional weight loss. The goal of the lead-in period, therefore, is to identify participants who initially respond to lifestyle-based therapy so that the benefit of tirzepatide can be evaluated in this population. Only those participants who achieve  $\geq 5.0\%$  weight loss during the intensive lifestyle lead-in period will be randomized.

A low-calorie diet (LCD) was chosen for the lead-in period because it is a discrete, structured and intensive intervention that is recognized as the centerpiece of dietary therapy for overweight and obesity (NHLBI 2000). In those who can adhere to it, an LCD may achieve greater weight loss in the short-term than the moderate 500 kcal/day deficit diet being applied in combination with tirzepatide throughout the obesity Phase 3 program. Moreover, an LCD was chosen over the option of a very low-calorie diet (VLCD) because VLCDs are only used in limited circumstances by specialized practitioners experienced in their use and with special monitoring and supplementation (NHLBI 2000). Because VLCDs are not recommended as routine therapy for overweight or obesity, using a VLCD would have affected the generalizability of the results.

Clinical trials have also shown that LCDs are as effective as VLCDs at 1 year in achieving weight loss (Wadden et al. 1994).

After randomization, participants in both the placebo and MTD tirzepatide arms will continue to receive lifestyle modification counselling consistent with current guidelines for weight management (Jensen et al. 2014; NHLBI 2013). Specifically, participants will consult with a dietician, or equivalent qualified delegate, throughout the post-randomization treatment period to achieve an approximately 500 kcal/day energy deficit through a combination of caloric restriction and increased physical activity (see Section 5.3).

The planned duration of treatment for the primary endpoint at 72 weeks allows for a 52-week treatment period at the dose achieved following dose escalation to either 10 mg or 15 mg. This duration is considered appropriate to assess the full effects and balance of risk and benefit for tirzepatide MTD compared with placebo on body weight and is consistent with regulatory guidelines (FDA 2007; EMA 2016). A placebo comparator was selected for this trial in accordance with regulatory guidance (FDA 2007; EMA 2016).

The effects of drug cessation will be assessed in the 4-week safety follow-up/observational period. To minimize the potential confounding effect of changes to concomitant medications, participants will be permitted to use concomitant medications that do not interfere with the assessment of efficacy and safety characteristics of the study treatments.

### **4.3. Justification for Dose**

Tirzepatide MTD (10 mg or 15 mg QW) will be evaluated in this study. These doses and associated escalation schemes were selected based on assessment of safety, efficacy (weight loss), and GI tolerability data in Phase 1 and 2 studies in patients with T2DM, followed by exposure-response modeling of the data that predicted weight loss in patients with overweight or obesity.

In a 26-week, Phase 2 study (GPGB) of participants with T2DM, tirzepatide reduced body weight by 4.8 kg, 8.7 kg, and 11.3 kg at dose levels of 5, 10, and 15 mg, respectively, whereas the weight loss observed in participants on dulaglutide, a selective GLP-1R agonist, used at the dose of 1.5 mg, was 2.7 kg (Frias et al. 2018).

Similar to the GLP-1R agonist class, most of the tirzepatide AEs were dose-dependent and GI-related, consisting mainly of nausea, vomiting, and diarrhea. In general, these events were mild or moderate in severity, with few severe episodes, and transient.

Tirzepatide doses of 10 mg and 15 mg were selected based principally on the following criteria:

- each dose provides robust weight loss relative to placebo
- the percent of patients achieving  $\geq 10\%$  weight loss is higher with 15 mg than 10 mg, and
- safety and tolerability were supported by Phase 2 results and/or PK/PD modeling.

Dosing algorithms starting at a low dose of 2.5 mg accompanied by dose escalation of 2.5-mg increments every 4 weeks should permit time for development of tolerance to GI events and are predicted to minimize GI tolerability concerns. The maximum proposed dose of 15 mg maintains an exposure multiple of 1.6 to 2.4 to the no-observed adverse effect level doses in 6-month monkey and rat toxicology studies.

#### **4.4. End of Study Definition**

Section 7.2 describes the criteria used to determine if a participant has completed the study.

The end of the study is defined as the date of the last visit of the last participant in the study or last scheduled procedure shown in the SoA for the last participant in the trial globally.

## 5. Study Population

Prospective approval of protocol deviations to recruitment and enrollment criteria, also known as protocol waivers or exemptions, *is not permitted*.

### 5.1. Inclusion Criteria

Participants are eligible to be included in the study only if all of the following criteria apply:

#### Type of Participant and Disease Characteristics

1. Have a BMI of:
  - $\geq 30$  kg/m<sup>2</sup> or
  - $\geq 27$  kg/m<sup>2</sup> and previously diagnosed with at least 1 of the following weight-related comorbidities
    - Hypertension: treated or with systolic blood pressure  $\geq 130$  mmHg or diastolic blood pressure  $\geq 80$  mmHg
    - Dyslipidemia: treated or with low-density lipoprotein (LDL)  $\geq 160$  mg/dL (4.1 mmol/L) or triglycerides  $\geq 150$  mg/dL (1.7 mmol/L), or high-density lipoprotein (HDL)  $< 40$  mg/dL (1.0 mmol/L) for men or HDL  $< 50$  mg/dL (1.3 mmol/L) for women
    - Obstructive sleep apnea
    - Cardiovascular disease (for example, ischemic cardiovascular disease, New York Heart Association [NYHA] Functional Classification Class I-III heart failure)
2. Have a history of at least 1 self-reported unsuccessful dietary effort to lose body weight
3. In the investigator's opinion, are well-motivated, capable, and willing to:
  - learn how to self-inject study drug, as required for this protocol (visually impaired persons who are not able to perform the injections must have the assistance of a sighted individual trained to inject the study drug; persons with physical limitations who are not able to perform the injections must have the assistance of an individual trained to inject the study drug)
  - inject study drug (or receive an injection from a trained individual if visually impaired or with physical limitations)
  - follow study procedures for the duration of the study, including, but not limited to following lifestyle advice (for example, dietary restrictions, exercise plan), maintaining a study diary, and completing required questionnaires

#### Participant Characteristics

4. Are at least 18 years of age and age of majority per local laws and regulations
  - a. Male participants:

- Male participants with partners of childbearing potential should be willing to use reliable contraceptive methods throughout the study and for 5 half-lives of study drug plus 90 days, corresponding to 4 months after the last injection.
- b. Female participants:
  - Female participants not of childbearing potential may participate and include those who are:
    - infertile due to surgical sterilization (hysterectomy, bilateral oophorectomy, or tubal ligation) or congenital anomaly (such as Mullerian agenesis) or
    - Post-menopausal – defined as either:
      - A woman at least 40 years of age with an intact uterus, not on hormone therapy, who has cessation of menses for at least 1 year without an alternative medical cause, AND a follicle-stimulating hormone (FSH)  $\geq 40$  mIU/mL; women in this category must test negative in pregnancy test prior to study entry
      - or**
      - A woman 55 or older not on hormone therapy, who has had at least 12 months of spontaneous amenorrhea
      - or**
      - A woman at least 55 years of age with a diagnosis of menopause prior to starting hormone replacement therapy
  - Female participants of child-bearing potential (not surgically sterilized and between menarche and 1-year postmenopausal) must:
    - test negative for pregnancy at Visit 1 based on a serum pregnancy test
    - if sexually active, agree to use 2 forms of effective contraception, where at least 1 form is highly effective for the duration of the trial plus 30 days, corresponding to 2 months after the last injection, and
    - not be breastfeeding

**Note:** Contraceptive use by men or women should be consistent with local regulations regarding the methods of contraception for those participating in clinical studies.

### Informed Consent

5. Capable of giving signed informed consent as described in Section 10.1 (Appendix 1), which includes compliance with the requirements and restrictions listed in the ICF and in this protocol.

## 5.2. Exclusion Criteria

Participants are excluded from study enrollment if they meet any of the following criteria at screening:

### Medical Conditions

#### *Diabetes-Related*

6. Have Type 1 diabetes mellitus (T1DM) or T2DM, history of ketoacidosis, or hyperosmolar state/coma
7. Have at least 1 laboratory value suggestive of diabetes mellitus during screening, including 1 or more of: HbA1c  $\geq 6.5\%$  ( $\geq 48$  mmol/mol), fasting glucose  $\geq 126$  mg/dL ( $\geq 7.0$  mmol/L), or random glucose  $\geq 200$  mg/dL ( $\geq 11.1$  mmol/L)

#### *Obesity-Related*

8. Have a self-reported change in body weight  $>5$  kg within 3 months prior to screening
9. Have a prior or planned surgical treatment for obesity (excluding liposuction or abdominoplasty, if performed  $>1$  year prior to screening)
10. Have or plan to have endoscopic and/or device-based therapy for obesity or have had device removal within the last 6 months prior to screening
  - mucosal ablation
  - gastric artery embolization
  - intragastric balloon
  - duodenal-jejunal endoluminal liner

#### *Other Medical*

11. Have renal impairment measured as estimated glomerular filtration rate (eGFR)  $<30$  mL/min/1.73 m<sup>2</sup>, calculated by Chronic Kidney Disease-Epidemiology (CKD-EPI) as determined by central laboratory during screening
12. Have a known clinically significant gastric emptying abnormality (for example, severe gastroparesis or gastric outlet obstruction) or chronically take drugs that directly affect GI motility
13. Have a history of chronic or acute pancreatitis
14. Have thyroid-stimulating hormone (TSH) outside of the range of 0.4-6.0 mIU/L at the screening visit

*Note:* Participants receiving treatment for hypothyroidism may be included, provided their thyroid hormone replacement dose has been stable for at least 3 months and their TSH at screening falls within the range indicated above.



**Note:** Participants with a history of subclinical hypothyroidism but a TSH at screening within the range indicated above, may be included if in the investigator's opinion, the patient is unlikely to require initiation of thyroid hormone replacement during the course of the study.

15. Have obesity induced by other endocrinologic disorders (for example, Cushing syndrome) or diagnosed monogenetic or syndromic forms of obesity (for example, Melanocortin 4 Receptor deficiency or Prader Willi Syndrome)
16. Have a history of significant active or unstable Major Depressive Disorder (MDD) or other severe psychiatric disorder (for example, schizophrenia, bipolar disorder, or other serious mood or anxiety disorder) within the last 2 years

**Note:** Participants with MDD or generalized anxiety disorder whose disease state is considered stable for the past 2 years and expected to remain stable throughout the course of the study, in the opinion of the investigator, may be considered for inclusion if they are not on excluded medications

17. Have a lifetime history of suicide attempt
18. Have a PHQ-9 score of 15 or more at Visit 1
19. On the C-SSRS at any time from Visit 1 to Visit 2:
  - a "yes" answer to Question 4 (Active Suicidal Ideation with Some Intent to Act, Without Specific Plan) on the "Suicidal Ideation" portion of the C-SSRS
  - or**
  - a "yes" answer to Question 5 (Active Suicidal Ideation with Specific Plan and Intent) on the "Suicidal Ideation" portion of the C-SSRS
  - or**
  - a "yes" answer to any of the suicide-related behaviors (actual attempt, interrupted attempt, aborted attempt, preparatory act or behavior) on the "Suicidal Behavior" portion of the C-SSRS
  - and**
  - the ideation or behavior occurred within the past month
20. Have uncontrolled hypertension (systolic blood pressure above or equal to 160 mmHg and/or diastolic blood pressure above or equal to 100 mmHg)
21. Have any of the following cardiovascular conditions within 3 months prior to Visit 2:
  - acute myocardial infarction
  - cerebrovascular accident (stroke)
  - unstable angina, or
  - hospitalization due to congestive heart failure (CHF)
22. Have NYHA Functional Classification Class IV CHF

23. Have acute or chronic hepatitis, signs and symptoms of any other liver disease other than nonalcoholic fatty liver disease (NAFLD), or any of the following, as determined by the central laboratory during screening:

- alanine aminotransferase (ALT) level  $>3.0X$  upper limit of normal (ULN) for the reference range
- alkaline phosphatase (ALP) level  $>1.5X$  ULN for the reference range, or
- total bilirubin (TBL) level  $>1.2X$  ULN for the reference range (except for cases of known Gilbert's Syndrome)

**Note:** Participants with NAFLD are eligible to participate in this trial if their ALT level is  $\leq 3.0X$  ULN for the reference range.

24. Have a serum calcitonin level (at Visit 1) of

- $\geq 20$  ng/L, if eGFR  $\geq 60$  mL/min/1.73 m<sup>2</sup>
- $\geq 35$  ng/L, if eGFR  $< 60$  mL/min/1.73 m<sup>2</sup>

25. Have a family or personal history of medullary thyroid carcinoma (MTC) or multiple endocrine neoplasia (MEN) syndrome type 2

26. Have a history of an active or untreated malignancy or are in remission from a clinically significant malignancy (other than basal or squamous cell skin cancer, in situ carcinomas of the cervix, or in situ prostate cancer) for less than 5 years

27. Have any other condition not listed in this section (for example, hypersensitivity or intolerance) that is a contraindication to GLP-1R agonists

28. Have a history of any other condition (such as known drug or alcohol abuse, diagnosed eating disorder, or other psychiatric disorder) that, in the opinion of the investigator, may preclude the participant from following and completing the protocol

29. Have history of use of marijuana or tetrahydrocannabinol (THC)-containing products within 3 months of enrollment or unwillingness to abstain from marijuana or THC-containing products use during the trial

**Note:** If a participant has used cannabidiol oil during the past 3 months but agrees to refrain from use for the duration of the study, the participant can be enrolled.

30. Have had a transplanted organ (corneal transplants [keratoplasty] are allowed) or are awaiting an organ transplant

31. Have any hematological condition that may interfere with HbA1c measurement (for example, hemolytic anemias, sickle cell disease)

### ***Prior/Concomitant Therapy***

32. Are receiving or have received within 3 months prior to screening chronic ( $>2$  weeks or 14 days) systemic glucocorticoid therapy (excluding topical, intra-ocular, intranasal, intra-articular, or inhaled preparations) or have evidence of a significant, active autoimmune abnormality (for example, lupus or rheumatoid arthritis) that has required

(within the last 3 months) or is likely to require, in the opinion of the investigator, concurrent treatment with systemic glucocorticoids (excluding topical, intra-ocular, intranasal, intra-articular, or inhaled preparations) during the course of the study

33. Have current treatment with or history of (within 3 months prior to Visit 2 ) treatment with medications that may cause significant weight gain, including but not limited to: tricyclic antidepressants, atypical antipsychotics, and mood stabilizers

**Examples:**

- imipramine
- amitriptyline
- mirtazapine
- paroxetine
- phenelzine
- chlorpromazine
- thioridazine
- clozapine
- olanzapine
- valproic acid (and its derivatives), or
- lithium

*Note:* Selective serotonin reuptake inhibitors (SSRIs) other than paroxetine are permitted.

34. Have taken, within 3 months prior to Visit 2, medications (prescribed or over-the-counter) or alternative remedies that promote weight loss

**Examples include, but are not limited to:**

- Saxenda (liraglutide 3.0 mg)
- Xenical®/Alli® (orlistat)
- Meridia® (sibutramine)
- Acutrim® (phenylpropanolamine)
- Sanorex® (mazindol)
- Apidex® (phentermine)
- BELVIQ® (lorcaserin)
- Bontril® (phendimetrazine)
- Qsymia™ (phentermine/topiramate combination)
- Contrave® (naltrexone/bupropion)

*Note:* Use of metformin, or any other glucose-lowering medication, whether prescribed for polycystic ovarian syndrome (PCOS) or diabetes prevention is not permitted.

35. Have started implantable or injectable contraceptives (such as Depo Provera®) within 18 months prior to screening

***Prior/Concurrent Clinical Study Experience***

36. Are currently enrolled in any other clinical study involving an investigational product (IP) or any other type of medical research judged not to be scientifically or medically compatible with this study
37. Within the last 30 days, have participated in a clinical study and received treatment, whether active or placebo. If the study involved an IP, 5 half-lives or 30 days, whichever is longer, should have passed
38. Have previously completed or withdrawn from this study or any other study investigating tirzepatide after receiving at least 1 dose of IP

***Other Exclusions***

39. Are investigator site personnel directly affiliated with this study and/or their immediate families. Immediate family is defined as a spouse, parent, child, or sibling, whether biological or legally adopted
40. Are Lilly employees

**5.3. Lifestyle Considerations**

Per the SoA (Section 1.3), participants will consult with a dietician, or equivalent qualified delegate, according to local standards, to receive lifestyle management counseling at Weeks -12, -11, -10, -9, -8, -6, -4 and -2 prior to randomization and then at Weeks 0, 12, 24, 36, 48, 60 and 72 post-randomization.

Diet and exercise goals established during the lifestyle consultation and the importance of adherence to the lifestyle component of the trial will be reinforced at each trial contact by study staff.

**5.3.1. Meals and Dietary Restrictions**

During the intensive lifestyle modification lead-in period, participants will receive instruction from a dietician, or equivalent qualified delegate, to reduce their daily caloric energy intake to approximately 1200 kcal/day for women or 1500 kcal/day for men for 12 weeks. During this lead-in period, up to 2 liquid meal replacements per day are permitted, but not required, to achieve the targeted energy deficit. In addition to the diet modification, participants will be encouraged to exercise on a regular basis, with a recommendation of at least 150 minutes per week of moderate intensity activity (for example, brisk walking). Participants will be counseled on behavior modification strategies to help implement and adhere to the diet and exercise recommendations. Participants who achieve a  $\geq 5.0\%$  body weight loss at the end of the 12-week lead-in period (Week 0) will proceed to randomization to either tirzepatide or placebo.

After randomization, participants will be advised to maintain their daily energy intake at 500 kcal below their individualized energy requirements (Garvey et al. 2016), as calculated by the Food and Agriculture Organization of the United Nations/World Health Organization [WHO]/United Nations University (FAO/WHO/UNU) estimates of human energy requirements, using a “sedentary” physical activity level (PAL) of 1.3 (FAO/WHO/UNU 2004).

Participants will be encouraged to maintain moderate intensity physical activity of at least 150 minutes per week. Liquid meal replacement is permitted but will not be provided during the post-randomization treatment period. The recommended macronutrient distribution will be

- maximum 30% of energy from fat
- approximately 20% of energy from protein
- approximately 50% of energy from carbohydrates, and
- an energy deficit of approximately 500 kcal/day compared to the participant's estimated total energy expenditure (TEE).

To encourage adherence, it is recommended that behavior modification tools be used, such as completion of a 3-day diet and exercise log prior to each counseling visit. During each visit, the participant's diet will be reviewed and behavior modification strategies to maximize adherence will be provided as needed.

The hypocaloric diet will be continued throughout the treatment period. If a BMI  $\leq 22$  kg/m<sup>2</sup> is reached, the recommended energy intake should be recalculated with no kcal deficit for the remainder of the trial.

Total energy expenditure is calculated by multiplying the estimated Basal Metabolic Rate (BMR) (see table below) with a PAL value of 1.3 (FAO/WHO/ UNU 2004), which reflects an inactive lifestyle. This calculation provides a conservative estimate of caloric requirements:

$$\text{TEE (kcal/day)} = \text{BMR} \times 1.3$$

#### Equations for Estimating BMR in kcal/Day\*

| Sex   | Age         | BMR (kcal/day)                       |
|-------|-------------|--------------------------------------|
| Men   | 18-30 years | 15.057 X actual weight in kg + 692.2 |
|       | 31-60 years | 11.472 X actual weight in kg + 873.1 |
|       | >60 years   | 11.711 X actual weight in kg + 587.7 |
| Women | 18-30 years | 14.818 X actual weight in kg + 486.6 |
|       | 31-60 years | 8.126 X actual weight in kg + 845.6  |
|       | >60 years   | 9.082 X actual weight in kg + 658.5  |

Abbreviation: BMR = basal metabolic rate; WHO = World Health Organization.

\*Revised WHO equations (adapted from: FAO/WHO/UNU 2004).

#### 5.3.2. Physical Activity

At Visit 2 and all subsequent visits, participants will be advised to increase their physical activity to moderate intensity (for example, brisk walking) for at least 150 minutes per week.

#### **5.4. Screen Failures**

Screen failures are defined as participants who consent to participate in the clinical study but are not subsequently enrolled in the study. A minimal set of screen failure information is required to ensure transparent reporting of screen failure participants to meet the Consolidated Standards of Reporting Trials (CONSORT) publishing requirements and to respond to queries from regulatory authorities. Minimal information includes demography, screen failure details, eligibility criteria, and any serious adverse event (SAE).

Individuals who do not meet the criteria for participation in this study (screen failure) may not be rescreened.

## 6. Study Intervention

Study intervention is defined as any study drug intervention, investigational intervention(s), marketed product(s), placebo, or medical device(s) intended to be administered to/used by a study participant according to the study protocol.

### 6.1. Study Intervention(s) Administered

|                                |                                                                                                                                                                                                          |         |
|--------------------------------|----------------------------------------------------------------------------------------------------------------------------------------------------------------------------------------------------------|---------|
| <b>Arm Name</b>                | Tirzepatide MTD                                                                                                                                                                                          | Placebo |
| <b>Dose</b>                    | 10 mg or 15 mg QW                                                                                                                                                                                        | N/A     |
| <b>Route of Administration</b> | SC                                                                                                                                                                                                       |         |
| <b>Sourcing</b>                | Provided centrally by the sponsor and dispensed via IWRS                                                                                                                                                 |         |
| <b>Packaging and Labeling</b>  | Study drug intervention will be provided in autoinjectors (single-dose pens) packaged in cartons to be dispensed. Clinical study materials will be labeled according to country regulatory requirements. |         |

Abbreviations: IWRS = interactive web-response system; MTD = maximum tolerated dose; N/A = not applicable; QW = once-weekly; SC = subcutaneous.

There are no restrictions on the time of day each weekly dose of study drug is given, but it is advisable to administer the SC injections on the same day and same time each week. The actual date, time, and injection site location of all dose administrations will be recorded in the diary by the participant. If a dose of study drug is missed, the participant should take it as soon as possible unless it is within 72 hours of the next dose, in which case, that dose should be skipped and the next dose should be taken at the appropriate time. The day of weekly administration can be changed if necessary, as long as the last dose was administered 72 or more hours before.

All participants will inject study drug SC in the abdomen or thigh using the injection supplies provided; a caregiver may administer the injection in the participant's upper arm. The injection-site location of all dose administrations will be recorded in the diary by the participant. A new autoinjector will be used for each injection. If study drug is to always be injected in the same body region, participants should be advised to rotate injection sites each week.

#### 6.1.1. Medical Devices

The combination products provided for use in the study are tirzepatide investigational autoinjector (or matching placebo). Any AE resulting from device deficiencies, misuse, or malfunctions must be detected, documented, and reported by the investigator throughout the study (see Section 10.4.3).

## 6.2. Preparation/Handling/Storage/Accountability

- The investigator or designee must confirm appropriate storage conditions have been maintained during transit for all study drug intervention received and any discrepancies are reported and resolved before use of the study drug intervention.
- Only participants randomized in the study may receive study drug intervention. Only study personnel may supply, prepare, or administer study drug intervention. All study drug intervention must be stored in a secure, environmentally controlled, and monitored (manual or automated) area in accordance with the labeled storage conditions with access limited to the investigator and authorized study personnel.
- The investigator or authorized study personnel are responsible for study drug intervention accountability, reconciliation, and record maintenance (for example, receipt, reconciliation, and final disposition records).
- Further guidance and information for the final disposition of unused study drug interventions are provided in the study training materials.

## 6.3. Measures to Minimize Bias: Randomization and Blinding

This is a double-blind, randomized study.

Participants who meet all criteria for enrollment will undergo a 12-week intensive lifestyle modification lead-in period. Those who achieve  $\geq 5.0\%$  weight loss at Visit 10 will be randomized to one of the study treatment groups (tirzepatide MTD or placebo) for the duration of the treatment period. Assignment to treatment groups will be determined by a computer-generated random sequence using an IWRS. Participants will be randomized in a 1:1 ratio to receive tirzepatide MTD or placebo.

The randomization will be stratified by country, sex (female, male), and percent weight loss at the end of lead-in ( $<10\%$  versus  $\geq 10\%$ ).

Investigators, site staff, clinical monitors and participants will remain blinded to the treatment assignments until the study is complete.

Emergency unblinding for AEs may be performed through the IWRS. This option may be used ONLY if the participant's well-being requires knowledge of the participant's treatment assignment. All emergency unblinding events are recorded and reported by the IWRS.

If an investigator, site personnel performing assessments, or participant is unblinded, the participant must be discontinued from the study. In cases where there are ethical reasons to have the participant remain in the study the investigator must obtain specific approval from a Lilly clinical research physician (CRP) for the participant to continue in the study.

In case of an emergency, the investigator has the sole responsibility for determining if unblinding of a participant's treatment assignment is warranted for medical management of the event. The participant's safety must always be the first consideration in making such a determination. If a participant's treatment assignment is unblinded, Lilly must be notified immediately. If the investigator decides that unblinding is warranted, it is the responsibility of the investigator to promptly document the decision and rationale and notify Lilly as soon as possible.



#### **6.4. Study Intervention Compliance**

Participant compliance with study drug intervention will be assessed at each visit (after randomization). Study drug compliance will be determined by the following:

- Study drug administration data will be recorded by the participant and reviewed by the investigator at each study visit.
- The participants will be instructed to return any unused study drug and/or empty cartons at the next office visit to the study site for the purpose of performing drug accountability.

Treatment compliance for each visit interval is defined as taking at least 75% of the required doses of study drug. Similarly, a participant will be considered significantly noncompliant if he or she is judged by the investigator to have intentionally or repeatedly taken more than the prescribed amount of medication (more than 125%).

In addition to the assessment of a participant's compliance with the study drug administration, other aspects of compliance with the study treatments will be assessed at each visit based on the participant's adherence to the visit schedule, completion of study diaries, and any other parameters the investigator considers necessary.

Participants considered to be poorly compliant with their study drug and/or the study procedures will receive additional training and instruction, as required, and will be reminded of the importance of complying with the protocol.

#### **6.5. Concomitant Therapy**

Participants will be permitted to use concomitant medications that they require during the study, except certain medications (for example, other medications for weight management, see Section 5.2) that may interfere with the assessment of efficacy and safety characteristics of the study treatments.

Participants who develop diabetes during the study may initiate medication for glucose control, with the exception of dipeptidyl peptidase 4 (DPP-4) inhibitors or GLP-1R agonists. Initiation of metformin for the treatment of diabetes is permitted, but metformin should not be initiated during the study for the treatment of other metabolic conditions (for example, PCOS, diabetes prevention). Management of incident diabetes should be performed by participants' usual care providers.

Investigative site staff will inform participants that they must consult with the investigator or a designated site staff member upon being prescribed any new medications during the study. This may not be possible when initiated for treatment of medical emergencies, in which case, the participant will inform the investigator or a designated site staff member as soon as possible.

Non-study medications taken by participants who are screened but not enrolled will not be reported to Lilly unless an SAE or AE occurs that the investigator believes may have been caused by a study procedure.

## **6.6. Dose Modification**

### **6.6.1. Tirzepatide**

Tirzepatide is given QW by SC injection. There are no restrictions on the time of day each weekly dose of tirzepatide is given, but it is advisable to administer the SC injections on the same day of the week and similar time each week. If a dose of tirzepatide is missed, the participant should take it as soon as possible unless it is within 72 hours of the next dose, in which case, that dose should be skipped and the next dose should be taken at the appropriate time (see Section 6.1).

Study drug dose modification is not permitted, except for management of intolerable GI symptoms from Week 0 to Week 24 (see Section 6.6.2).

### **6.6.2. Management of Participants with Gastrointestinal Symptoms**

Participants who experience intolerable GI symptoms (for example, nausea, vomiting, or diarrhea) at any time during the study, should first be counseled on dietary behaviors that may help mitigate nausea and vomiting (for example, eating smaller meals, splitting 3 daily meals into 4 or more smaller ones, and stopping eating when they feel full) (see Section 10.9). If symptoms persist, the participant should be prescribed, at the investigator's discretion, symptomatic medication (for example, antiemetic or antidiarrheal medication). A temporary interruption of study drug for 1 dose is permitted, provided the participant has taken the last 3 weekly doses. Study treatment should be resumed immediately, either alone or in combination with symptomatic medication, which can also be utilized to manage symptoms. Management of study drug after interruptions >1 dose is discussed in Section 7.1.1.

During the first 24 weeks of the treatment period (20-week dose-escalation plus 4 weeks), if intolerable GI symptoms (for example, nausea, vomiting, or diarrhea) persist despite the above measures, the investigator should contact Lilly to consider a dose de-escalation step with subsequent re-escalation (Section 4.1.1.2.3). During the remaining treatment period (Week 24 to Week 72), dose de-escalation with subsequent re-escalation, or dose de-escalation to a lower maintenance dose, is not permitted. Those with intolerable GI symptoms that develop after 24 weeks and persist despite the above measures (for example, dietary counseling, symptomatic medication, and interruption of study drug for one dose) should discontinue study drug but remain in the study for continued follow-up.

## **6.7. Intervention after the End of the Study**

Tirzepatide will not be made available to participants after conclusion of the study.

## 7. Discontinuation of Study Intervention and Participant Discontinuation/Withdrawal

### 7.1. Discontinuation of Study Intervention

In rare instances, it may be necessary for a participant to permanently discontinue (definitive discontinuation) study drug intervention. If intervention is definitively discontinued, the participant will remain in the study to be evaluated for any trial endpoint at the end of the study. See the SoA for data to be collected at the time of discontinuation of study drug intervention and follow-up and for any further evaluations that need to be completed.

In some instances, it may be necessary for a participant to permanently discontinue the intensive lifestyle intervention during the 12-week lead-in phase. If the intensive lifestyle intervention is discontinued during the lead-in period, the participant will be permanently discontinued from the study.

#### **Possible reasons leading to permanent discontinuation of intensive lifestyle intervention during lead-in period or study drug intervention during treatment period:**

- **Participant Decision**
  - The participant requests to discontinue intensive lifestyle intervention during the lead-in period or study drug intervention during treatment period.
  
- **Clinical Considerations**
  - Initiation of open-label GLP-1R agonist or DPP-4 inhibitor, if participants will not or cannot discontinue them
  - BMI  $\leq 18.5$  kg/m<sup>2</sup> is reached at any time
    - Note:* The investigator should contact the sponsor CRP to discuss whether it is medically appropriate for the participant to continue study treatment
  - Diagnosis of T1DM
  - Diagnosis of MTC or MEN syndrome type 2
  - Significant elevation of serum calcitonin (Section 8.3.2.4)
  - Diagnosis of acute or chronic pancreatitis
  - Diagnosis of an active or untreated malignancy (other than basal or squamous cell skin cancer, in situ carcinomas of the cervix, or in situ prostate cancer)
  - Onset of pregnancy in a female participant
  - Occurrence of any other treatment-emergent AE (TEAE), SAE, or clinically significant finding for which the investigator believes that permanent discontinuation is the appropriate measure to be taken
  - Inadvertent enrollment if continued intensive lifestyle intervention or treatment with study drug would not be medically appropriate or not allowed per local regulations
  - PHQ-9 score  $\geq 15$ .

- Participants should be referred to a Mental Health Professional (MHP) to assist in deciding whether the participant should be discontinued. If a participant's psychiatric disorder can be adequately treated with psycho- and/or pharmacotherapy, then the participant, at the discretion of the investigator (in agreement with the MHP), may be continued in the trial.
  - Participants with C-SSRS responses **at any visit** indicative of suicidal ideation or behavior should have intensive lifestyle or study drug interventions discontinued and be referred to an MHP. Both interventions may be restarted, if the MHP and the investigator agree it is appropriate for the participant. Responses that should prompt mental health referral and cessation of intensive lifestyle intervention or study drug intervention are
    - a “yes” answer to Question 4 (Active Suicidal Ideation with Some Intent to Act, Without Specific Plan) on the "Suicidal Ideation" portion of the C-SSRS
    - or**
    - a “yes” answer to Question 5 (Active Suicidal Ideation with Specific Plan and Intent) on the "Suicidal Ideation" portion of the C-SSRS
    - or**
    - a “yes” answer to any of the suicide-related behaviors (actual attempt, interrupted attempt, aborted attempt, preparatory act or behavior) on the “Suicidal Behavior” portion of the C-SSRS

*Note:* A psychiatrist or appropriately trained professional may assist in the decision to discontinue the participant.

- **Discontinuation due to a hepatic event or liver test abnormality.**
  - Participants who are discontinued from intensive lifestyle intervention or study drug intervention due to a hepatic event or liver test abnormality should have additional hepatic safety data collected via eCRF.
  - Discontinuation of intensive lifestyle intervention or study drug intervention for abnormal liver tests **should be** considered by the investigator when a participant meets one of the following conditions after consultation with the Lilly designated medical monitor:
    - ALT or aspartate aminotransferase (AST) >8X ULN
    - ALT >2X baseline value or  $\geq 300$  U/L, whichever occurs first, if baseline ALT  $\geq 2X$  ULN
    - ALT or AST >5X ULN for more than 2 weeks
    - ALT or AST >3X ULN and TBL >2X ULN or international normalized ratio (INR) >1.5
    - ALT or AST >3X ULN with the appearance of fatigue, nausea, vomiting, right upper-quadrant pain or tenderness, fever, rash, and/or eosinophilia (>5%)

- ALP >3X ULN
- ALP >2.5X ULN and TBL >2X ULN
- ALP >2.5X ULN with the appearance of fatigue, nausea, vomiting, right upper-quadrant pain or tenderness, fever, rash, and/or eosinophilia (>5%)

*Note:* In this study baseline may refer to lead-in enrollment visits or randomization visit, whichever is the most recent point of reference.

**The following are also applicable if developing/occurring during intensive lifestyle lead-in period:**

- Ketoacidosis or hyperosmolar state/coma
- Uncontrolled hypertension (systolic blood pressure above or equal to 160 mmHg and/or diastolic blood pressure above or equal to 100 mmHg)
- Diagnosis of any of the following cardiovascular conditions:
  - Acute myocardial infarction
  - Cerebrovascular accident (stroke)
  - Unstable angina
  - Hospitalization due to CHF, or
  - NYHA Functional Classification Class IV CHF
- Chronic (>2 weeks or >14 days) systemic glucocorticoid therapy (excluding topical, intra-ocular, intranasal, intra-articular, or inhaled preparations) or evidence of a significant, active autoimmune abnormality (for example, lupus or rheumatoid arthritis) that has required or is likely to require, in the opinion of the investigator, concurrent treatment with systemic glucocorticoids (excluding the ones mentioned above)
- Surgical treatment or endoscopic and/or device-based therapy for obesity
- Initiation of treatment with medications that may significantly impact body weight (please refer to Section 5.2. for details)
- Initiation of implantable or injectable contraceptives (such as Depo Provera®)

**The following are also applicable during study drug intervention period (after randomization):**

- Intolerable GI symptoms despite management as described in Section 6.6.2
- If the investigator, after consultation with the sponsor-designated medical monitor, determines that a systemic hypersensitivity reaction has occurred related to study drug administration, the participant should be permanently discontinued from the investigational drug.

Participants who stop intensive lifestyle intervention permanently should perform an early discontinuation (ED) visit and discontinue from the study. Participants who stop the study drug permanently should perform an ED visit and continue to attend all scheduled study visits to collect all planned efficacy and safety measurements. Randomized participants who are unwilling to attend all scheduled visits and stop the study treatment prior to 72 weeks, should

return for a final weight measurement (Visit 99). If participants are unwilling to attend Visit 99, their refusal to attend should be documented in the patient medical record.

See the SoA for data to be collected at the time of intervention discontinuation and follow-up and for any further evaluations that need to be completed.

### 7.1.1. Temporary Discontinuation

In certain situations, after randomization, the investigator may need to temporarily interrupt study drug. Every effort should be made by the investigator to maintain participants on study drug and to restart study drug after any temporary interruption, as soon as it is safe to do so. Distribution of study drug at the correct dose will be per IWRS instructions.

| If study drug interruption is...    | then...                                                                                                 |
|-------------------------------------|---------------------------------------------------------------------------------------------------------|
| 2 consecutive doses or less         | participant restarts study drug at last administered dose, as per escalation schedule.                  |
| 3 consecutive doses or more         | participant restarts study drug at 5 mg (managed by IWRS) and repeats dose escalation scheme.           |
| due to an AE                        | the event is to be documented and followed according to the procedures in Section 8.3 of this protocol. |
| due to intolerable persistent GI AE | participants should be treated as suggested in Section 6.6.2.                                           |

Investigators should inform the sponsor that study drug has been temporarily interrupted. The data related to temporary interruption of study treatment will be documented in source documents and entered on the eCRF.

### 7.2. Participant Discontinuation/Withdrawal from the Study

To minimize the amount of missing data and to enable assessment of study objectives as planned in the study protocol, every attempt will be made to keep participants in the study irrespective of the following:

- adherence to or discontinuation from study drug
- adherence to visit schedule
- missing assessments
- study drug discontinuation due to AE
- development of comorbidities
- development of clinical outcomes

The circumstances listed above are *not* valid reasons for discontinuation from the study.

A participant may withdraw from the study:

- at any time at his/her own request
- at the request of his/her designee (for example, parents or legal guardian)
- at the discretion of the investigator for safety, behavioral, compliance, or administrative reasons
- if enrolled in any other clinical study involving an IP or enrolled in any other type of medical research judged not to be scientifically or medically compatible with this study
- if the participant, for any reason, requires treatment (for example, pharmacological, device-based or surgical) that has been demonstrated to be effective for treatment of the study indication, discontinuation from the study occurs prior to introduction of the new treatment

Female participants will be withdrawn from the study if the participant becomes pregnant.

Participation in the study can be stopped for medical, safety, regulatory, or other reasons consistent with applicable laws, regulations, and Good Clinical Practice (GCP). Participants who agree to provide information relevant to any trial endpoint at the end of the study are not considered to have discontinued from the study.

At the time of discontinuing from the study, if possible, an ED visit should be conducted, as shown in the SoA. See the SoA for data to be collected at the time of study discontinuation and follow-up and for any further evaluations that need to be completed. The participant will be permanently discontinued from either the intensive lifestyle intervention or study drug intervention, and from the study at that time.

If the participant withdraws consent for disclosure of future information, the sponsor may retain and continue to use any data collected before such a withdrawal of consent. If a participant withdraws from the study, he/she may request destruction of any samples taken and not tested, and the investigator must document this in the site study records.

### 7.2.1. Participant Disposition and Timing of Safety Follow-Up

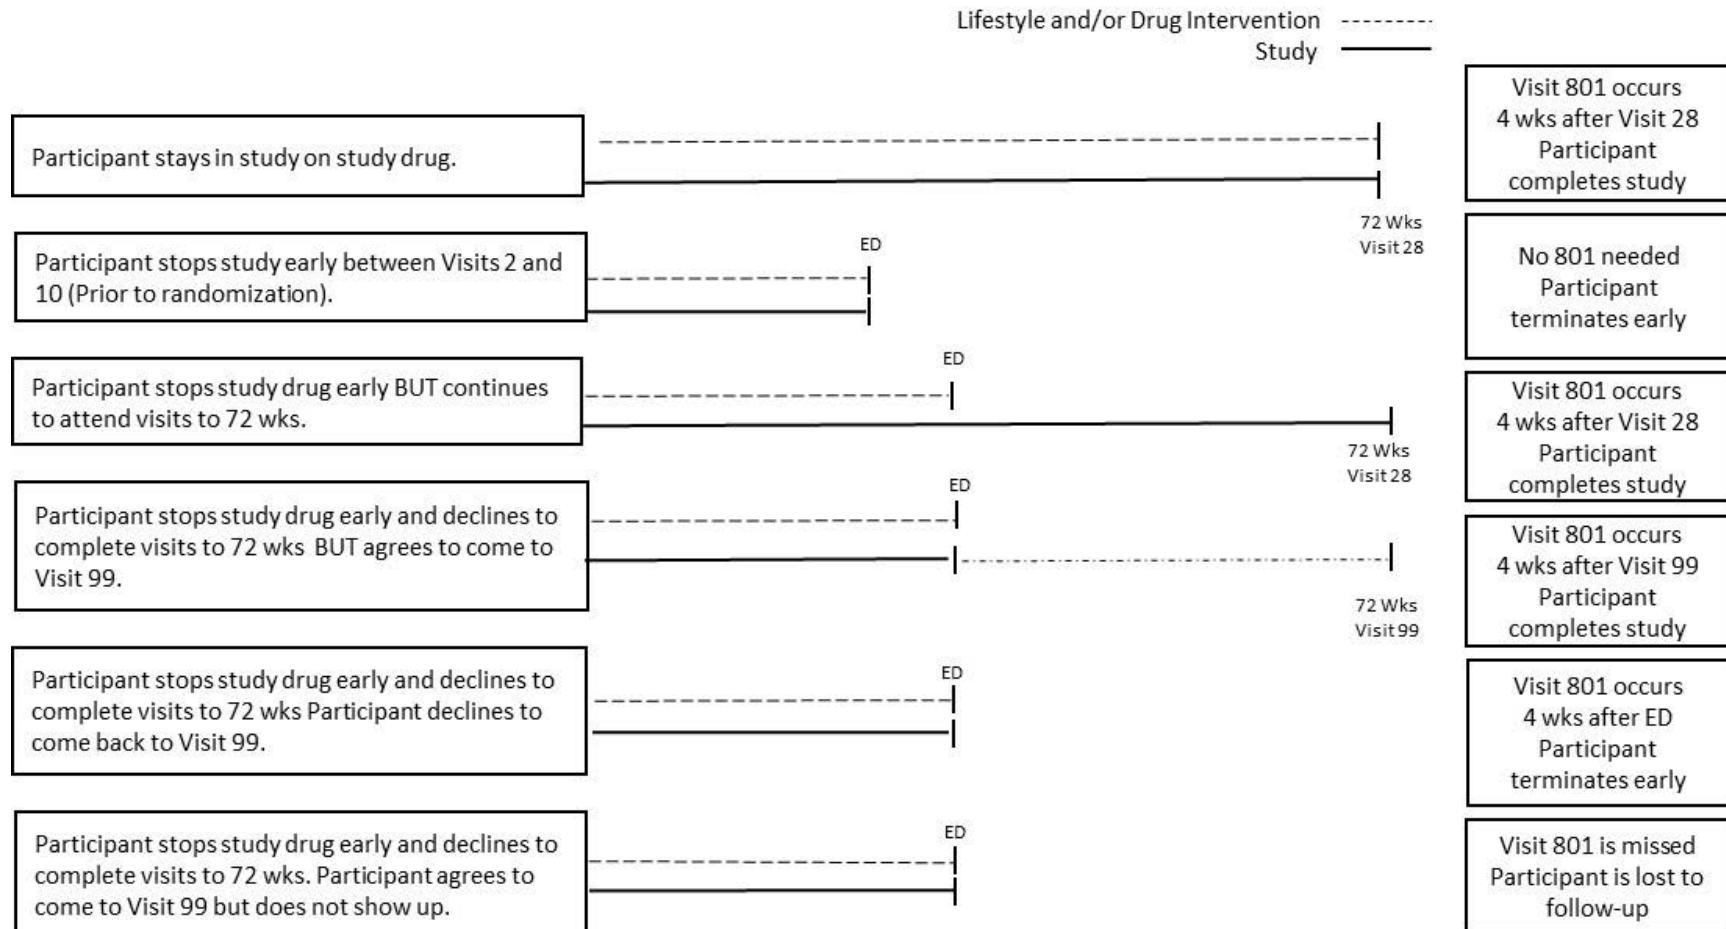

Abbreviations: ED = early discontinuation; wk(s) = week(s).



### **7.2.2. Discontinuation of Inadvertently Enrolled Participants**

If the sponsor or investigator identifies a participant who did not meet enrollment criteria and was inadvertently enrolled, the investigator and the sponsor CRP must agree whether continuing the study drug intervention is medically appropriate. Participants identified as being inadvertently enrolled during lead-in period should be discontinued. Continuation of inadvertently enrolled participants in the study, with or without study drug treatment, requires documented approval from the sponsor CRP. Safety follow up should be performed as outlined in Section 1.3 (SoA), Section 8.3 (Adverse Events, Serious Adverse Events, and Product Complaints), and Section 8.2 (Safety Assessments) of the protocol.

### **7.3. Lost to Follow up**

A participant will be considered lost to follow-up if he or she repeatedly fails to return for scheduled visits and is unable to be contacted by the study site. Site personnel or designee are expected to make diligent attempts to contact participants who fail to return for a scheduled visit or were otherwise unable to be followed-up by the site.

Site personnel, or an independent third party, will attempt to collect the vital status of the participant within legal and ethical boundaries for all participants enrolled, including those who did not get IP. Public sources may be searched for vital status information. If vital status is determined to be deceased, this will be documented, and the participant will not be considered lost to follow-up.

Lilly personnel will not be involved in any attempts to collect vital status information.

Discontinuation of specific sites or of the study as a whole are handled as part of Section 10.1 (Appendix 1).

## **8. Study Assessments and Procedures**

- Study procedures and their timing are summarized in the SoA.
- Immediate safety concerns should be discussed with the sponsor immediately upon occurrence or awareness to determine if the participant should continue or discontinue intensive lifestyle intervention or study drug intervention
- Adherence to the study design requirements, including those specified in the SoA, is essential and required for study conduct.
- All screening evaluations must be completed and reviewed to confirm that potential participants meet all eligibility criteria. The investigator will maintain a screening log to record details of all participants screened and to confirm eligibility or record reasons for screening failure, as applicable

### **8.1. Efficacy Assessments**

#### **8.1.1. Primary Efficacy Assessments**

The primary efficacy measurement in this study is body weight. Body weight measurements will be collected at specific clinic visits as summarized in the SoA. Methods for measuring body weight are described in Section 10.7.

#### **8.1.2. Secondary Efficacy Assessments**

The following secondary efficacy measures will be collected at the times shown in the SoA (Section 1.3)

- BMI (derived using body weight in kilograms divided by the square of height in meters)
- Waist circumference (measuring method is described in Section 10.7)
- Fasting insulin (measured through central lab)
- HbA1c (measured through central lab)
- Fasting glucose (measured through central lab)
- Blood pressure (measuring method is described in Section 10.7)
- Lipids (measured through central lab)

#### **8.1.3. Patient-Reported Outcomes Assessments**

The self-administered questionnaires will be translated into the native language of the region, linguistically validated and administered according to the SoA (Section 1.3). At these visits, the questionnaires should be completed before the participant has discussed their medical condition or progress in the study with the investigator and/or site staff, if the participant is not adversely affected by their fasting condition.

### **8.1.3.1. Short-Form 36 Version 2 Health Survey, Acute Form, 1-Week Recall Version**

The SF-36v2 acute form, 1-week recall version is a 36-item generic, participant-administered measure designed to assess the following 8 domains

- Physical functioning
- Role-physical
- Bodily pain
- General health
- Vitality
- Social functioning
- Role-emotional
- Mental health

The Physical Functioning domain assesses limitations due to health “now” while the remaining domains assess functioning “in the past week.” Each domain is scored individually and information from these 8 domains are further aggregated into 2 health-component summary scores: Physical Component Summary and Mental Component Summary. Items are answered on Likert scales of varying lengths (3-, 5- or 6- point scales). Scoring of each domain and both summary scores are norm-based and presented in the form of T-scores, with a mean of 50 and standard deviation (SD) of 10; higher scores indicate better levels of function and/or better health (Maruish 2011).

### **8.1.3.2. Impact of Weight on Quality of Life-Lite Clinical Trials Version**

The IWQOL-Lite-CT is a 20-item, obesity-specific PRO instrument developed for use in obesity clinical trials. It assesses 2 primary domains of obesity-related health-related quality of life (HRQoL): Physical (7 items), and Psychosocial (13 items). A 5-item subset of the Physical domain – the Physical Function composite is also supported. Items in the Physical Function composite describe physical impacts related to general and specific physical activities. All items are rated on either a 5-point frequency (“never” to “always”) scale or a 5-point truth (“not at all true” to “completely true”) scale (Kolotkin et al. 2017, 2019).

### **8.1.3.3. EQ-5D-5L**

Generic HRQoL will be assessed using the EQ-5D-5L (EuroQoL Research Foundation 2019). The EQ-5D-5L is a standardized 5-item instrument for use as a measure of health outcome. It provides a simple descriptive profile and a single index value for health status that can be used in the clinical and economic evaluation of health care as well as population health surveys. The EQ-5D-5L comprises 5 dimensions of health (mobility, self-care, usual activities, pain/discomfort, and anxiety/depression). The 5L version, introduced in 2005, scores each dimension at 5 levels (no problems, slight problems, moderate problems, severe problems, unable to perform/extreme problems), for a total of 3125 possible health states. In addition to the health profile, a single health state index value can be derived based on a formula that attaches weights to each of the levels in each dimension. This index value ranges between less than 0 (where 0 is a health state equivalent to death; negative values are valued as worse than dead) to 1 (perfect health) (Dolan 1997). In addition, the EQ Visual Analog Scale records the respondent’s self-rated health status

on a vertical graduated (0 to 100) visual analog scale. In conjunction with the health state data, it provides a composite picture of the respondent's health status.

The EQ-5D-5L is used worldwide and is available in more than 170 different languages. Details on the instrument, scoring, organizing, and presenting the data collected can be found in the EQ-5D-5L User Guide (EuroQoL Research Foundation 2019).

#### **8.1.3.4. Patient Global Impression of Status for Physical Activity**

Study participants will be asked to complete a PGIs item specifically developed for this study. This is a participant-rated assessment of current limitation on physical activity due to health and is rated on a 5-point scale ranging from "1- not at all limited" to "5- extremely limited".

## **8.2. Safety Assessments**

Planned time points for all safety assessments are provided in the SoA.

### **8.2.1. Physical Examinations**

- A complete physical examination will include, at a minimum, assessments of the cardiovascular, respiratory, GI and neurological systems, as well as thyroid exam. Height, weight, and waist circumference will also be measured and recorded, per Section 10.7.
- Investigators should pay special attention to clinical signs related to previous serious illnesses.

### **8.2.2. Vital Signs**

- For each participant, vital signs measurements should be conducted according to the SoA (Section 1.3) and following the study-specific recommendations included in Section 10.7 (Appendix 7).
- Any clinically significant findings from vital signs measurement that result in a diagnosis should be reported to Lilly or its designee as an AE via the eCRF.

### **8.2.3. Electrocardiograms**

For each participant, single-tracing 12-lead electrocardiograms (ECGs) should be collected according to the SoA.

Electrocardiograms will initially be interpreted by a qualified physician (the investigator or qualified designee) at the site as soon after the time of ECG collection as possible, and ideally while the participant is still present, for immediate participant management, should any clinically relevant findings be identified. Any clinically significant findings from ECGs that result in a diagnosis should be reported to Lilly or its designee as an AE via the eCRF.

All digital ECGs will be obtained using centrally provided ECG machines and will be electronically transmitted to a designated central ECG laboratory. The central ECG laboratory will perform a basic quality control check (for example, demographics and study details) and then store the ECGs in a database. At a future time, the stored ECG data may be overread by a cardiologist at the central ECG laboratory for further evaluation of machine-read measurements or to meet regulatory requirements. The machine-read ECG intervals and heart rate may be used for

data analysis and report-writing purposes, unless a cardiology overreading of the ECGs is conducted prior to completion of the final study report (in which case, the overread data would be used).

#### 8.2.4. Clinical Safety Laboratory Assessments

- See Section 10.2, Appendix 2: “Clinical Laboratory Tests” for the list of clinical laboratory tests to be performed and to the SoA for the timing and frequency.

*Note:* see Section 10.2 Appendix 2: “Clinical Laboratory Tests” for clinical laboratory tests reported or not reported to the investigator

- The investigator must review the laboratory results, document this review, and report any clinically relevant changes occurring during the study as an AE. The laboratory results must be retained with source documents unless a Source Document Agreement or comparable document cites an electronic location that accommodates the expected retention duration. Clinically significant abnormal laboratory findings are those which are not associated with the underlying disease, unless judged by the investigator to be more severe than expected for the participant's condition.
- All laboratory tests with values considered clinically significantly abnormal during participation in the study or within 4 weeks after the last dose of study intervention should be repeated until the values return to normal or most recent baseline or are no longer considered clinically significant by the investigator or medical monitor.
  - If such values do not return to normal/most recent baseline within a period of time judged reasonable by the investigator, the etiology should be identified and the sponsor notified.
  - All protocol-required laboratory assessments, as defined in Section 10.2, must be conducted in accordance with the SoA, standard collection requirements, and laboratory manual.
- If laboratory values from non-protocol specified laboratory assessments performed at an investigator-designated local laboratory require a change in participant management or are considered clinically significant by the investigator (for example, SAE, AE, or dose modification), then report the information as an AE.

Repeat or unscheduled samples may be taken for safety reasons or for technical issues with the samples. Unless otherwise stated in the subsections below, all samples collected for specified laboratory tests will be destroyed within 60 days of receipt of confirmed test results. Certain samples may be retained for a longer period, if necessary, to comply with applicable laws, regulations, or laboratory certification standards.

### 8.2.5. Safety Monitoring

Lilly will periodically review evolving aggregate safety data within the study by appropriate methods. The study team will review safety reports in a blinded fashion according to the schedule provided in the Trial-Level Safety Review plan. Lilly will also review SAEs within time frames mandated by company procedures. The Lilly CRP will, as appropriate, consult with the functionally independent Global Patient Safety therapeutic area physician or clinical scientist.

#### 8.2.5.1. Hepatic Safety Monitoring

##### Close Hepatic Monitoring

Laboratory tests (Section 10.6, Appendix 6), including ALT, AST, ALP, TBL, direct bilirubin, gamma-glutamyl transferase, and creatine kinase, should be repeated within 48 to 72 hours to confirm the abnormality and to determine if it is increasing or decreasing, if 1 or more of these conditions occur:

| If a participant with baseline results of... | develops the following elevations:                                     |
|----------------------------------------------|------------------------------------------------------------------------|
| ALT or AST <1.5X ULN                         | ALT or AST $\geq$ 3X ULN                                               |
| ALP <1.5X ULN                                | ALP $\geq$ 2X ULN                                                      |
| TBL <1.5X ULN                                | TBL $\geq$ 2X ULN (except for patients with Gilbert's syndrome)        |
| ALT or AST $\geq$ 1.5X ULN                   | ALT or AST $\geq$ 2X baseline                                          |
| ALP $\geq$ 1.5X ULN                          | ALP $\geq$ 2X baseline                                                 |
| TBL $\geq$ 1.5X ULN                          | TBL $\geq$ 1.5X baseline (except for patients with Gilbert's syndrome) |

Abbreviations: ALP = alkaline phosphatase; ALT = alanine aminotransferase; AST = aspartate aminotransferase; TBL = total bilirubin level; ULN = upper limit of normal.

**Note:** In this study baseline may refer to lead-in enrollment visits or randomization visit, whichever is the most recent point of reference.

If the abnormality persists or worsens, clinical and laboratory monitoring, and evaluation for possible causes of abnormal liver tests should be initiated by the investigator in consultation with the Lilly-designated medical monitor. At a minimum, this evaluation should include physical examination and a thorough medical history, including symptoms, recent illnesses (for example, heart failure, systemic infection, hypotension, or seizures), recent travel, history of concomitant medications (including over-the-counter), herbal and dietary supplements, and history of alcohol drinking and other substance abuse.

Initially, monitoring of symptoms and hepatic biochemical tests should be done at a frequency of 1 to 3 times weekly, based on the participant's clinical condition and hepatic biochemical tests.

Subsequently, the frequency of monitoring may be lowered to once every 1 to 2 weeks, if the participant's clinical condition and lab results stabilize. Monitoring of ALT, AST, ALP, and TBL should continue until levels normalize or return to approximate baseline levels.

### Comprehensive Hepatic Evaluation

A comprehensive evaluation should be performed to search for possible causes of liver injury if one or more of these conditions occur:

| If a participant with baseline results of... | develops the following elevations:                                                                  |
|----------------------------------------------|-----------------------------------------------------------------------------------------------------|
| ALT or AST <1.5X ULN                         | ALT or AST $\geq 3X$ ULN with hepatic signs/symptoms*, or ALT or AST $\geq 5X$ ULN                  |
| ALP <1.5X ULN                                | ALP $\geq 3X$ ULN                                                                                   |
| TBL <1.5X ULN                                | TBL $\geq 2X$ ULN (except for patients with Gilbert's syndrome)                                     |
| ALT or AST $\geq 1.5X$ ULN                   | ALT or AST $\geq 2X$ baseline with hepatic signs/symptoms*, <u>or</u> ALT or AST $\geq 3X$ baseline |
| ALP $\geq 1.5X$ ULN                          | ALP $\geq 2X$ baseline                                                                              |
| TBL $\geq 1.5X$ ULN                          | TBL $\geq 2X$ baseline (except for patients with Gilbert's syndrome)                                |

Abbreviations: ALP = alkaline phosphatase; ALT = alanine aminotransferase; AST = aspartate aminotransferase; TBL = total bilirubin level; ULN = upper limit of normal.

\* Hepatic signs/symptoms are severe fatigue, nausea, vomiting, jaundice, right upper quadrant abdominal pain, fever, rash, and/or eosinophilia >5%.

**Note:** In this study baseline may refer to lead-in enrollment visits or randomization visit, whichever is the most recent point of reference.

At a minimum, this evaluation should include physical examination and a thorough medical history, as outlined above, as well as tests for prothrombin-time-INR; tests for viral hepatitis A, B, C, or E; tests for autoimmune hepatitis; and an abdominal imaging study (for example, ultrasound or computed tomography (CT) scan).

Based on the participant's history and initial results, further testing should be considered in consultation with the Lilly-designated medical monitor, including tests for hepatitis D virus, cytomegalovirus, Epstein-Barr virus, acetaminophen levels, acetaminophen protein adducts, urine toxicology screen, Wilson's disease, blood alcohol levels, urinary ethyl glucuronide, and blood phosphatidylethanol. Based on the circumstances and the investigator's assessment of the participant's clinical condition, the investigator should consider referring the participant for a hepatologist or gastroenterologist consultation, magnetic resonance cholangiopancreatography, endoscopic retrograde cholangiopancreatography, cardiac echocardiogram, or a liver biopsy.



### **Additional Hepatic Data Collection (Hepatic Safety CRF) in Study Participants Who Have Abnormal Liver Tests During the Study**

Additional hepatic safety data collection in hepatic safety case report forms (CRFs) should be performed in study participants who meet 1 or more of the following 5 conditions:

1. Elevation of serum ALT to  $\geq 5X$  ULN on 2 or more consecutive blood tests (if baseline ALT  $< 1.5X$  ULN)
  - In participants with baseline ALT  $\geq 1.5X$  ULN, the threshold is ALT  $\geq 3X$  baseline on 2 or more consecutive tests
2. Elevated TBL to  $\geq 2X$  ULN (if baseline TBL  $< 1.5X$  ULN) (except for cases of known Gilbert's syndrome)
  - In participants with baseline TBL  $\geq 1.5X$  ULN, the threshold should be TBL  $\geq 2X$  baseline
3. Elevation of serum ALP to  $\geq 2X$  ULN on 2 or more consecutive blood tests (if baseline ALP  $< 1.5X$  ULN)
  - In participants with baseline ALP  $\geq 1.5X$  ULN, the threshold is ALP  $\geq 2X$  baseline on 2 or more consecutive blood tests
4. Hepatic event considered to be an SAE
5. Discontinuation of intensive lifestyle intervention or study drug intervention due to a hepatic event

**Note:** the interval between the 2 consecutive blood tests should be at least 2 days.

**Note:** In this study baseline may refer to lead-in enrollment visits or randomization visit, whichever is the most recent point of reference.

#### **8.2.6. Depression, Suicidal Ideation and Behavior Risk Monitoring**

Patients who have obesity or are overweight are at increased risk for depression (Luppino et al. 2010). Depression can increase the risk for suicidal ideation and behavior. Therefore, study participants will be screened at trial entry and monitored during the study for depression, suicidal ideation and behavior.

Participants should be monitored appropriately and observed closely for suicidal ideation and behavior or any other unusual changes in behavior, especially at the beginning and end of the course of treatment, or at the time of dose changes, either increases or decreases. Consideration should be given to discontinuing intensive lifestyle intervention or the study drug intervention in participants who experience signs of suicidal ideation or behavior, following a risk assessment (Section 7.1).

Baseline and treatment emergent assessment of depression, suicidal ideation and behavior will be monitored during the study using the C-SSRS and PHQ-9 (Section 8.3.2.13).

### **8.3. Adverse Events, Serious Adverse Events, and Product Complaints**

The definitions of the following events can be found in Section 10.4 (Appendix 4):

- Adverse events (AEs)



- Serious adverse events (SAEs)
- Product complaints (PCs)

These events will be reported by the participant (or, when appropriate, by a caregiver, surrogate, or the participant's legally authorized representative).

The investigator and any qualified designees are responsible for detecting, documenting, and recording events that meet these definitions and remain responsible for following up events that are serious, considered related to the study drug intervention, or study procedures (for example, intensive lifestyle intervention), or that caused the participant to discontinue the study intervention (see Section 7).

Care will be taken not to introduce bias when detecting events. Open-ended and non-leading verbal questioning of the participant is the preferred method to inquire about event occurrences.

After the initial report, the investigator is required to proactively follow each participant at subsequent visits/contacts. All SAEs, will be followed until resolution, stabilization, the event is otherwise explained, or the participant is lost to follow-up (as defined in Section 7.3). For product complaints, the investigator is responsible for ensuring that follow-up includes any supplemental investigations as indicated to elucidate the nature and/or causality. Further information on follow-up procedures is provided in Section 10.4 (Appendix 4).

**8.3.1. Timing and Mechanism for Collecting Events**

This table describes the timing, deadlines, and mechanism for collecting events.

| Event                                                                                                                               | Collection Start                           | Collection Stop                                                | Timing for Reporting to Sponsor or Designee | Mechanism for Reporting | Back-up Method of Reporting |
|-------------------------------------------------------------------------------------------------------------------------------------|--------------------------------------------|----------------------------------------------------------------|---------------------------------------------|-------------------------|-----------------------------|
| <b>Adverse Event</b>                                                                                                                |                                            |                                                                |                                             |                         |                             |
| AE                                                                                                                                  | signing of the informed consent form (ICF) | the safety follow-up visit OR participation in study has ended | As soon as possible upon site awareness     | AE eCRF                 | N/A                         |
| <b>Serious Adverse Event</b>                                                                                                        |                                            |                                                                |                                             |                         |                             |
| SAE and SAE updates – prior to start of study drug intervention <b>and</b> deemed reasonably possibly related with study procedures | signing of the informed consent form (ICF) | start of study drug intervention                               | Within 24 hours of awareness                | SAE eCRF                | SAE paper form              |

| <b>Event</b>                                                                                      | <b>Collection Start</b>                           | <b>Collection Stop</b>                                                                                                                      | <b>Timing for Reporting to Sponsor or Designee</b> | <b>Mechanism for Reporting</b> | <b>Back-up Method of Reporting</b> |
|---------------------------------------------------------------------------------------------------|---------------------------------------------------|---------------------------------------------------------------------------------------------------------------------------------------------|----------------------------------------------------|--------------------------------|------------------------------------|
| SAE and SAE updates – after start of study drug intervention                                      | start of study drug intervention                  | The safety follow-up visit OR participation in study has ended                                                                              | Within 24 hours of awareness                       | SAE eCRF                       | SAE paper form                     |
| SAE – after participant’s study participation has ended <b>and</b> the investigator becomes aware | After participant’s study participation has ended | N/A                                                                                                                                         | Promptly                                           | SAE paper form                 | N/A                                |
| <b>Pregnancy</b>                                                                                  |                                                   |                                                                                                                                             |                                                    |                                |                                    |
| Pregnancy in female participants and female partners of male participants                         | After the start of study intervention             | Four months after the last injection for female partners of male participants and 2 months after the last injection for female participants | Within 24 hours of learning of the pregnancy       | eCRF                           | SAE paper form                     |
| <b>Product Complaints</b>                                                                         |                                                   |                                                                                                                                             |                                                    |                                |                                    |
| PC associated with an SAE or might have led to an SAE                                             | Start of study drug intervention                  | End of study drug intervention                                                                                                              | Within 24 hours of awareness                       | Product Complaint form         | N/A                                |
| PC not associated with an SAE                                                                     | Start of study drug intervention                  | End of study drug intervention                                                                                                              | Within 1 business day of awareness                 | Product Complaint form         | N/A                                |

| Event                                                                                     | Collection Start                                  | Collection Stop | Timing for Reporting to Sponsor or Designee | Mechanism for Reporting                                                                           | Back-up Method of Reporting |
|-------------------------------------------------------------------------------------------|---------------------------------------------------|-----------------|---------------------------------------------|---------------------------------------------------------------------------------------------------|-----------------------------|
| Updated PC information                                                                    | —                                                 | —               | As soon as possible upon site awareness     | Originally completed Product Complaint form with all changes signed and dated by the investigator | N/A                         |
| PC (after participant's study participation has ended and the investigator becomes aware) | After participant's study participation has ended | N/A             | Promptly                                    | Product Complaint form                                                                            | N/A                         |

Abbreviations: AE = adverse event; eCRF = electronic case report form; N/A = not applicable; PC = product complaint; SAE = serious adverse event.

### 8.3.2. Special Safety Topics

#### 8.3.2.1. Hypoglycemia

Upon ICF signing, all participants will be educated about signs and symptoms of hypoglycemia, how to treat hypoglycemia, and how to collect appropriate information for each episode of hypoglycemia.

Hypoglycemia may be identified by spontaneous reporting of symptoms from participants (whether confirmed or unconfirmed by simultaneous glucose values) or by blood glucose (BG) samples collected during study visits.

All participants who develop diabetes during the study will be provided with glucometers. Participants without diabetes may be given glucometers to assist in the evaluation of reported symptoms consistent with hypoglycemia at the investigator's discretion. Participants receiving glucometers will be provided a diary to record relevant information (for example, glucose values, symptoms).

All hypoglycemic episodes will be recorded on a specific eCRF (Hypoglycemic Events eCRF) and should not be recorded on the AE eCRF, unless the event meets serious criteria. If a hypoglycemic event meets severe criteria (see definition below), it should be recorded as serious on the AE and SAE eCRFs, and reported to Lilly as an SAE. All hypoglycemic events collected on the hypoglycemic eCRF will be considered as treatment-emergent (TE) and included in the analysis of incidence and rate of hypoglycemic events.

Investigators should use the following definitions and criteria when diagnosing and categorizing an episode considered to be related to hypoglycemia (the BG values in this section refer to values determined by a laboratory or International Federation of Clinical Chemistry and Laboratory Medicine blood-equivalent glucose meters and strips) in accordance with the 2020 American Diabetes Association position statement on glycemic targets (ADA 2020):

***Glucose Alert Value (Level 1):***

- **Documented symptomatic hypoglycemia** is defined as any time a patient feels that he or she is experiencing symptoms and/or signs associated with hypoglycemia and has a BG level of <70 mg/dL (<3.9 mmol/L).
- **Documented asymptomatic hypoglycemia** is defined as any event not accompanied by typical symptoms of hypoglycemia, but with a measured BG <70 mg/dL (<3.9 mmol/L).
- **Documented unspecified hypoglycemia** is defined as any event with no information about symptoms of hypoglycemia available, but with a measured BG <70 mg/dL (<3.9 mmol/L).

***Clinically Significant Hypoglycemia (Level 2):***

- **Documented symptomatic hypoglycemia** is defined as any time a participant feels that he or she is experiencing symptoms and/or signs associated with hypoglycemia and has a BG level of <54 mg/dL (<3.0 mmol/L).
- **Documented asymptomatic hypoglycemia** is defined as any event not accompanied by typical symptoms of hypoglycemia but with a measured BG <54 mg/dL (<3.0 mmol/L).
- **Documented unspecified hypoglycemia** is defined as any event with no information about symptoms of hypoglycemia available but with a measured BG <54 mg/dL (<3.0 mmol/L).

***Severe hypoglycemia (Level 3):***

- **Severe hypoglycemia** is defined as an episode with severe cognitive impairment requiring the assistance of another person to actively administer carbohydrate, glucagon, or other resuscitative actions. These episodes may be associated with sufficient neuroglycopenia to induce seizure or coma. Blood glucose measurements may not be available during such an event, but neurological recovery attributable to the restoration of BG to normal is considered sufficient evidence that the event was induced by a low BG concentration.

To avoid duplicate reporting, all consecutive BG values <70 mg/dL (<3.9 mmol/L) occurring within a 1-hour period may be considered to be a single hypoglycemic event (Weinberg et al. 2010; Danne et al. 2013).

### **8.3.2.2. Pancreatitis**

***Diagnosis of Acute Pancreatitis***

Acute pancreatitis is an AE of interest in all studies with tirzepatide, including this study. The diagnosis of acute pancreatitis requires 2 of the following 3 features (Banks et al. 2006; Koizumi 2006):

- abdominal pain, characteristic of acute pancreatitis (that is, epigastric pain radiating to the back, often associated with nausea and vomiting)
- serum amylase (total, pancreatic, or both) and/or lipase  $\geq 3X$  ULN
- characteristic findings of acute pancreatitis on CT scan or magnetic resonance imaging (MRI)

If acute pancreatitis is suspected, the investigator should

- obtain appropriate laboratory tests, including pancreatic amylase (p-amylase) and lipase
- perform imaging studies, such as abdominal CT scan with or without contrast, abdominal MRI, or gallbladder ultrasound

**Note:** Abdominal ultrasound may be used as an alternative method only if CT and MRI cannot be performed.

- evaluate for possible causes of acute pancreatitis, including alcohol use, gallstone/gallbladder disease, hypertriglyceridemia, and concomitant medications.

#### ***Discontinuation for Acute Pancreatitis***

If acute pancreatitis is diagnosed after randomization, the participant must discontinue use of the IP, but will continue in the study.

#### ***Case Adjudication and Data Entry***

An independent clinical endpoint committee (CEC) will adjudicate all suspected cases of acute pancreatitis. In addition, AEs of severe or serious abdominal pain of unknown etiology will also be submitted to the adjudication committee to assess for possible pancreatitis or other pancreatic disease.

#### ***Asymptomatic Elevation of Pancreatic Amylase and/or Lipase***

Serial measures of pancreatic enzymes have limited clinical value for predicting episodes of acute pancreatitis in asymptomatic patients (Nauck et al. 2017; Steinberg et al. 2017a, 2017b). Therefore, further diagnostic follow-up of cases of asymptomatic elevation of pancreatic enzymes (lipase and/or p-amylase  $\geq 3X$  ULN) is not mandated but may be performed based on the investigator's clinical judgment and assessment of the participant's overall clinical condition.

#### **8.3.2.3. Thyroid Malignancies and C-Cell Hyperplasia**

Individuals with personal or family history of MTC and/or MEN syndrome type 2 will be excluded from the study. Participants who are diagnosed with MTC and/or MEN syndrome type 2 during the study will have intensive lifestyle intervention or study drug intervention stopped and should continue follow-up with an endocrinologist.

The assessment of thyroid safety during the trial will include reporting of any case of thyroid malignancy (including MTC, papillary carcinoma and others) and measurements of calcitonin. These data will be captured in specific eCRFs. The purpose of calcitonin measurements is to assess the potential of tirzepatide to affect thyroid C-cell function, which may indicate development of C-cell hyperplasia and neoplasms.

#### 8.3.2.4. Calcitonin Measurements

If an increased calcitonin value (see definitions below) is observed in a participant who has been administered a medication that is known to increase serum calcitonin, then this medication should be stopped, and calcitonin levels should be measured after an appropriate washout period.

For participants who require additional endocrine assessment because of increased calcitonin concentration as defined in this section, data from the follow-up assessment will be collected in the specific section of the eCRF.

##### ***Calcitonin Measurements in Participants with eGFR $\geq 60$ mL/min/1.73 m<sup>2</sup>***

A significant increase in calcitonin for participants with eGFR  $\geq 60$  mL/min/1.73 m<sup>2</sup> is defined below. If a participant's laboratory results meet these criteria, these clinically significant laboratory results should be recorded as an AE.

- *Serum calcitonin value  $\geq 20$  ng/L and  $< 35$  ng/L AND  $\geq 50\%$  increase from the baseline value.* These participants will be asked to repeat the measurement within 1 month. If this repeat value is increasing ( $\geq 10\%$  increase), the study drug should be stopped, and the participant encouraged to undergo additional endocrine assessment and longer term, follow-up by an endocrinologist to exclude any serious adverse effect on the thyroid.
- *Serum calcitonin value  $\geq 35$  ng/L AND  $\geq 50\%$  over the baseline value.* In these participants, study drug should be stopped, and the participant recommended to immediately undergo additional endocrine assessments and longer term, follow-up by an endocrinologist.

##### ***Calcitonin Measurement in Participants with eGFR $< 60$ mL/min/1.73 m<sup>2</sup>***

A significant increase in calcitonin for participants with eGFR  $< 60$  mL/min/1.73 m<sup>2</sup> is defined as a *serum calcitonin value  $\geq 35$  ng/L AND  $\geq 50\%$  over the baseline value.* If a participant's labs meet these criteria, these clinically significant labs should be recorded as an AE.

In these participants, study drug should be discontinued (after first confirming the value) and the participant recommended to immediately undergo additional endocrine assessments and longer term, follow-up by an endocrinologist to exclude any serious adverse effect on the thyroid.

**Note:** In this study baseline may refer to lead-in enrollment visits or randomization visit, whichever is the most recent point of reference.

#### 8.3.2.5. Major Adverse Cardiovascular Events

Deaths and nonfatal cardiovascular AEs will be adjudicated by a committee of physicians external to Lilly with cardiology expertise. This committee will be blinded to treatment assignment. The nonfatal cardiovascular AEs to be adjudicated include

- myocardial infarction
- hospitalization for unstable angina
- hospitalization for heart failure
- coronary interventions (such as coronary artery bypass graft or percutaneous coronary intervention), and
- cerebrovascular events, including cerebrovascular accident (stroke) and transient ischemic attack.

### **8.3.2.6. Supraventricular Arrhythmias and Cardiac Conduction Disorders**

Treatment-emergent cardiac conduction disorders will be further evaluated. Participants who develop any event from these groups of disorders should undergo an ECG, which should be submitted to the central reading center. Additional diagnostic tests to determine exact diagnosis should be performed, as needed. The specific diagnosis will be recorded as an AE. Events that meet criteria for serious conditions as described in Section 10.4 must be reported as SAEs.

### **8.3.2.7. Hypersensitivity Reactions**

Many drugs, but particularly biologic agents, carry the risk of systemic hypersensitivity reactions. If such a reaction occurs, additional data describing each symptom should be provided to the sponsor in the eCRF.

Sites should have appropriately trained medical staff and appropriate medical equipment available when study participants are receiving study drug. It is recommended that participants who experience a systemic hypersensitivity reaction be treated per national and international guidelines.

In the case of generalized urticaria or anaphylaxis, additional blood and urine samples should be collected as described in Section 10.3, Appendix 3, "Laboratory Testing for Hypersensitivity Events". Laboratory results are provided to the sponsor via the central laboratory.

### **8.3.2.8. Injection-Site Reactions**

Symptoms of a local injection-site reaction may include erythema, induration, pain, pruritus, and edema. If an injection site event is reported, the AE will be recorded, and additional data will be provided to the sponsor in the eCRF.

Injection site reactions will be collected on the eCRF separate from the hypersensitivity reaction eCRF. At the time of AE occurrence, samples will be collected for measurement of tirzepatide antidrug antibodies (ADA) and tirzepatide concentration.

### **8.3.2.9. Antidrug Antibodies**

The occurrence of ADA formation will be assessed as outlined in Section 8.9.

### **8.3.2.10. Hepatobiliary Disorders**

All events of TE biliary colic, cholecystitis, or other suspected events related to gallbladder disease should be evaluated and additional diagnostic tests performed, as needed. In cases of elevated liver markers, hepatic monitoring should be initiated as outlined in Section 8.2.5.1.

### **8.3.2.11. Severe Gastrointestinal Adverse Events**

Tirzepatide may cause severe GI AEs, such as nausea, vomiting, and diarrhea. Information about severe GI AEs as well as antiemetic/antidiarrheal use will be collected in the eCRF/AE form. For detailed information concerning the management of GI AEs, please refer to Section 6.6.2.

### **8.3.2.12. Acute Renal Events**

Renal safety will be assessed based on repeated renal function assessment as well as assessment of AEs suggestive of acute or worsening of chronic renal failure. Gastrointestinal AEs have been reported with tirzepatide, including nausea, diarrhea, and vomiting. This is consistent with other

GLP-1R agonists (Aroda and Ratner 2011). The events may lead to dehydration, which could cause a deterioration in renal function, including acute renal failure. Participants should be advised to notify investigators in case of severe nausea, frequent vomiting, or symptoms of dehydration.

### **8.3.2.13. Depression, Suicidal Ideation or Behavior Monitoring**

Participants will be monitored for depression and suicidal ideation or behavior through AE collection and by using the C-SSRS and the PHQ-9. Participants will be referred to an MHP if in the opinion of the investigator it is necessary for the safety of the participant or if the participant had any of the following:

- a PHQ-9 score  $\geq 15$
- C-SSRS responses of
  - A “yes” answer to Question 4 (Active Suicidal Ideation with Some Intent to Act, Without Specific Plan) on the “Suicidal Ideation” portion of the C-SSRS
  - or**
  - A “yes” answer to Question 5 (Active Suicidal Ideation with Specific Plan and Intent) on the “Suicidal Ideation” portion of the C-SSRS
  - or**
  - A “yes” answer to any of the suicide-related behaviors (actual attempt, interrupted attempt, aborted attempt, preparatory act, or behavior) on the “Suicidal Behavior” portion of the C-SSRS

## **8.4. Treatment of Overdose**

Study drug overdose (more than the specified number of injections) will be reported as an AE. In the event of overdose, refer to the IB for tirzepatide.

## **8.5. Pharmacokinetics**

Not applicable.

## **8.6. Pharmacodynamics**

Samples to assess the PD properties of tirzepatide are included in the efficacy measures and not applicable in this section.

## **8.7. Genetics**

A whole blood sample will be collected for pharmacogenetic analysis as specified in the SoA (Section 1.3) where local regulations allow.

Samples will not be used to conduct unspecified disease or population genetic research either now or in the future. Samples will be used to investigate variable response to tirzepatide and to investigate genetic variants thought to play a role in obesity. Assessment of variable response may include evaluation of AEs or differences in efficacy.

All samples will be coded with the participant number. These samples and any data generated can be linked back to the participant only by the investigator site personnel.



Samples will be retained at a facility selected by Lilly or its designee for a maximum of 15 years after the last participant visit for the study, or for a shorter period if local regulations and/or Ethical Review Boards (ERBs)/ Institutional Review Boards (IRBs) impose shorter time limits. This retention period enables use of new technologies, response to regulatory questions, and investigation of variable response that may not be observed until later in the development of tirzepatide or after tirzepatide become(s) commercially available.

Molecular technologies are expected to improve during the 15-year storage period and therefore cannot be specifically named. However, existing approaches include whole genome or exome sequencing, genome wide association studies, and candidate gene studies. Regardless of technology utilized, genotyping data generated will be used only for the specific research scope described in this section.

## **8.8. Biomarkers**

Biomarker research is performed to address questions of relevance to drug disposition, target engagement, PD, mechanism of action, variability of participant response (including safety), and clinical outcome. Sample collection is incorporated into clinical studies to enable examination of these questions through measurement of biomolecules including deoxyribonucleic acid (DNA), proteins, lipids, and other cellular elements.

Serum and plasma samples for biomarker research (non-pharmacogenetic stored sample) will be collected at the times specified in the SoA (Section 1.3) where local regulations allow.

Samples will be used for research on the drug target, disease process, variable response to tirzepatide, pathways associated with obesity, mechanism of action of tirzepatide, and/or research method or in validating diagnostic tools or assay(s) related to obesity.

All samples will be coded with the participant number. These samples and any data generated can be linked back to the participant only by the investigator site personnel.

Samples will be retained at a facility selected by Lilly or its designee for a maximum 15 years after the last participant visit for the study, or for a shorter period if local regulations and ERBs impose shorter time limits. This retention period enables use of new technologies, response to regulatory questions, and investigation of variable response that may not be observed until later in the development of tirzepatide or after tirzepatide become(s) commercially available.

## **8.9. Immunogenicity Assessments**

Where local regulations and ERBs allow, blood samples for immunogenicity testing will be collected to determine antibody production against tirzepatide as specified in the SoA (Section 1.3).

For immunogenicity testing, venous blood samples will be collected from each participant according to the SoA (Section 1.3) to determine antibody production against tirzepatide. To interpret the results of immunogenicity, a PK sample will be collected at the same time points as the immunogenicity sample. All samples for immunogenicity should be taken predose when applicable and possible.

In the event of systemic drug hypersensitivity reactions (immediate or nonimmediate), additional unscheduled samples will be collected as detailed in Section 8.3.2.7 (Hypersensitivity Reactions).

Instructions for the collection and handling of blood samples will be provided by the sponsor. The actual date and time (24-hour clock time) of each sampling will be recorded. Samples collected at Visit 801 will assess immunogenicity at washout of tirzepatide (5 half-lives post end of treatment).

Immunogenicity will be assessed by a validated assay designed to detect ADAs in the presence of tirzepatide at a laboratory approved by the sponsor. Antibodies may be further characterized for their ability to neutralize the activity of tirzepatide on GIP and GLP-1 receptors. Positive tirzepatide ADA samples will be tested for cross-reactivity with native GIP and GLP-1, and, if positive, may then be tested for neutralizing antibodies against native GIP and/or GLP-1. In vivo laboratory indicators for effect on weight loss and PK will be utilized to detect potential neutralizing effect of ADA against tirzepatide.

Treatment-emergent ADAs are defined in Section 9.4.6.

Samples will be retained for a maximum of 15 years after the last participant visit, or for a shorter period if local regulations and ERBs allow, at a facility selected by the sponsor. The duration allows the sponsor to respond to future regulatory requests related to tirzepatide. Any samples remaining after 15 years will be destroyed.

Concentrations of tirzepatide will be assayed using a validated liquid chromatography mass spectrometry method. Bioanalytical samples collected to measure tirzepatide concentrations will be retained for a maximum of 1 year following last subject visit for the study. During this time, samples remaining after the bioanalyses may be used for exploratory analyses such as metabolism work, protein binding, and/or bioanalytical method cross-validation.

## **8.10. Health Economics**

Health Economics parameters are not evaluated in this study.

## 9. Statistical Considerations

### 9.1. Statistical Hypotheses

The alternative hypothesis for the primary objective is the following:

H<sub>1</sub>: QW tirzepatide MTD is superior to placebo for mean percent change in body weight AND proportion of participants who achieve  $\geq 5\%$  body weight reduction from randomization to 72 weeks.

The above hypothesis will be tested at 2-sided significance level of 0.05.

The alternative hypotheses for the key secondary objectives controlling for type 1 error rate are the following:

H<sub>2</sub>: QW tirzepatide MTD is superior to placebo for percentage of participants who maintain  $\geq 80\%$  of the body weight lost during the 12-week lead-in period.

H<sub>3</sub>: QW tirzepatide MTD is superior to placebo for proportion of participants who achieve  $\geq 10\%$  body weight reduction from randomization to 72 weeks.

H<sub>4</sub>: QW tirzepatide MTD is superior to placebo for proportion of participants who achieve  $\geq 15\%$  body weight reduction from randomization to 72 weeks.

H<sub>5</sub>: QW tirzepatide MTD is superior to placebo for mean change in waist circumference (cm) from randomization to 72 weeks.

### 9.2. Sample Size Determination

Approximately 1100 participants will be screened and 800 participants enrolled into the 12-week lead-in period in order to achieve approximately 600 participants randomly assigned to study drug intervention (300 participants per treatment group).

The sample size determination assumes that evaluation of superiority of tirzepatide MTD (10 mg or 15 mg) to placebo will be conducted at a 2-sided significance level of 0.05 using a 2-sample t-test. Additionally, a difference of at least 12% mean body weight percentage reduction from randomization at 72 weeks for tirzepatide MTD compared to placebo, a common SD of 10%, and a dropout rate of 25% are assumed for statistical power calculations. Under the assumptions above, randomizing 600 participants in a 1:1 ratio to MTD (300 participants) and placebo (300 participants) provides more than 90% power to demonstrate superiority of tirzepatide MTD to placebo.

The chosen sample size and randomization ratio also provides  $>90\%$  power to establish superiority of tirzepatide MTD to placebo in terms of proportion of participants achieving at least 5% body weight reduction from randomization at 72 weeks, based on a Chi-square test at a 2-sided significance level of 0.05, assuming 20% placebo treated participants and 46% tirzepatide treated participants achieve the goal and a dropout rate of 25%.

### 9.3. Populations for Analyses

For purposes of analysis, the following populations are defined:

| Population                      | Description                                                                                                                                                              |
|---------------------------------|--------------------------------------------------------------------------------------------------------------------------------------------------------------------------|
| Entered                         | All participants who sign informed consent                                                                                                                               |
| Enrolled                        | All participants who are enrolled in 12-week lead-in period                                                                                                              |
| Randomized                      | All participants who are randomly assigned a study drug.                                                                                                                 |
| Modified Intent-to-Treat (mITT) | All randomly assigned participants who are exposed to at least 1 dose of study drug. Participants will be included in the treatment group to which they were randomized. |
| Efficacy Analysis Set (EAS)     | Data obtained during the double-blind treatment period from the mITT population, excluding data after discontinuation of study drug (last dose date + 7 days)            |
| Full Analysis Set (FAS)         | Data obtained during the treatment period from mITT population, regardless of adherence to study drug.                                                                   |
| Safety Analysis Set (SS)        | Data obtained during the treatment plus follow up period from the mITT population, regardless of adherence to study drug.                                                |

### 9.4. Statistical Analyses

#### 9.4.1. General Considerations

Statistical analysis of this study will be the responsibility of Lilly or its designee. Any change to the data analysis methods described in the protocol will require an amendment ONLY if it changes a principal feature of the protocol. Any other change to the data analysis methods described in the protocol, and the justification for making the change, will be described in the statistical analysis plan (SAP) or the clinical study report (CSR). Additional exploratory data analyses may be conducted as deemed appropriate.

Unless otherwise noted, all tests of treatment effects will be conducted at a 2-sided alpha level of 0.05, and the confidence interval (CI) will be calculated at 95%, 2-sided. In statistical summaries and analyses, data will be analyzed as randomized.

Unless specified otherwise, efficacy analyses will be conducted using efficacy analysis set (EAS) and safety analyses will be conducted using safety analysis set (SS).

Unless otherwise specified, for analyses in the double-blind period, baseline is defined as the last non-missing data collected prior to or at randomization (prior to first dosing of study drug); for analyses in the lead-in period, baseline is defined as the last non-missing data collected prior to or at study entry (Visit 1 and Visit 2).

Summary statistics for continuous measures will include sample size, mean, SD, median, minimum, and maximum. The analysis model to make comparisons among treatment groups relative to continuous measurements assessed over time will be a mixed model for repeated measures (MMRM), with terms of treatment, visit, treatment-by-visit interaction, stratification factors and baseline measurement as a covariate. An unstructured covariance structure will model relationship of within-patient errors.

Kaplan-Meier method will be used for estimation of cumulative event-free survival rates over time, and cox proportional hazards regression analysis will be used to compare hazard rates among treatments.

Summary statistics for categorical measures (including categorized continuous measures) will include sample size, frequency, and percentages. Logistic regression will be used to examine the treatment difference in binary efficacy outcomes if there is a need to adjust for covariates. Otherwise, Fisher's exact test will be used to examine the treatment difference in categorical outcomes.

Summary statistics for discrete count measures will include sample size, mean, SD, median, minimum, and maximum. The negative binomial regression model will be used for the treatment comparison of discrete count measures.

Other statistical methods may be used, as appropriate, and details will be described in the SAP.

#### **9.4.2. Treatment Group Comparability**

##### **9.4.2.1. Participant Disposition**

A detailed description of participant disposition will be provided at the end of the study.

Frequency counts and percentages of all participants screened, enrolled, randomized, and receiving at least 1 dose of study drug will be summarized by treatment group. Of the randomized population, frequency counts and percentages of participants who completed the study, prematurely discontinued the study (and/or study drug), including reason for premature discontinuation, will be summarized by treatment group.

A Kaplan-Meier analysis of time from randomization to premature discontinuation from study and/or study treatment by treatment group will be provided.

##### **9.4.2.2. Participant Characteristics**

Demographics will be summarized for all enrolled participants.

Demographics will also be summarized by treatment group for all randomized participants.

##### **9.4.2.3. Concomitant Therapy**

Concomitant medication, including previous therapy, will be summarized by treatment group for all randomized participants.

##### **9.4.2.4. Treatment Compliance**

Frequency counts and percentages of participants compliant to study drug will be summarized by treatment arms and visits for FAS.

### 9.4.3. Efficacy Analyses

#### 9.4.3.1. Primary Analyses

There will be 2 estimands of interest in comparing efficacy of tirzepatide MTD with placebo. For the FDA, the primary efficacy analysis will be guided by the “hybrid” estimand and will be conducted using the FAS. This assessment will analyze percent change in body weight obtained at the 72-week visit using an analysis of covariance (ANCOVA) and the percentage of participants achieving at least 5% body weight reduction obtained at the 72-week visit using a logistic regression model. Both models (ANCOVA and logistic regression model) will include terms of treatment, stratification factors, and baseline body weight as a covariate. Missing data solely due to a pandemic or natural disaster (after other reasons for missing data are ruled out) will be considered missing at random, and missing data will be imputed using all non-missing data of the primary outcome measurement from the same treatment arm. Missing data of the primary outcome measurement due to all other Intercurrent Events (ICEs) will be imputed based on retrieved dropouts in the same treatment arm, defined as observed primary outcome measurements from participants in the same treatment group who had their efficacy assessed after early discontinuation of study drug. In cases where there are not enough retrieved dropouts to provide a reliable imputation model (for example, the model implemented by the SAS program does not converge), an alternative multiple imputation method with reference to the placebo group (that is, placebo multiple imputation) will be used. Analysis will be conducted with multiple imputations.

For all other purposes, the primary efficacy analyses will be guided by the “efficacy” estimand, which represents efficacy prior to discontinuation of study drug, and conducted using the EAS. The primary analysis model will be an MMRM for body weight percentage change over time and a longitudinal logistic regression for proportion of participants achieving at least 5% body weight reduction over time. The response variable of the MMRM will be the percent change in body weight from baseline values obtained at each scheduled post baseline visit. The response variable of the longitudinal logistic regression will be the proportion of participants achieving at least 5% body weight reduction at each scheduled post randomization visit. The Kenward-Roger approximation will be used to estimate denominator degrees of freedom.

Since the mean percent change in body weight and proportion of participants with  $\geq 5\%$  body weight reduction needs to be achieved at the same time, no multiplicity adjustment is planned for these 2 tests.

#### 9.4.3.2. Key Secondary Efficacy Analyses

- Superiority of tirzepatide MTD to placebo for the percentage of participants who maintain  $\geq 80\%$  of the body weight lost during the 12-week lead-in period
- Superiority of tirzepatide MTD to placebo for the proportion of participants who achieve  $\geq 10\%$  body weight reduction from randomization to 72 weeks
- Superiority of tirzepatide MTD to placebo for the proportion of participants who achieve  $\geq 15\%$  body weight reduction from randomization to 72 weeks
- Superiority of tirzepatide MTD to placebo for the mean change in waist circumference (cm) from randomization to 72 weeks

Additional details, including analysis methods for key secondary endpoints and the strategy for controlling the overall Type 1 error rate at a 2-sided alpha of 0.05 of primary and key secondary endpoint evaluation, will be provided in the SAP.

#### **9.4.3.3. Other Secondary Efficacy Analyses**

All other efficacy analyses will be guided by “efficacy” estimand and will be conducted using EAS. Details will be provided in the SAP.

#### **9.4.4. Safety Analyses**

Unless specified otherwise, safety assessments will be guided by an estimand comparing the safety of tirzepatide MTD with placebo irrespective of adherence to study drug. Thus, safety analyses will be conducted using SS.

##### **9.4.4.1. Study Drug Exposure**

Study drug exposure will be calculated for each participant and summarized by treatment group.

##### **9.4.4.2. Adverse Events**

Adverse events will be coded from the actual term using the Medical Dictionary for Regulatory Activities (MedDRA) and reported with preferred terms and system organ class. Counts and proportions of participants experiencing events will be reported for each treatment group, and Fisher’s exact test will be used to compare the treatment groups.

The proportion of participants experiencing TEAE, SAE, and discontinuation due to AE (DCAE) will be summarized by treatment group.

##### **9.4.4.3. Special Safety Topics**

This section includes areas of interest whether due to observed safety findings, potential findings based on drug class, or agreed upon consultation with regulatory agencies for the reasons previously mentioned.

The following AEs are AEs of special interest (AESI) for this study:

- Severe hypoglycemia
- Major adverse cardiovascular events (adjudicated). Includes, but not limited to cardiovascular death, nonfatal myocardial infarction, nonfatal stroke, and hospitalization for heart failure
- Treatment-emergent supraventricular arrhythmias and cardiac conduction disorders
- Hepatobiliary disorders. Includes biliary colic, cholecystitis, and other gallbladder disease
- Severe GI events
- Acute renal events
- MDD/suicidal behavior and ideation
- Pancreatitis (adjudicated)
- C-cell hyperplasia and thyroid malignancies
- Allergic/hypersensitivity reactions. Includes injection site reactions and ADA formation

Summaries and analyses for the incidence of AESIs will be provided by treatment. The details of analysis of AESI will be provided in the SAP.

#### **9.4.4.4. Other Adverse Event Assessments**

##### **9.4.4.4.1. Gastrointestinal Events**

Summaries and analyses for incidence and severity of nausea, vomiting, and diarrhea will be provided by each treatment.

##### **9.4.4.4.2. Events Related to Potential Abuse Liability**

Summaries and analyses for incidence of potential abuse liability TEAEs will be provided by treatment. The details will be provided in the SAP.

##### **9.4.4.4.3. Depression, Suicidal Ideation and Behavior**

In addition to the summary of TEAEs, suicidal ideation and behavior will be assessed by C-SSRS, and depression related symptoms will be assessed using the PHQ-9.

The analysis details will be provided in the SAP.

##### **9.4.4.4.4. Central Laboratory Measures, Vital Signs, and Electrocardiograms**

Actual values and change from randomization to post randomization values of central laboratory measures, vital signs, and selected ECG parameters will be summarized at each scheduled visit. Change from randomization to post randomization value will be summarized for participants who have both a randomization and at least 1 post randomization result.

The percentages of participants with TE abnormal, high, or low measures (including laboratory, vital, and ECG parameters) at any time will be summarized and compared between treatment groups using Fisher's exact test.

The analysis details will be provided in the SAP.

#### **9.4.5. Pharmacokinetic/Pharmacodynamic Analyses**

No PK/PD analyses are planned for this study.

#### **9.4.6. Evaluation of Immunogenicity**

The frequency and percentage of participants with preexisting ADA and with TE ADA+ to tirzepatide will be tabulated. Treatment-emergent ADAs are defined as those with a titer 2-fold (1 dilution) greater than the minimum required dilution (1:10) of the ADA assay if no ADAs were detected at baseline (treatment-induced ADA) or those with a 4-fold (2 dilutions) increase in titer compared to baseline if ADAs were detected at baseline (treatment-boosted ADA). For the TE ADA+ participants, the distribution of maximum titers will be described. The frequency of neutralizing antibodies, if assessed, and cross reactivity to native GIP and GLP-1 may also be tabulated in TE ADA+ participants.

The relationship between the presence of antibodies and the PK parameters and PD response, including safety and efficacy to tirzepatide, may be assessed.



#### **9.4.7. Other Analyses**

##### **9.4.7.1. Health Outcomes**

Analyses of actual and change from randomization in the domains and/or summary scores of patient-reported outcomes questionnaires will be conducted using the EAS. The details on questionnaire-specific analyses will be provided in the SAP.

##### **9.4.7.2. Subgroup Analyses for Primary Analysis**

Details of the subgroup analyses will be provided in the SAP.

The following subgroup variables will be considered (but not limited to):

- age (<65 years and  $\geq 65$  years)
- sex (female and male)
- race
- ethnicity
- BMI at study entry (<30,  $\geq 30$  and <35,  $\geq 35$  and <40,  $\geq 40$  kg/m<sup>2</sup>)
- percent body weight loss at the end of lead-in (<10% and  $\geq 10\%$ )

The outcome measures for the subgroup analyses will include:

- percent change in body weight from randomization to 72 weeks
- proportion of participants achieving at least 5% body weight reduction from randomization to 72 weeks.

#### **9.5. Interim Analyses**

No interim analyses are planned for this study. If an unplanned interim analysis is deemed necessary for reasons other than a safety concern, the protocol must be amended.

#### **9.6. Data Monitoring Committee (DMC)**

Not applicable.

## **10. Supporting Documentation and Operational Considerations**

### **10.1. Appendix 1: Regulatory, Ethical, and Study Oversight Considerations**

#### **10.1.1. Regulatory and Ethical Considerations**

- This study will be conducted in accordance with the protocol and with the following:
  - Consensus ethical principles derived from international guidelines including the Declaration of Helsinki and Council for International Organizations of Medical Sciences (CIOMS) International Ethical Guidelines
  - Applicable ICH Good Clinical Practice (GCP) Guidelines
  - Applicable laws and regulations
- The protocol, protocol amendments, ICF, IB, and other relevant documents (for example, advertisements) must be submitted to an IRB/IEC by the investigator and reviewed and approved by the IRB/IEC before the study is initiated.
- Any amendments to the protocol will require IRB/IEC approval before implementation of changes made to the study design, except for changes necessary to eliminate an immediate hazard to study participants.
- Protocols and any substantial amendments to the protocol will require health authority approval prior to initiation except for changes necessary to eliminate an immediate hazard to study participants.
- The investigator will be responsible for the following:
  - Providing written summaries of the status of the study to the IRB/IEC annually or more frequently in accordance with the requirements, policies, and procedures established by the IRB/IEC
  - Notifying the IRB/IEC of SAEs or other significant safety findings as required by IRB/IEC procedures
  - Providing oversight of study conduct for participants under their responsibility and adherence to requirements of 21 Code of Federal Regulations (CFR), ICH guidelines, the IRB/IEC, European regulation 536/2014 for clinical studies (if applicable), and all other applicable local regulations
- Investigator sites are compensated for participation in the study as detailed in the clinical trial agreement (CTA).

#### **10.1.2. Informed Consent Process**

- The investigator or his/her representative will explain the nature of the study, including the risks and benefits, to the participant or his/her legally authorized representative and answer all questions regarding the study.

- Study participants must be informed that their participation is voluntary. Study participants or their legally authorized representative will be required to sign a statement of informed consent that meets the requirements of 21 CFR 50, local regulations, ICH guidelines, Health Insurance Portability and Accountability Act (HIPAA) requirements, where applicable, and the IRB/IEC or study center.
- The medical record must include a statement that written informed consent was obtained before the participant was entered in the study and the date the written consent was obtained. The authorized person obtaining the informed consent must also sign the ICF.
- Participants must be re-consented to the most current version of the ICF(s) during their participation in the study.
- A copy of the ICF(s) must be provided to the participant or the participant's legally authorized representative and is kept on file.

#### **10.1.3. Data Protection**

- Participants will be assigned a unique identifier by the sponsor. Any participant records, datasets or tissue samples that are transferred to the sponsor will contain the identifier only; participant names or any information which would make the participant identifiable will not be transferred.
- The participant must be informed that his/her personal study-related data will be used by the sponsor in accordance with local data protection law. The level of disclosure must also be explained to the participant who will be required to give consent for his/her data to be used as described in the informed consent.
- The participant must be informed that his/her medical records may be examined by Clinical Quality Assurance auditors or other authorized personnel appointed by the sponsor, by appropriate IRB/IEC members, and by inspectors from regulatory authorities.
- The sponsor has processes in place to ensure data protection, information security and data integrity. These processes include appropriate contingency plan(s) for appropriate and timely response in the event of a data security breach.

#### **10.1.4. Committees Structure**

Prospective adjudication of major adverse cardiovascular events and pancreatic AEs will be performed for this study. Sections [8.3.2.2](#), and [8.3.2.5](#) outline additional information on pancreatic and cardiovascular adjudication committees.

#### **10.1.5. Dissemination of Clinical Study Data**

Required clinical trial registries (for example, ClinicalTrials.gov) will be updated with the results from registered clinical trials regardless of the research outcome in accordance with local laws and regulations.

All CSRs, amendments and addenda will be submitted to external regulatory authorities, external partners (as applicable) and sites.

The publication policy for Study GPHM is outlined in Section 10.1.9 and further described in the CTA.

#### 10.1.6. Data Quality Assurance

- All participant data relating to the study will be recorded on printed or electronic CRF unless transmitted to the sponsor or designee electronically (for example, laboratory data). The investigator is responsible for verifying that data entries are accurate and correct by physically or electronically signing the CRF.
- The investigator must maintain accurate documentation (source data) that supports the information entered in the CRF.
- The investigator must permit study-related monitoring, audits, IRB/IEC review, and regulatory agency inspections and provide direct access to source data documents.
- Monitoring details describing strategy (for example, risk-based initiatives in operations and quality such as risk management, mitigation strategies, and analytical risk-based monitoring), methods, responsibilities and requirements, including handling of noncompliance issues and monitoring techniques are provided in the Monitoring Plan.
- The sponsor or designee is responsible for the data management of this study including quality checking of the data.
- The sponsor assumes accountability for actions delegated to other individuals (for example, contract research organizations).
- Study monitors will perform ongoing source data verification to confirm that data entered into the CRF by authorized site personnel are accurate, complete, and verifiable from source documents; that the safety and rights of participants are being protected; and that the study is being conducted in accordance with the currently approved protocol and any other study agreements, ICH GCP, and all applicable regulatory requirements.
- Records and documents, including signed ICFs, pertaining to the conduct of this study must be retained by the investigator for the time period outlined in the CTA unless local regulations or institutional policies require a longer retention period. No records may be destroyed during the retention period without the written approval of the sponsor. No records may be transferred to another location or party without written notification to the sponsor.
- In addition, sponsor or its representatives will periodically check a sample of the participant data recorded against source documents at the study site. The study may be audited by sponsor or its representatives, and/or regulatory agencies at any time. Investigators will be given notice before an audit occurs.

## **Data Capture System**

The investigator is responsible for ensuring the accuracy, completeness, legibility, and timeliness of the data reported to the sponsor.

An electronic data capture system (EDC) will be used in this study for the collection of CRF data. The investigator maintains a separate source for the data entered by the investigator or designee into the sponsor-provided EDC system. The investigator is responsible for the identification of any data to be considered source and for the confirmation that data reported are accurate and complete by signing the CRF.

Additionally, clinical outcome assessment (COA) data (participant-focused outcome instrument) and other data (for example, diary), will be collected by the participant, caregiver, or authorized study personnel, via a paper source document and will be transcribed by the authorized study personnel into the EDC system.

Data collected via the sponsor-provided data capture system(s) will be stored at third parties. The investigator will have continuous access to the data during the study and until decommissioning of the data capture system(s). Prior to decommissioning, the investigator will receive an archival copy of pertinent data for retention.

Data managed by a central vendor, such as laboratory test data, will be stored electronically in the central vendor's database. Data will subsequently be transferred from the central vendor to the sponsor data warehouse.

Data from complaint forms submitted to sponsor will be encoded and stored in the global product complaint management system.

### **10.1.7. Source Documents**

- Source documents provide evidence for the existence of the participant and substantiate the integrity of the data collected. Source documents are filed at the investigator's site.
- Data reported on the CRF or entered in the eCRF that are transcribed from source documents must be consistent with the source documents or the discrepancies must be explained. The investigator may need to request previous medical records or transfer records, depending on the study. Also, current medical records must be available.
- Definition of what constitutes source data can be found in study training material.

### **10.1.8. Study and Site Start and Closure**

The study start date is the date on which the clinical study will be open for recruitment of participants.

The sponsor or designee reserves the right to close the study site or terminate the study at any time for any reason at the sole discretion of the sponsor. Study sites will be closed upon study completion. A study site is considered closed when all required documents and study supplies have been collected and a study-site closure visit has been performed.

The investigator may initiate study-site closure at any time, provided there is reasonable cause and sufficient notice is given in advance of the intended termination.

Reasons for the early closure of a study site by the sponsor or investigator may include but are not limited to:

- Failure of the investigator to comply with the protocol, the requirements of the IRB/IEC or local health authorities, the sponsor's procedures, or GCP guidelines
- Inadequate recruitment of participants by the investigator
- Discontinuation of further study intervention development

If the study is prematurely terminated or suspended, the sponsor shall promptly inform the investigators, the IECs/IRBs, the regulatory authorities, and any contract research organization(s) used in the study of the reason for termination or suspension, as specified by the applicable regulatory requirements. The investigator shall promptly inform the participant and assure appropriate participant therapy and/or follow-up.

#### **10.1.9. Publication Policy**

In accordance with the sponsor's publication policy, the results of this study will be submitted for publication by a peer-reviewed journal.

- The sponsor will comply with the requirements for publication of study results.
- Authorship will be determined by mutual agreement and in line with International Committee of Medical Journal Editors authorship requirements.
- The publication policy for Study GPHM is described in the CTA.

**10.2. Appendix 2: Clinical Laboratory Tests**

- The tests detailed below will be performed by a central lab unless designated as local in the SoA and in the table below.
- In circumstances where the sponsor approves local laboratory testing in lieu of central laboratory testing (in the table below), the local laboratory must be qualified in accordance with applicable local regulations.
- Protocol-specific requirements for inclusion or exclusion of participants are detailed in Section 5 of the protocol.
- Additional tests may be performed at any time during the study as determined necessary by the investigator or required by local regulations.
- Pregnancy testing (Refer to Section 5.1 Inclusion Criteria for screening pregnancy criteria).
- Investigators must document their review of each laboratory safety report.
- Laboratory results that could unblind the study will not be reported to investigative sites or other blinded personnel and are denoted in the table below.

**Clinical Laboratory Tests****Hematology<sup>a</sup>**

Hemoglobin  
 Hematocrit  
 Erythrocyte count (RBC)  
 Mean cell volume  
 Mean cell hemoglobin concentration  
 Leukocytes (WBC)  
 Neutrophils, segmented  
 Lymphocytes  
 Monocytes  
 Eosinophils  
 Basophils  
 Platelets

**Urine Chemistries<sup>a</sup>**

Albumin  
 Creatinine

**Cystatin-C<sup>a</sup>****HbA1c<sup>a</sup>****Endocrine<sup>a</sup>**

Calcitonin  
 Thyroid-stimulating hormone (TSH)

**Nonpharmacogenetic Stored Samples<sup>a,b</sup>**

Serum  
 EDTA plasma  
 P800 plasma

**Pharmacogenetics Sample<sup>a,b</sup>**

Whole blood (EDTA)

**Free Fatty Acids<sup>a</sup>****Insulin<sup>a</sup>****C-peptide<sup>a</sup>****Clinical Chemistry<sup>a</sup>**

Bicarbonate  
 Sodium  
 Potassium  
 Total bilirubin  
 Direct bilirubin  
 Alkaline phosphatase  
 Alanine aminotransferase (ALT)  
 Aspartate aminotransferase (AST)  
 Blood urea nitrogen (BUN)  
 Creatinine  
 Uric acid  
 Calcium  
 Glucose  
 Albumin  
 Creatine kinase (CK)

**Hormones (females)**

Pregnancy Test serum <sup>a</sup> and/or urine (local)  
 Follicle-stimulating hormone (FSH)<sup>a</sup>

**Pancreas (exocrine)<sup>a</sup>**

Pancreatic amylase  
 Lipase

**Immunogenicity<sup>a,b</sup>**

Anti-tirzepatide antibodies  
 Anti-tirzepatide antibody neutralization  
 Pharmacokinetic Sample for Immunogenicity

**Lipid Panel<sup>a</sup>**

Triglycerides  
 VLDL-C  
 HDL-C  
 LDL-C<sup>c</sup>  
 Total cholesterol

**Calculations<sup>a</sup>**

eGFR (calculated by CKD-EPI equation)  
 UACR

Abbreviations: CKD-EPI = Chronic Kidney Disease-Epidemiology; eGFR = estimated glomerular filtration rate; EDTA = ethylenediaminetetraacetic acid; HbA1c = hemoglobin A1c; HDL-C = high-density lipoprotein cholesterol; LDL-C = low-density lipoprotein cholesterol; RBC = red blood cells; UACR = urine albumin to creatinine ratio; VLDL-C = very low-density lipoprotein cholesterol; WBC = white blood cells.



- a All tests will be performed by a Lilly-designated central laboratory, unless otherwise noted.
- b Results will not be provided to the investigative sites.
- c This value will be calculated. If triglycerides are >400 mg/dL, the direct LDL will be assayed.

**10.3. Appendix 3: Laboratory Assessments for Hypersensitivity Events**

- Laboratory assessments should be performed if the participant experiences generalized urticaria or if anaphylaxis is suspected.
- Collect sample after the participant has been stabilized, and within 1 to 2 hours of the event; however, samples may be obtained as late as 12 hours after the event as analytes can remain altered for an extended period of time. Record the time at which the sample was collected.
- Obtain a follow-up sample at the next regularly scheduled visit or after 4 weeks, whichever is later.

The table below summarizes the laboratory parameters that will be evaluated. These laboratory tests are bundled in the hypersensitivity laboratory testing kit.

**Clinical Lab Tests for Hypersensitivity Events**

| <b>Hypersensitivity Tests</b>                         | <b>Notes</b>                                                                                                                                                                                                                                                                                                                                                                                                                                                                                                                                                                                                                                                                                                         |
|-------------------------------------------------------|----------------------------------------------------------------------------------------------------------------------------------------------------------------------------------------------------------------------------------------------------------------------------------------------------------------------------------------------------------------------------------------------------------------------------------------------------------------------------------------------------------------------------------------------------------------------------------------------------------------------------------------------------------------------------------------------------------------------|
| Tirzepatide anti-drug antibodies (immunogenicity/ADA) | Selected test may be obtained in the event of anaphylaxis or systemic allergic/hypersensitivity reactions.                                                                                                                                                                                                                                                                                                                                                                                                                                                                                                                                                                                                           |
| Tirzepatide concentrations (PK)                       | Assayed by Lilly-designated laboratory. Results will not be provided to the investigative sites.                                                                                                                                                                                                                                                                                                                                                                                                                                                                                                                                                                                                                     |
| Tryptase                                              | Assayed by Lilly-designated laboratory. Results will not be provided to the investigative sites.<br><b>Note:</b> If a tryptase sample is obtained more than 2 hours after the event (that is, within 2 to 12 hours), or is not obtained because more than 12 hours have lapsed since the event, obtain urine sample for N-methylhistamine testing. Note that for tryptase serum samples obtained within 2 to 12 hours of the event, urine N-methylhistamine testing is performed in addition to tryptase testing. Collect the first void urine sample following the event. Obtain a follow-up urine sample for N-methylhistamine testing at the next regularly scheduled visit or after 4 weeks, whichever is later. |
| N-methylhistamine                                     | Assayed by Lilly-designated laboratory. Results will not be provided to the investigative sites.                                                                                                                                                                                                                                                                                                                                                                                                                                                                                                                                                                                                                     |
| Drug-specific IgE                                     | Will be performed if a validated assay is available.<br>Assayed by Lilly-designated laboratory. Results will not be provided to the investigative sites.                                                                                                                                                                                                                                                                                                                                                                                                                                                                                                                                                             |
| Basophil activation test                              | Will be performed if a validated assay is available.<br>Assayed by Lilly-designated laboratory. Results will not be provided to the investigative sites.<br><b>Note:</b> The basophil activation test is an in vitro cell based assay that only requires a serum sample. It is a surrogate assay for drug specific IgE, but is not specific for IgE.                                                                                                                                                                                                                                                                                                                                                                 |
| Complement (C3, C3a, and C5a)                         | Assayed by Lilly-designated laboratory. Results will not be provided to the investigative sites.                                                                                                                                                                                                                                                                                                                                                                                                                                                                                                                                                                                                                     |
| Cytokine panel (IL-6, IL-1 $\beta$ , IL-10)           | Assayed by Lilly-designated laboratory. Results will not be provided to the investigative sites.                                                                                                                                                                                                                                                                                                                                                                                                                                                                                                                                                                                                                     |

Abbreviations: ADA = anti-drug antibody; IgE = immunoglobulin E; IL = interleukin; PK = pharmacokinetic.

## 10.4. Appendix 4: Adverse Events: Definitions and Procedures for Recording, Evaluating, Follow-up, and Reporting

### 10.4.1. Definition of AE

#### AE Definition

- An AE is any untoward medical occurrence in a participant administered a pharmaceutical product and which does not necessarily have a causal relationship with the study intervention. An AE can therefore be any unfavourable and unintended sign (including an abnormal laboratory finding), symptom, or disease (new or exacerbated) temporally associated with the use of a medicinal (investigational) product, whether or not related to the medicinal (investigational) product.

#### Events Meeting the AE Definition

- Any abnormal laboratory test results (hematology, clinical chemistry, or urinalysis) or other safety assessments (for example, ECG, radiological scans, vital signs measurements), including those that worsen from baseline, considered clinically significant in the medical and scientific judgment of the investigator (that is, not related to progression of underlying disease).
- Exacerbation of a chronic or intermittent pre-existing condition including either an increase in frequency and/or intensity of the condition.
- New conditions detected or diagnosed after intensive lifestyle intervention or study drug intervention administration even though they may have been present before the start of the study.
- Signs, symptoms, or the clinical sequelae of a suspected drug-drug interaction.
- Signs, symptoms, or the clinical sequelae of a suspected overdose of either study drug intervention or a concomitant medication.
- “Lack of efficacy” or “failure of expected pharmacological action” per se will not be reported as an AE or SAE. Such instances will be captured in the efficacy assessments. However, the signs, symptoms, and/or clinical sequelae resulting from lack of efficacy will be reported as an AE or SAE if they fulfill the definition of an AE or SAE.

#### Events NOT Meeting the AE Definition

- Any clinically significant abnormal laboratory findings or other abnormal safety assessments which are associated with the underlying disease, unless judged by the investigator to be more severe than expected for the participant’s condition.
- The disease/disorder being studied or expected progression, signs, or symptoms of the disease/disorder being studied, unless more severe than expected for the participant’s condition.
- Medical or surgical procedure (for example, endoscopy, appendectomy): the condition

that leads to the procedure is the AE.

- Situations in which an untoward medical occurrence did not occur (social and/or convenience admission to a hospital).
- Anticipated day-to-day fluctuations of pre-existing disease(s) or condition(s) present or detected at the start of the study that do not worsen.

#### 10.4.2. Definition of SAE

If an event is not an AE per definition above, then it cannot be an SAE even if serious conditions are met (for example, hospitalization for signs/symptoms of the disease under study, death due to progression of disease).

|                                                                                                                                                                                                                                                                                                                                                                                                                                                                                                                                                                                                                                                                                                                                                                                       |
|---------------------------------------------------------------------------------------------------------------------------------------------------------------------------------------------------------------------------------------------------------------------------------------------------------------------------------------------------------------------------------------------------------------------------------------------------------------------------------------------------------------------------------------------------------------------------------------------------------------------------------------------------------------------------------------------------------------------------------------------------------------------------------------|
| <b>SAE is defined as any untoward medical occurrence that, at any dose:</b>                                                                                                                                                                                                                                                                                                                                                                                                                                                                                                                                                                                                                                                                                                           |
| <b>a. Results in death</b>                                                                                                                                                                                                                                                                                                                                                                                                                                                                                                                                                                                                                                                                                                                                                            |
| <b>b. Is life-threatening</b><br>The term 'life-threatening' in the definition of 'serious' refers to an event in which the participant was at risk of death at the time of the event. It does not refer to an event, which hypothetically might have caused death, if it were more severe.                                                                                                                                                                                                                                                                                                                                                                                                                                                                                           |
| <b>c. Requires inpatient hospitalization or prolongation of existing hospitalization</b> <ul style="list-style-type: none"> <li>• In general, hospitalization signifies that the participant has been admitted to hospital for observation and/or treatment that would not have been appropriate in the physician's office or outpatient setting. Complications that occur during hospitalization are AEs. If a complication prolongs hospitalization or fulfills any other serious criteria, the event is serious. When in doubt as to whether "hospitalization" occurred or was necessary, the AE should be considered serious.</li> <li>• Hospitalization for elective treatment of a pre-existing condition that did not worsen from baseline is not considered an AE.</li> </ul> |
| <b>d. Results in persistent disability/incapacity</b> <ul style="list-style-type: none"> <li>• The term disability means a substantial disruption of a person's ability to conduct normal life functions.</li> <li>• This definition is not intended to include experiences of relatively minor medical significance such as uncomplicated headache, nausea, vomiting, diarrhea, influenza, and accidental trauma (for example, sprained ankle) which may interfere with or prevent everyday life functions but do not constitute a substantial disruption.</li> </ul>                                                                                                                                                                                                                |
| <b>e. Is a congenital anomaly/birth defect</b> <ul style="list-style-type: none"> <li>• Abnormal pregnancy outcomes (for example, spontaneous abortion, fetal death, stillbirth, congenital anomalies, ectopic pregnancy) are considered SAEs.</li> </ul>                                                                                                                                                                                                                                                                                                                                                                                                                                                                                                                             |

**f. Other situations:**

- Medical or scientific judgment should be exercised in deciding whether SAE reporting is appropriate in other situations such as important medical events that may not be immediately life-threatening or result in death or hospitalization but may jeopardize the participant or may require medical or surgical intervention to prevent one of the other outcomes listed in the above definition. These events should usually be considered serious.
- Examples of such events include invasive or malignant cancers, intensive treatment in an emergency room or at home for allergic bronchospasm, blood dyscrasias or convulsions that do not result in hospitalization, or development of drug dependency or drug abuse.

- g.** Resulted in medical or surgical intervention to prevent life-threatening illness or injury or permanent impairment to a body structure or a body function.

**10.4.3. Definition of Product Complaint****Product Complaint**

- A product complaint is any written, electronic, or oral communication that alleges deficiencies related to the identity, quality, durability, reliability, safety, effectiveness or performance of a study intervention. When the ability to use the study intervention safely is impacted, the following are also product complaints:
  - Deficiencies in labeling information, and
  - Use errors for device or drug-device combination products due to ergonomic design elements of the product.
- Product complaints related to study interventions used in clinical trials are collected in order to ensure the safety of participants, monitor quality, and to facilitate process and product improvements.
- Investigators will instruct participants to contact the site as soon as possible if he or she has a product complaint or problem with the study intervention so that the situation can be assessed.
- An event may meet the definition of both a product complaint and an AE/SAE. In such cases, it should be reported as both a product complaint and as an AE/SAE.

**10.4.4. Recording and Follow-Up of AE and/or SAE and Product Complaints****AE, SAE, and Product Complaint Recording**

- When an AE/SAE/product complaint occurs, it is the responsibility of the investigator to review all documentation (for example, hospital progress notes, laboratory reports, and diagnostics reports) related to the event.
- The investigator will then record all relevant AE/SAE/product complaint information in the participant's medical records, in accordance with the investigator's normal clinical practice. Adverse event/SAE information is reported on the appropriate (e)CRF page and



product complaint information is reported on the Product Complaint form.

Note: An event may meet the definition of both a product complaint and an AE/SAE. In such cases, it should be reported as both a product complaint and as an AE/SAE.

- It is **not** acceptable for the investigator to send photocopies of the participant's medical records to the sponsor or designee in lieu of completion of the (e)CRF page for AE/SAE and the Product Complaint form for product complaints.
- There may be instances when copies of medical records for certain cases are requested by sponsor or designee. In this case, all participant identifiers, with the exception of the participant number, will be redacted on the copies of the medical records before submission to the sponsor or designee.
- The investigator will attempt to establish a diagnosis of the event based on signs, symptoms, and/or other clinical information. Whenever possible, the diagnosis (not the individual signs/symptoms) will be documented as the AE/SAE.

#### **Assessment of Intensity**

The investigator will make an assessment of intensity for each AE and SAE reported during the study and assign it to 1 of the following categories:

- **Mild:** A type of AE that is usually transient and may require only minimal treatment or therapeutic intervention. The event does not generally interfere with usual activities of daily living.
- **Moderate:** A type of AE that is usually alleviated with additional specific therapeutic intervention. The event interferes with usual activities of daily living, causing discomfort but poses no significant or permanent risk of harm to the research participant.
- **Severe:** A type of AE that interrupts usual activities of daily living, significantly affects clinical status, or may require intensive therapeutic intervention. An AE that is assessed as severe should not be confused with an SAE. Severe is a category utilized for rating the intensity of an event, and both AEs and SAEs can be assessed as severe.

An event is defined as 'serious' when it meets at least 1 of the predefined outcomes as described in the definition of an SAE, NOT when it is rated as severe.

#### **Assessment of Causality**

- The investigator is obligated to assess the relationship between intensive lifestyle intervention or study drug intervention and each occurrence of each AE/SAE.
- A "reasonable possibility" of a relationship conveys that there are facts, evidence, and/or arguments to suggest a causal relationship, rather than a relationship cannot be ruled out.
- The investigator will use clinical judgment to determine the relationship.
- Alternative causes, such as underlying disease(s), concomitant therapy, and other risk factors, as well as the temporal relationship of the event to intensive lifestyle intervention or study drug intervention administration will be considered and investigated.

- The investigator will also consult the IB and/or Product Information, for marketed products, in his/her assessment.
- For each AE/SAE, the investigator **must** document in the medical notes that he/she has reviewed the AE/SAE and has provided an assessment of causality.
- There may be situations in which an SAE has occurred and the investigator has minimal information to include in the initial report to the sponsor or designee. However, it is very important that the investigator always make an assessment of causality for every event before the initial transmission of the SAE data to the sponsor or designee.
- The investigator may change his/her opinion of causality in light of follow-up information and send an SAE follow-up report with the updated causality assessment.
- The causality assessment is one of the criteria used when determining regulatory reporting requirements.

#### **Follow-up of AEs and SAEs**

- The investigator is obligated to perform or arrange for the conduct of supplemental measurements and/or evaluations as medically indicated or as requested by the sponsor or designee to elucidate the nature and/or causality of the AE or SAE as fully as possible. This may include additional laboratory tests or investigations, histopathological examinations, or consultation with other health care professionals.
- If a participant dies during participation in the study or during a recognized follow-up period, the investigator will provide the sponsor or designee with a copy of any post-mortem findings, including histopathology.

#### **10.4.5. Reporting of SAEs**

##### **SAE Reporting via an Electronic Data Collection Tool**

- The primary mechanism for reporting an SAE will be the electronic data collection tool.
- If the electronic system is unavailable, then the site will use the paper SAE data collection tool (see next section) in order to report the event within 24 hours.
- The site will enter the SAE data into the electronic system as soon as it becomes available.
- After the study is completed at a given site, the electronic data collection tool will be taken off-line to prevent the entry of new data or changes to existing data.
- If a site receives a report of a new SAE from a study participant or receives updated data on a previously reported SAE after the electronic data collection tool has been taken off-line, then the site can report this information on a paper SAE form (see next section) or to the sponsor contact for SAE reporting by telephone.
- Contacts for SAE reporting can be found in study training material.

##### **SAE Reporting via Paper CRF**

- Facsimile transmission of the SAE paper CRF is the preferred method to transmit this



information to the sponsor contacts for SAE reporting.

- Initial notification via telephone does not replace the need for the investigator to complete and sign the SAE CRF pages within the designated reporting time frames.
- Contacts for SAE reporting can be found in study training material.

#### **10.4.6. Regulatory Reporting Requirements**

##### **SAE Regulatory Reporting**

- Prompt notification by the investigator to the sponsor of an SAE is essential so that legal obligations and ethical responsibilities towards the safety of participants and the safety of a study intervention under clinical investigation are met.
- The sponsor has a legal responsibility to notify both the local regulatory authority and other regulatory agencies about the safety of a study intervention under clinical investigation. The sponsor will comply with country-specific regulatory requirements relating to safety reporting to the regulatory authority, IRB/IEC, and investigators.
- An investigator who receives an investigator safety report describing an SAE or other specific safety information (for example, summary or listing of SAEs) from the sponsor will review and then file it along with the IB and will notify the IRB/IEC, if appropriate, according to local requirements.

## 10.5. Appendix 5: Contraceptive Guidance and Collection of Pregnancy Information

### Definitions:

#### Woman of Childbearing Potential (WOCBP)

A woman is considered fertile following menarche and until becoming post-menopausal unless permanently sterile (see below).

If fertility is unclear (for example, amenorrhea in adolescents or athletes) and a menstrual cycle cannot be confirmed before first dose of study intervention, additional evaluation should be considered.

Women in the following categories are not considered women of childbearing potential

Article I. Premenarchal

Article II. Premenopausal female with 1 of the following:

- Documented hysterectomy
- Documented bilateral salpingectomy
- Documented bilateral oophorectomy

For individuals with permanent infertility due to an alternate medical cause other than the above, (for example, Mullerian agenesis, androgen insensitivity), investigator discretion should be applied to determining study entry.

**Note:** Determination can come from the site personnel's review of the participant's medical records, medical examination, or medical history interview.

Article III. Postmenopausal female

- A postmenopausal state is defined as either
  - A woman at least 40 years of age with an intact uterus, not on hormone therapy, who has cessation of menses for at least 1 year without an alternative medical cause, AND an FSH  $\geq$ 40 mIU/mL; or
  - A woman 55 or older not on hormone therapy, who has had at least 12 months of spontaneous amenorrhea; or
  - A woman at least 55 years of age with a diagnosis of menopause prior to starting hormone replacement therapy (HRT).
- Females on HRT and whose menopausal status is in doubt will be required to use one of the nonestrogen hormonal highly effective contraception methods if they wish to continue their HRT during the study. Otherwise, they must discontinue HRT to allow confirmation of postmenopausal status before study enrollment.

### Contraception Guidance:

Contraceptive use by men and women should be consistent with local regulations regarding the methods of contraception for those participating in clinical studies.

Two forms of effective contraception, where at least 1 form is highly effective, will be used. Effective contraception may be used as the second therapy. Barrier protection methods without concomitant use of a spermicide are not a reliable or acceptable method. The use of male and female condoms as a double barrier method is not considered acceptable due to the high failure rate when these methods are combined.

**Highly Effective Methods of Contraception:**

- Combined oral contraceptive pill and mini pill
- NuvaRing®
- Implantable contraceptives
- Injectable contraceptives (such as Depo-Provera®)
- Intrauterine device (such as Mirena® and ParaGard®)
- Contraceptive patch – ONLY women <198 pounds or 90 kg
- Total abstinence (if this is their preferred and usual lifestyle) or in a same-sex relationship with no sexual relationship with males (as part of their preferred and usual lifestyle), and agrees to maintain this status throughout trial follow-up

*Note:* periodic abstinence (for example, calendar, ovulation, symptothermal, and postovulation methods), declaration of abstinence just for the duration of a trial, and withdrawal are not acceptable methods of contraception

- Vasectomy – for men in clinical studies

*Note:* Implantable contraceptives and injectable contraceptives (such as Depo Provera) are only permitted if started more than 18 months prior to screening. Participants should not start these methods of contraception after being enrolled in the study.

**Effective Methods of Contraception (must use combination of 2 methods):**

- Male condom with spermicide
- Female condom with spermicide
- Diaphragm with spermicide
- Cervical sponge
- Cervical cap with spermicide

Men, regardless of their fertility status, with nonpregnant women of childbearing potential partners must agree to either remain abstinent (if this is their preferred and usual lifestyle) or use condoms plus 1 additional highly effective (less than 1% failure rate) method of contraception (such as combination oral contraceptives, implanted contraceptives, or intrauterine device) or effective method of contraception (such as diaphragms with spermicide or cervical sponge) for the duration of the study and for 5 half-lives of study drug plus 90 days, which is approximately 4 months after the last injection. Periodic abstinence (for example, calendar, ovulation,

symptothermal, and postovulation methods), declaration of abstinence just for the duration of a trial, and withdrawal are not acceptable methods of contraception.

Men with pregnant partners should use condoms during intercourse for the duration of the study and until the end of estimated relevant potential exposure in women of childbearing potential.

Men who are abstinent (if this is complete abstinence, as their preferred and usual lifestyle) or in a same-sex relationship (as part of their preferred and usual lifestyle) must agree to either remain abstinent or stay in a same-sex relationship without sexual relationships with females. In these situations, men are not required to use contraception.

Men should refrain from sperm donation for the duration of the study and for 5 half-lives of study drug plus 90 days after the last dose of study drug, corresponding to 4 months after the last injection.

### **Collection of Pregnancy Information**

#### **Male participants with partners who become pregnant**

- The investigator will attempt to collect pregnancy information on any male participant's female partner who becomes pregnant while the male participant is in this study.
- After obtaining the necessary signed informed consent from the pregnant female partner directly, the investigator will record pregnancy information on the appropriate form and submit it to the sponsor within 24 hours of learning of the partner's pregnancy. If pregnancy occurs during study drug intervention period, the female partner will also be followed to determine the outcome of the pregnancy. Information on the status of the mother and child will be forwarded to the sponsor. Generally, the follow-up will be no longer than 6 to 8 weeks following the estimated delivery date. Any termination of the pregnancy will be reported regardless of fetal status (presence or absence of anomalies) or indication for the procedure.

#### **Female Participants who become pregnant**

- The investigator will collect pregnancy information on any female participant who becomes pregnant while participating in this study. The initial information will be recorded on the appropriate form and submitted to the sponsor within 24 hours of learning of a participant's pregnancy.
- The participants who become pregnant during the study drug intervention period will be followed to determine the outcome of the pregnancy. The investigator will collect follow-up information on the participant and the neonate and the information will be forwarded to the sponsor. Generally, follow-up will not be required for longer than 6 to 8 weeks beyond the estimated delivery date. Any termination of pregnancy will be reported, regardless of fetal status (presence or absence of anomalies) or indication for the procedure.

- While pregnancy itself is not considered to be an AE or SAE, any pregnancy complication or elective termination of a pregnancy for medical reasons will be reported as an AE or SAE.
- A spontaneous abortion (occurring at <20 weeks gestational age) or still birth (occurring at >20 weeks gestational age) is always considered to be an SAE and will be reported as such.
- Any post-study pregnancy related SAE considered reasonably related to the study intervention by the investigator will be reported to the sponsor as described in protocol. While the investigator is not obligated to actively seek this information in former study participants, he or she may learn of an SAE through spontaneous reporting.
- Any female participant who becomes pregnant while participating in the study will discontinue intensive lifestyle intervention or study drug intervention. If the participant is discontinued from the study intervention, follow the standard discontinuation process for each study period.

### 10.6. Appendix 6: Liver Safety: Suggested Actions and Follow-up Assessments

- For testing selected, analysis is required to be completed by the Lilly designated central laboratory, except for microbiology.
- Local testing may be performed in addition to central testing when required for immediate participant management.
- Results will be reported if a validated test or calculation is available.

#### Hepatic Evaluation Labs

| Hematology                                 | Clinical Chemistry               |
|--------------------------------------------|----------------------------------|
| Hemoglobin                                 | Total bilirubin                  |
| Hematocrit                                 | Direct bilirubin                 |
| Erythrocytes (RBCs - red blood cells)      | Alkaline phosphatase (ALP)       |
| Leukocytes (WBCs - white blood cells)      | Alanine aminotransferase (ALT)   |
| Differential:                              | Aspartate aminotransferase (AST) |
| Neutrophils, segmented                     | Gamma-glutamyl transferase (GGT) |
| Lymphocytes                                | Creatine kinase (CK)             |
| Monocytes                                  | <b>Other Chemistry</b>           |
| Basophils                                  | Acetaminophen                    |
| Eosinophils                                | Acetaminophen protein adducts    |
| Platelets                                  | Alkaline phosphatase isoenzymes  |
| Cell morphology (RBC and WBC)              | Ceruloplasmin                    |
| <b>Coagulation</b>                         | Copper                           |
| Prothrombin Time, INR (PT-INR)             | Ethyl Alcohol                    |
| <b>Serology</b>                            | Haptoglobin                      |
| Hepatitis A Virus (HAV) testing:           | IgA (Quantitative)               |
| HAV total antibody                         | IgG (Quantitative)               |
| HAV IgM antibody                           | IgM (Quantitative)               |
| Hepatitis B Virus (HBV) Testing:           | Phosphatidylethanol (PEth)       |
| Hepatitis B surface antigen (HBsAg)        | <b>Urine Chemistry</b>           |
| Hepatitis B surface antibody (Anti-HBs)    | Drug Screen                      |
| Hepatitis B core total antibody (Anti-HBc) | Ethyl glucuronide (EtG)          |
| Hepatitis B core IgM antibody              | <b>Other Serology</b>            |
| Hepatitis B core IgG antibody              | Anti-nuclear antibody (ANA)      |

| <b>Hematology</b>                | <b>Clinical Chemistry</b>                       |
|----------------------------------|-------------------------------------------------|
| HBV DNA <sup>a</sup>             | Anti-smooth muscle antibody (ASMA) <sup>b</sup> |
| Hepatitis C Virus (HCV) Testing: | Anti-actin antibody <sup>c</sup>                |
| HCV antibody                     | Epstein-Barr Virus (EBV) Testing:               |
| HCV RNA <sup>a</sup>             | EBV antibody                                    |
| Hepatitis D Virus (HDV) Testing: | EBV DNA <sup>a</sup>                            |
| HDV antibody                     | Cytomegalovirus (CMV) Testing:                  |
| Hepatitis E Virus (HEV) Testing: | CMV antibody                                    |
| HEV IgG antibody                 | CMV DNA <sup>a</sup>                            |
| HEV IgM antibody                 | Herpes Simplex Virus (HSV) Testing:             |
| HEV RNA <sup>a</sup>             | HSV (Type 1 and 2) antibody                     |
| <b>Microbiology<sup>d</sup></b>  | HSV (Type 1 and 2) DNA <sup>a</sup>             |
| Culture:                         | Liver Kidney Microsomal Type 1 (LKM-1) Antibody |
| Blood                            |                                                 |
| Urine                            |                                                 |

Abbreviations: Ig = immunoglobulin; INR = international normalized ratio.

<sup>a</sup> Reflex/confirmation dependent on regulatory requirements, testing availability, or both.

<sup>b</sup> This is not required if anti-actin antibody is tested.

<sup>c</sup> This is not required if anti-smooth muscle antibody is tested.

<sup>d</sup> Assayed by investigator-designated local laboratory ONLY. No central testing available.

## **10.7. Appendix 7: Protocol GPHM Standardized Protocols for the Measurement of Height, Weight, Waist Circumference, Vital Signs and Electrocardiogram**

The following information has been adapted from standardized physical measurement protocols for the World Health Organization's STEPwise approach to Surveillance (STEPS) (WHO 2017)

### **Measuring Height**

- Step 1.** Ask the participant to remove their footwear and any headgear (light headgear worn for religious reasons can remain, but this should be worn by the participant at every clinic visit when their height is measured).
- Step 2.** Ask the participant to stand on the calibrated height measuring board (stadiometer) or against a wall with their feet together and their knees straight with their heels against the backboard, the stadiometer or the wall.
- Step 3.** Ask the participant to look straight ahead without tilting their head up.
- Step 4.** Ask the participant to breathe in and stand tall. Measure and record the participant's height in centimeters (cm) to one decimal place.

### **Measuring Weight**

- Body weight measurements should be done in a consistent manner using a calibrated electronic scale capable of measuring weight in kilograms (kg) to one decimal place.
  - All weights for a given participant should be measured using the same scale, whenever possible, at approximately the same time in the morning after evacuation of bladder contents.
  - Body weight must be measured in fasting state. If the participant is not fasting, the participant should be called in for a new visit within the visit window to have the fasting body weight measured.
- Step 1.** Ask the participant to empty their pockets, remove their footwear, outerwear (coat, jacket, etc.), and any headgear (light headgear worn for religious reasons can remain, but this should be worn by the participant at every clinic visit when weight is measured).
  - Step 2.** Make sure the scale is placed on a firm, flat, even surface (not on carpet, on a sloping surface, or a rough, uneven surface).
  - Step 3.** Ask the participant to step onto the scale with 1 foot on each side of the scale.
  - Step 4.** Ask the participant to stand still with arms by sides and then record weight in kilograms (kg) to the nearest one-tenth kilogram.

### **Measuring Waist Circumference**

- Waist circumference should be measured in the horizontal plane and at the midpoint between the lower margin of the last palpable rib and the top of the iliac crest.
- Measurements should be taken at the end of a normal expiration using a non-stretchable measuring tape. The tape should lie flat against the skin without compressing the soft tissue.



- The waist circumference should be measured twice, rounded to the nearest 0.5 cm. The measuring tape should be removed between the 2 measurements. Both measurements will be recorded in the eCRF. If the difference between the 2 measurements exceeds 1 cm, this set of measurements should be discarded and the 2 measurements repeated.

**Step 1:** Ask the participant to wear little clothing (if available, patient gowns could also be used).

**Step 2:** Ask the participant to stand with their feet close together, arms at their side, body weight evenly distributed.

**Step 3:** Ask the participant to relax and measure the participant's waist circumference.

### **Vital Sign Measurements**

- Vital sign measurements (blood pressure and heart rate, measured by pulse) should be taken before obtaining an ECG tracing and before collection of blood samples for laboratory testing
- The participant should sit quietly for 5 minutes before vital signs measurements are taken
- For each parameter, 2 measurements will be taken using the same arm, preferably the nondominant arm
- The recordings should be taken at least 1 minute apart. Each measurement of sitting pulse and BP needs to be recorded in the eCRF
- Blood pressure must be taken with an automated blood pressure instrument.
- If blood pressure and pulse measurements are taken separately, pulse should be taken prior to blood pressure.

**Note:** In the event pulse measurement cannot be taken via an automated blood pressure instrument, the preferred location for measurement of pulse is the radial artery.

### **Electrocardiogram**

- All digital ECGs will be obtained using centrally provided ECG machines and will be electronically transmitted to a designated central ECG laboratory.
- 12-lead ECGs should be obtained after the subject has rested in a supine position for at least 10 minutes.
- Electrocardiograms should be collected at least 30 minutes prior to collection of blood samples for laboratory testing, including PK samples (collected with immunogenicity testing).

### 10.8. Appendix 8: Suggested Visit Structure

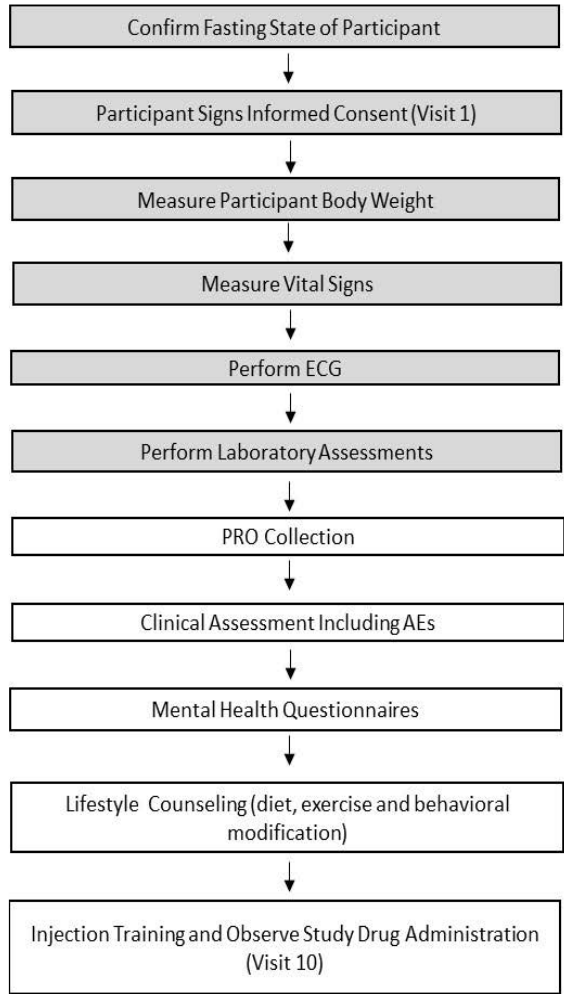

- Activities should be performed in the following order at the specified visits in the SOA
- Shaded areas are activities performed in a fasted state
- Non-shaded areas do not require fasting

Abbreviations: AE=adverse event; ECG=electrocardiogram; PRO=patient reported outcomes; SoA=Schedule of Activities

### 10.9. Appendix 9: Management of Gastrointestinal Symptoms

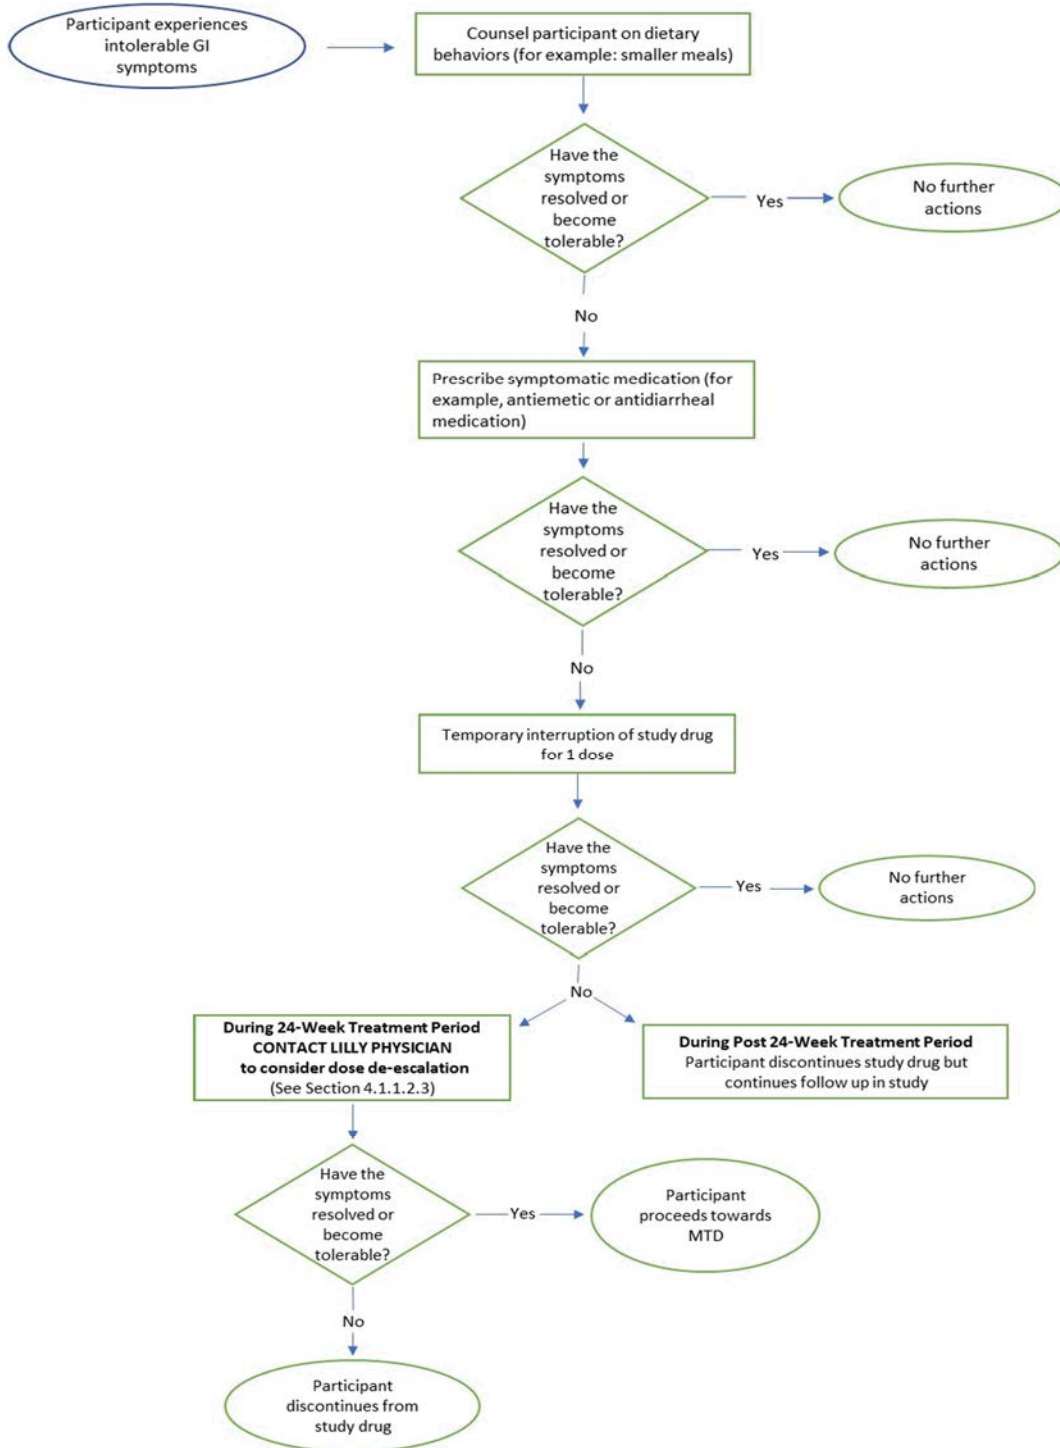

Abbreviation: GI= gastrointestinal

## **10.10. Appendix 10: Provisions for Changes in Study Conduct During Exceptional Circumstances**

### **Implementation of this appendix**

The changes to procedures described in this appendix are temporary measures intended to be used only during specific time periods as directed by the sponsor in partnership with the investigator.

### **Exceptional circumstances**

Exceptional circumstances are rare events that may cause disruptions to the conduct of the study. Examples include pandemics or natural disasters. These disruptions may limit the ability of the investigators, participants, or both to attend on-site visits or to conduct planned study procedures.

### **Implementing changes under exceptional circumstances**

In an exceptional circumstance, after receiving the sponsor's written approval, sites may implement changes if permitted by local regulations.

After approval by local ERBs, regulatory bodies and any other relevant local authorities, implementation of these exceptional circumstance changes will not typically require additional notification to these groups, unless they have specific conditions in which notification is required. To protect the safety of study participants, urgent changes may be implemented before approval but need to be reported as soon as possible. All approvals must be retained in the study records.

If the sponsor grants written approval for changes in study conduct, the sponsor will also provide additional written guidance, if needed.

### **Considerations for making a change**

The prevailing consideration for making a change is ensuring the safety of study participants. Additional important considerations for making a change are compliance with GCP, enabling participants to continue safely in the study and maintaining the integrity of the study.

### **Informed consent**

Additional consent from the participant will be obtained, if required, for:

- participation in remote visits, as defined in Section "Remote visits,"
- dispensation of additional study intervention during an extended treatment period,
- alternate delivery of study intervention and ancillary supplies, and
- provision of their personal or medical information required prior to implementation of these activities.

### **Changes in study conduct during exceptional circumstances**

Changes in study conduct not described in this appendix, or not consistent with applicable local regulations, are not allowed.

The following changes in study conduct will not be considered protocol deviations.

#### **1. Remote visits**

In source documents and the CRF, the study site should capture the visit method, with a specific explanation for the reason of conducting a remote visit instead of an onsite visit and for any data missing because of missed in-person site visits.

**Telemedicine:**

Telephone or technology-assisted virtual visits, or both, are acceptable to complete appropriate assessments. Assessments to be completed in this manner include, but are not limited to, concomitant medications, review of study participant diary (including study drug compliance), review diet and exercise goals, lifestyle counseling, C-SSRS (Since Last Visit Version), Self-Harm Supplement Form, Self-Harm Follow-up Form (if applicable), and PHQ-9.

**Mobile healthcare:**

Healthcare visits may be performed by a mobile healthcare provider at locations other than the study site when participants cannot travel to the site due to an exceptional circumstance if written approval is provided by the sponsor. Procedures performed at such visits include, but are not limited to, weight and waist measurements, physical assessments, vital signs, ECG, PRO questionnaires administration, collection of blood samples and health information.

**Other alternative locations:**

Laboratory draws may be done at an alternate location in exceptional circumstances.

Regardless of the type of remote visits implemented, the protocol requirements regarding the reporting of AEs, SAEs, and product complaints remain unchanged. Furthermore, every effort should be made to enable participants to return to on-site visits as soon as reasonably possible, while ensuring the safety of both the participants and the site staff.

**2. Local laboratory testing option**

Local laboratory testing may be conducted in lieu of central laboratory testing. The local laboratory must be qualified in accordance with applicable local regulations.

**3. Study intervention and ancillary supplies (including participant diaries)**

When a participant is unable to go to the site to receive study supplies during normal on-site visits, the site should work with the sponsor to determine appropriate actions. These actions may include:

- asking the participant to go to the site and receive study supplies from site staff without completion of a full study visit,
- asking the participant's designee to go to the site and receive study supplies on a participant's behalf, and
- arranging delivery of study supplies.

These requirements must be met before action is taken:

- Alternate delivery of study intervention should be performed in a manner that does not compromise treatment blinding and ensures product integrity. The existing protocol requirements for product accountability remain unchanged, including verification of participant's receipt of study supplies.
- When delivering supplies to a location other than the study site (for example, participant's home), the investigator, sponsor, or both should ensure oversight of the shipping process to ensure accountability and product quality (that is, storage conditions maintained and intact packaging upon receipt).
- Instructions may be provided to the participant or designee on the final disposition of any unused or completed study supplies.

#### **4. Screening period guidance**

To ensure safety of study participants, laboratory values and other eligibility assessments taken at or prior to Visit 2 are valid for a maximum of 90 days. The following rules will be applied for active, not yet enrolled participants whose participation in the study must be paused due to exceptional circumstances:

- If paused for less than 90 days from Visit 1 to Visit 2: the participant will proceed to the next study visit per the usual Schedule of Activities, provided that Visit 2 must be conducted within 90 days from Visit 1.
  - The site should conduct the next visit if the participant's eligibility criteria are confirmed, and the site should document the reason for delay in the CRF.
  - Due to the pause in screening, sites should also reconfirm the impacted participant's consent and document this confirmation in the source documentation.
- If paused for more than 90 days from Visit 1 to Visit 2: The participant must be discontinued because of screening interruption due to an exceptional circumstance. This is documented as a screen failure in the CRF. The participant can re consent and be rescreened as a new participant. The screening procedures per the usual SoA should be followed, starting at Visit 1 to ensure participant eligibility by Visit 2.

#### **5. Adjustments to visit windows**

Whenever possible and safe to do so, as determined by the investigator's discretion, participants should complete the usual SoA. To maximize the possibility that these visits can be conducted as on-site visits, the windows for visits may be adjusted, upon further guidance from the sponsor. This minimizes missing data and preserves the intended conduct of the study.

Randomization visit (Visit 10) should be completed as per original schedule whenever possible and safe to do so. However, the visit may be brought forward no sooner than 7 days or extended up to 14 days relative to the target visit date.

Primary endpoint visit (Visit 28 or 99) should be completed as per original schedule whenever possible and safe to do so. However, the visit may be brought forward no sooner than 14 days or extended up to 28 days relative to the target visit date.

For participants whose visits have extended windows, additional study intervention may need to be provided to avoid interruption and maintain overall integrity of the study.

### **Documentation**

Changes to study conduct will be documented:

- Sites will identify and document the details of how participants, visit types, and conducted activities were affected by exceptional circumstances. Dispensing/shipment records of study intervention and relevant communications, including delegation, should be filed with site study records.
- Source documents generated at a location other than the study site should be part of the investigator's source documentation and should be transferred to the site in a secure and timely manner.

## 10.11. Appendix 11: Abbreviations

| Term              | Definition                                                                                                                                                                                                                                                                                                                                                                                                                                                                                          |
|-------------------|-----------------------------------------------------------------------------------------------------------------------------------------------------------------------------------------------------------------------------------------------------------------------------------------------------------------------------------------------------------------------------------------------------------------------------------------------------------------------------------------------------|
| <b>ADA</b>        | antidrug antibody                                                                                                                                                                                                                                                                                                                                                                                                                                                                                   |
| <b>AE</b>         | adverse event: Any untoward medical occurrence in a patient or clinical investigation subject administered a pharmaceutical product that does not necessarily have a causal relationship with this treatment. An adverse event can therefore be any unfavorable and unintended sign (including an abnormal laboratory finding), symptom, or disease temporally associated with the use of a medicinal (investigational) product, whether or not related to the medicinal (investigational) product. |
| <b>AESI</b>       | adverse event of special interest                                                                                                                                                                                                                                                                                                                                                                                                                                                                   |
| <b>ALP</b>        | alkaline phosphatase                                                                                                                                                                                                                                                                                                                                                                                                                                                                                |
| <b>ALT</b>        | alanine aminotransferase                                                                                                                                                                                                                                                                                                                                                                                                                                                                            |
| <b>AMA</b>        | American Medical Association                                                                                                                                                                                                                                                                                                                                                                                                                                                                        |
| <b>ANCOVA</b>     | analysis of covariance                                                                                                                                                                                                                                                                                                                                                                                                                                                                              |
| <b>AST</b>        | aspartate aminotransferase                                                                                                                                                                                                                                                                                                                                                                                                                                                                          |
| <b>baseline</b>   | A fixed point of reference that is used for comparison purposes. In this study baseline may refer to lead-in enrollment visits (Visit 1 and Visit 2) or randomization visit.                                                                                                                                                                                                                                                                                                                        |
| <b>BG</b>         | blood glucose                                                                                                                                                                                                                                                                                                                                                                                                                                                                                       |
| <b>BMI</b>        | body mass index                                                                                                                                                                                                                                                                                                                                                                                                                                                                                     |
| <b>BMR</b>        | basal metabolic rate                                                                                                                                                                                                                                                                                                                                                                                                                                                                                |
| <b>CEC</b>        | clinical endpoint committee                                                                                                                                                                                                                                                                                                                                                                                                                                                                         |
| <b>CFR</b>        | Code of Federal Regulations                                                                                                                                                                                                                                                                                                                                                                                                                                                                         |
| <b>CHF</b>        | congestive heart failure                                                                                                                                                                                                                                                                                                                                                                                                                                                                            |
| <b>CIOMS</b>      | Council for International Organizations of Medical Sciences                                                                                                                                                                                                                                                                                                                                                                                                                                         |
| <b>CK</b>         | creatine kinase                                                                                                                                                                                                                                                                                                                                                                                                                                                                                     |
| <b>CKD-EPI</b>    | Chronic Kidney Disease-Epidemiology                                                                                                                                                                                                                                                                                                                                                                                                                                                                 |
| <b>complaint</b>  | A complaint is any written, electronic, or oral communication that alleges deficiencies related to the identity, quality, purity, durability, reliability, safety or effectiveness, or performance of a drug or drug delivery system.                                                                                                                                                                                                                                                               |
| <b>compliance</b> | Adherence to all study-related, GCP, and applicable regulatory requirements.                                                                                                                                                                                                                                                                                                                                                                                                                        |
| <b>CONSORT</b>    | Consolidated Standards of Reporting Trials                                                                                                                                                                                                                                                                                                                                                                                                                                                          |



|               |                                                                                                                                                                                                                                       |
|---------------|---------------------------------------------------------------------------------------------------------------------------------------------------------------------------------------------------------------------------------------|
| <b>CRP</b>    | clinical research physician: Individual responsible for the medical conduct of the study. Responsibilities of the CRP may be performed by a physician, clinical research scientist, global safety physician or other medical officer. |
| <b>CSR</b>    | clinical study report                                                                                                                                                                                                                 |
| <b>C-SSRS</b> | Columbia-Suicide Severity Rating Scale                                                                                                                                                                                                |
| <b>CT</b>     | computed tomography                                                                                                                                                                                                                   |
| <b>CTA</b>    | Clinical Trial Agreement                                                                                                                                                                                                              |
| <b>DMC</b>    | Data monitoring committee                                                                                                                                                                                                             |
| <b>DNA</b>    | deoxyribonucleic acid                                                                                                                                                                                                                 |
| <b>DPP-4</b>  | dipeptidyl-peptidase-4                                                                                                                                                                                                                |
| <b>EAS</b>    | efficacy analysis set                                                                                                                                                                                                                 |
| <b>ECG</b>    | electrocardiogram                                                                                                                                                                                                                     |
| <b>eCRF</b>   | electronic case report form                                                                                                                                                                                                           |
| <b>ED</b>     | early discontinuation                                                                                                                                                                                                                 |
| <b>EDC</b>    | electronic data capture                                                                                                                                                                                                               |
| <b>eGFR</b>   | estimated glomerular filtration rate                                                                                                                                                                                                  |
| <b>EMA</b>    | European Medicines Agency                                                                                                                                                                                                             |
| <b>enroll</b> | In this study enroll refers to all participants who enter the 12-week lead-in period at Visit 2.                                                                                                                                      |
| <b>enter</b>  | Participants entered into a study are those who sign the informed consent form directly or through their legally acceptable representatives.                                                                                          |
| <b>ERB</b>    | Ethical Review Board                                                                                                                                                                                                                  |
| <b>FAS</b>    | full analysis set                                                                                                                                                                                                                     |
| <b>FDA</b>    | Food and Drug Administration                                                                                                                                                                                                          |
| <b>FSH</b>    | follicle-stimulating hormone                                                                                                                                                                                                          |
| <b>GCP</b>    | Good Clinical Practice                                                                                                                                                                                                                |
| <b>GI</b>     | gastrointestinal                                                                                                                                                                                                                      |
| <b>GIP</b>    | glucose-dependent insulinotropic polypeptide                                                                                                                                                                                          |
| <b>GIPR</b>   | glucose-dependent insulinotropic polypeptide receptor                                                                                                                                                                                 |

|                         |                                                                                                                                                                                                                                                                                                                                                                                                                             |
|-------------------------|-----------------------------------------------------------------------------------------------------------------------------------------------------------------------------------------------------------------------------------------------------------------------------------------------------------------------------------------------------------------------------------------------------------------------------|
| <b>GLP-1</b>            | glucagon-like peptide-1                                                                                                                                                                                                                                                                                                                                                                                                     |
| <b>GLP-1R</b>           | glucagon-like peptide-1 receptor                                                                                                                                                                                                                                                                                                                                                                                            |
| <b>HbA1c</b>            | hemoglobin A1c                                                                                                                                                                                                                                                                                                                                                                                                              |
| <b>HDL</b>              | high-density lipoprotein                                                                                                                                                                                                                                                                                                                                                                                                    |
| <b>HIPAA</b>            | Health Insurance Portability and Accountability Act                                                                                                                                                                                                                                                                                                                                                                         |
| <b>HRQoL</b>            | health-related quality of life                                                                                                                                                                                                                                                                                                                                                                                              |
| <b>IB</b>               | Investigator's Brochure                                                                                                                                                                                                                                                                                                                                                                                                     |
| <b>ICF</b>              | informed consent form                                                                                                                                                                                                                                                                                                                                                                                                       |
| <b>ICH</b>              | The International Council for Harmonization of Technical Requirements for Pharmaceuticals for Human Use                                                                                                                                                                                                                                                                                                                     |
| <b>informed consent</b> | A process by which a patient voluntarily confirms his or her willingness to participate in a particular study, after having been informed of all aspects of the study that are relevant to the patient's decision to participate. Informed consent is documented by means of a written, signed and dated informed consent form.                                                                                             |
| <b>INR</b>              | international normalization ratio                                                                                                                                                                                                                                                                                                                                                                                           |
| <b>interim analysis</b> | An interim analysis is an analysis of clinical study data, separated into treatment groups, that is conducted before the final reporting database is created/locked.                                                                                                                                                                                                                                                        |
| <b>IP</b>               | Investigational product; a pharmaceutical form of an active ingredient or placebo being tested or used as a reference in a clinical trial, including products already on the market when used or assembled (formulated or packaged) in a way different from the authorized form, or marketed products used for an unauthorized indication, or marketed products used to gain further information about the authorized form. |
| <b>IRB/IEC</b>          | Institutional Review Boards /Independent Ethics Committees                                                                                                                                                                                                                                                                                                                                                                  |
| <b>IWQOL-Lite-CT</b>    | Impact of Weight on Quality of Life-Lite-Clinical Trials Version                                                                                                                                                                                                                                                                                                                                                            |
| <b>IWRS</b>             | interactive web-response system                                                                                                                                                                                                                                                                                                                                                                                             |
| <b>LCD</b>              | low calorie diet                                                                                                                                                                                                                                                                                                                                                                                                            |
| <b>LDL</b>              | low-density lipoprotein                                                                                                                                                                                                                                                                                                                                                                                                     |
| <b>MAD</b>              | multiple ascending dose                                                                                                                                                                                                                                                                                                                                                                                                     |
| <b>MDD</b>              | Major Depressive Disorder                                                                                                                                                                                                                                                                                                                                                                                                   |
| <b>MedDRA</b>           | Medical Dictionary for Regulatory Activities                                                                                                                                                                                                                                                                                                                                                                                |
| <b>MEN</b>              | multiple endocrine neoplasia                                                                                                                                                                                                                                                                                                                                                                                                |
| <b>MHP</b>              | mental health professional                                                                                                                                                                                                                                                                                                                                                                                                  |

|                   |                                                                                                                                                            |
|-------------------|------------------------------------------------------------------------------------------------------------------------------------------------------------|
| <b>mITT</b>       | modified intention-to-treat                                                                                                                                |
| <b>MMRM</b>       | mixed model for repeated measures                                                                                                                          |
| <b>MRI</b>        | magnetic resonance imaging                                                                                                                                 |
| <b>MTC</b>        | medullary thyroid carcinoma                                                                                                                                |
| <b>MTD</b>        | maximum tolerated dose                                                                                                                                     |
| <b>NAFLD</b>      | nonalcoholic fatty liver disease                                                                                                                           |
| <b>NYHA</b>       | New York Heart Association                                                                                                                                 |
| <b>p-amylase</b>  | pancreatic amylase                                                                                                                                         |
| <b>PAL</b>        | physical activity level                                                                                                                                    |
| <b>PCOS</b>       | polycystic ovarian syndrome                                                                                                                                |
| <b>PGIs</b>       | Patient Global Impression of status                                                                                                                        |
| <b>PHQ-9</b>      | Patient Health Questionnaire-9                                                                                                                             |
| <b>PK/PD</b>      | pharmacokinetics/pharmacodynamics                                                                                                                          |
| <b>PROs</b>       | patient-reported outcomes                                                                                                                                  |
| <b>QW</b>         | once weekly                                                                                                                                                |
| <b>randomized</b> | All participants who are indiscriminately assigned a study drug.                                                                                           |
| <b>SAD</b>        | single ascending dose                                                                                                                                      |
| <b>SAE</b>        | serious adverse event                                                                                                                                      |
| <b>SAP</b>        | statistical analysis plan                                                                                                                                  |
| <b>SC</b>         | subcutaneous                                                                                                                                               |
| <b>screen</b>     | The act of determining if an individual meets minimum requirements to become part of a pool of potential candidates for participation in a clinical study. |
| <b>SD</b>         | standard deviation                                                                                                                                         |
| <b>SF-36v2</b>    | Short Form-36 Health Survey (SF-36), version 2 acute form                                                                                                  |
| <b>SoA</b>        | Schedule of Activities                                                                                                                                     |
| <b>SS</b>         | Safety analysis set                                                                                                                                        |
| <b>T1DM</b>       | Type 1 diabetes mellitus                                                                                                                                   |
| <b>T2DM</b>       | Type 2 diabetes mellitus                                                                                                                                   |

|                |                                                                                                                                                                                                                                                                                   |
|----------------|-----------------------------------------------------------------------------------------------------------------------------------------------------------------------------------------------------------------------------------------------------------------------------------|
| <b>TBL</b>     | total bilirubin level                                                                                                                                                                                                                                                             |
| <b>TE</b>      | Treatment-emergent                                                                                                                                                                                                                                                                |
| <b>TE ADA+</b> | treatment-emergent antidrug antibody positive                                                                                                                                                                                                                                     |
| <b>TEAE</b>    | treatment-emergent adverse event: An untoward medical occurrence that emerges during a defined treatment period, having been absent pretreatment, or worsens relative to the pretreatment state, and does not necessarily have to have a causal relationship with this treatment. |
| <b>TEE</b>     | total energy expenditure                                                                                                                                                                                                                                                          |
| <b>THC</b>     | tetrahydrocannabinol                                                                                                                                                                                                                                                              |
| <b>TSH</b>     | thyroid-stimulating hormone                                                                                                                                                                                                                                                       |
| <b>ULN</b>     | upper limit of normal                                                                                                                                                                                                                                                             |
| <b>VLCD</b>    | very low calorie diet                                                                                                                                                                                                                                                             |
| <b>WHO</b>     | World Health Organization                                                                                                                                                                                                                                                         |

---

## 11. References

- [ADA]. Glycemic targets: standards of medical care in diabetes- 2020. *Diabetes Care* 2020(suppl 1):S66–S76. <https://doi.org/10.2337/dc20-S006>
- [AMA]. American Medical Association House of Delegates resolution: 420 (A-13): recognition of obesity as a disease. May 2013. Accessed May 21, 2020. <https://media.npr.org/documents/2013/jun/ama-resolution-obesity.pdf>
- Aroda VR, Ratner R. The safety and tolerability of GLP-1 receptor agonists in the treatment of type 2 diabetes: a review. *Diabetes Metab Res Rev*. 2011;27(6):528-542. <https://doi.org/10.1002/dmrr.1202>
- Baggio LL, Drucker DJ. Biology of incretins: GLP-1 and GIP. *Gastroenterology*. 2007;132(6):2131-2157. <https://doi.org/10.1053/j.gastro.2007.03.054>
- Banks PA, Freeman ML. Practice Parameters Committee of the American College of Gastroenterology. Practice guidelines in acute pancreatitis. *Am J Gastroenterol*. 2006;101(10):2379-2400. <https://doi.org/10.1111/j.1572-0241.2006.00856.x>
- Coskun T, Sloop KW, Loghin C, et al. LY3298176, a novel dual GIP and GLP-1 receptor agonist for the treatment of type 2 diabetes mellitus: from discovery to clinical proof of concept. *Mol Metab*. 2018;18:3-14. <https://doi.org/10.1016/j.molmet.2018.09.009>
- Council on Science and Public Health. Report of the Council on Science and Public Health: is obesity a disease? (Resolution 115-A-12): Report number: 3-A-13. 2013. Accessed May 21, 2020. <https://www.ama-assn.org/sites/ama-assn.org/files/corp/media-browser/public/about-ama/councils/Council%20Reports/council-on-science-public-health/a13csaph3.pdf>.
- Danne T, Philotheou A, Goldman D, et al. A randomized trial comparing the rate of hypoglycemia – assessed using continuous glucose monitoring – in 125 preschool children with type 1 diabetes treated with insulin glargine or NPH insulin (the PRESCHOOL study). *Pediatr Diabetes*. 2013;14(8):593-601. <https://doi/10.1111/pedi.12051>
- Dolan P. Modeling valuations for EuroQol health states. *Medical Care*. 1997;35(11):1095-1108. <https://doi/10.1097/00005650-199711000-00002>
- Doucet É, McInis K, Mahmoodianfard S. Compensation in response to energy deficits induced by exercise or diet. *Obesity Rev*. 2018;19(suppl1):36-46. <https://doi.org/10.1111/obr.12783>
- [EMA]. Guideline on clinical evaluation of medicinal products used in weight management. EMA/CHMP/311805/2014. Published June 23, 2016. Accessed May 22, 2020 [https://www.ema.europa.eu/en/documents/scientific-guideline/guideline-clinical-evaluation-medicinal-products-used-weight-management-revision-1\\_en.pdf](https://www.ema.europa.eu/en/documents/scientific-guideline/guideline-clinical-evaluation-medicinal-products-used-weight-management-revision-1_en.pdf). Published 23 June 2016.
- EuroQol Research Foundation. EQ-5D-5L User Guide, Version 3.0. Updated September 2019. Accessed March 13, 2020. <https://euroqol.org/publications/user-guides>.
- [FAO/WHO/UNU] Food and Agriculture Organization of the United Nations/World Health Organization/United Nations University. Human energy requirements: report of a joint

- FAO/WHO/UNU expert consultation. Published October 2004 Accessed May 21, 2020. <http://www.fao.org/3/y5686e/y5686e00.htm>.
- [FDA]. Guidance for industry: developing products for weight management. Published February 2007. Accessed May 22, 2020. <https://www.fda.gov/media/71252/download>.
- [FDA]. FDA requests the withdrawal of the weight-loss drug Belviq, Belviq XR (lorcaserin) from the market: potential risk of cancer outweighs the benefits. Published 14 January 2020. Accessed June 5, 2020. <https://www.fda.gov/media/135189/download>.
- Frias JP, Nauck MA, Van J, et al. Efficacy and safety of LY3298176, a novel dual GIP and GLP-1 receptor agonist, in patients with type 2 diabetes: a randomized, placebo-controlled and active comparator-controlled phase 2 trial. *Lancet*. 2018;392(10160):2180-2193. [https://doi.org/10.1016/S0140-6736\(18\)32260-8](https://doi.org/10.1016/S0140-6736(18)32260-8)
- Garvey WT, Mechanick JI, Brett EM, et al. American Association of Clinical Endocrinologists and American College of Endocrinology comprehensive clinical practice guidelines for medical care of patients with obesity. *Endocr Pract*. 2016;22(suppl 3):1-203. <https://doi.org/10.4158/EP161365.GL>
- Gerstein HC, Colhoun HM, Dagenais GR, et al. Dulaglutide and cardiovascular outcomes in type 2 diabetes (REWIND): a double-blind, randomized placebo-controlled trial. *Lancet*. 2019;394(10193):121-130. [https://doi.org/10.1016/S0140-6736\(19\)31149-3](https://doi.org/10.1016/S0140-6736(19)31149-3)
- Goldstein DJ. Beneficial health effects of modest weight loss. *Int J Obes Relat Metab Disord*. 1992;16(6): 397-41
- Heymsfield SB, van Mierlo CA, van der Knaap HC, Heo M, Frier HI. Weight management using a meal replacement strategy: meta and pooling analysis from six studies. *Int J Obes Relat Metab Disord*. 2003 May;27(5):537-49. <https://doi:10.1038/sj.ijo.0802258>. PMID: 12704397.
- Jensen MD, Ryan DH, Donato KA, et al. Executive summary: guidelines (2013) for the management of overweight and obesity in adults: a report of the American College of Cardiology/American Heart Association Task Force on Practice Guidelines and the Obesity Society published by the Obesity Society and American College of Cardiology/American Heart Association Task Force on Practice Guidelines. based on a systematic review from the Obesity Expert Panel, 2013. *Obesity*. 2014;22(suppl 2):S5-S39. <https://doi.org/10.1002/oby.20821>
- Knowler WC, Barrett-Connor E, Fowler SE, et al. Reduction in the incidence of type 2 diabetes with lifestyle intervention or metformin. *N Engl J Med*. 2002;346(6):393-403. <https://doi.org/10.1056/NEJMoa012512>
- Koizumi M, Takada T, Kawarada Y, et al. JPN Guidelines for the management of acute pancreatitis: diagnostic criteria for acute pancreatitis. *J Hepatobiliary Pancreat Surg*. 2006;13(1):25-32. <https://doi.org/10.1007/s00534-005-1048-2>
- Kolotkin RL, Andersen JR. A systematic review of reviews: exploring the relationship between obesity, weight loss and health-related quality of life. *Clin Obes*. 2017;7(5):273-289. <https://doi.org/10.1111/cob.12203>
- Kolotkin RL, Ervin CM, Meincke HH, et al. Development of a clinical trials version of the Impact of Weight on Quality of Life-Lite questionnaire (IWQoL-Lite Clinical Trials Version):

- results from two qualitative studies. *Clin Obes*. 2017;7(5):290-299.  
<https://doi.org/10.1111/cob.12197>
- Kolotkin RL, Williams VSL, Ervin CM, et al. Validation of a new measure of quality of life in obesity trials: Impact of Weight on Quality of Life – Lite Clinical Trials Version. *Clin Obes*. 2019;9(3):e12310. <https://doi.org/10.1111/cob.12310>
- Lauby-Secretan, B, Scoccianti C, Loomis D, et al.; International Agency for Research on Cancer Handbook Working Group. Body fatness and cancer-viewpoint of the IARC Working Group. *N Engl J Med*. 2016;375(8):794-798. <https://doi.org/10.1056/NEJMs1606602>
- Leibel RL, Rosenbaum M, Hirsch J. Changes in energy expenditure resulting from altered body weight. *N Engl J Med*. 1995;332(10):621-628.  
<https://doi.org/10.1056/NEJM199503093321001>
- Luppino FS, de Wit LM, Bouvy PF, et al. Overweight, obesity, and depression: a systematic review and meta-analysis of longitudinal studies. *Arch Gen Psychiatry*. 2010;67(3):220-229.  
<https://doi.org/10.1001/archgenpsychiatry.2010.2>
- Marso SP, Bain SC, Consoli A, et al. Semaglutide and cardiovascular outcomes in patients with type 2 diabetes. *N Engl J Med*. 2016a;375(19):1834-1844.  
<https://doi.org/10.1056/NEJMoa1607141>
- Marso SP, Daniels GH, Brown-Frandsen K, et al. Liraglutide and cardiovascular outcomes in type 2 diabetes. *N Engl J Med*. 2016b;375(4):311-322.  
<https://doi.org/10.1056/NEJMoa1603827>
- Maruish ME, ed. *User's Manual for the SF-36v2 Health Survey*. 3rd ed. Lincoln, RI: Quality Metric Incorporated; 2011.
- Mertens IL, Van Gaal LF. Overweight, obesity, and blood pressure: the effects of modest weight reduction. *Obes Res*. 2000;8(3):270-278. <https://doi.org/10.1038/oby.2000.32>
- Müller TD, Clemmensen C, Finan B, et al. Anti-obesity therapy: from rainbow pills to polyagonists. *Pharmacol Rev*. 2018;70(4):712-746. <https://doi.org/10.1124/pr.117.014803>
- Nauck MA, Meier JJ, Schmidt WE. Incretin-based glucose-lowering medications and the risk of acute pancreatitis and/or pancreatic cancer: reassuring data from cardio-vascular outcome trials. *Diabetes Obes Metab*. 2017;19(9):1327-1328. <https://doi.org/10.1111/dom.12981>
- [NHLBI]. Managing overweight and obesity in adults: systematic evidence review from the Obesity Expert Panel, 2013. Available at:  
<https://www.nhlbi.nih.gov/sites/default/files/media/docs/obesity-evidence-review.pdf>.  
Published 2013. Accessed June 12, 2020.
- [NHLBI]. The practical guide identification, evaluation, and treatment of overweight and obesity in adults. Available at: [https://www.nhlbi.nih.gov/files/docs/guidelines/prctgd\\_c.pdf](https://www.nhlbi.nih.gov/files/docs/guidelines/prctgd_c.pdf).  
Published October 2000. Accessed June 12, 2020.
- Ryan DH, Yockey SR. Weight loss and improvement in comorbidity: differences at 5%, 10%, 15%, and over. *Curr Obes Rep*. 2017;6(2):187-194. <https://doi.org/10.1007/s13679-017-0262-y>
- SAXENDA [summary of product characteristics]. Bagsværd, Denmark: Novo Nordisk, 2015.

- SAXENDA [package insert]. Bagsværd, Denmark: Novo Nordisk; 2014.
- Skow MA, Bergmann NC, Knop FK. Diabetes and obesity treatment based on dual incretin receptor activation: “twincretins”. *Diabetes Obe Metab*. 2016;18(9):847-854. <https://doi.org/10.1111/dom.12685>
- Srivastava G, Apovian CM. Current pharmacotherapy for obesity. *Nat Rev Endocrinol*. 2018;14(1):12-24. <https://doi.org/10.1038/nrendo.2017.122>
- Steinberg WM, Buse JB, Ghorbani MLM, et al. LEADER Steering Committee; LEADER Trial Investigators. Amylase, lipase, and acute pancreatitis in people with type 2 diabetes treated with liraglutide: results from the LEADER randomized trial. *Diabetes Care*. 2017a;40(7):966-972. <https://doi.org/10.2337/dc16-2747>
- Steinberg WM, Rosenstock J, Wadden TA, et al. Impact of liraglutide on amylase, lipase, and acute pancreatitis in participants with overweight/obesity and normoglycemia, prediabetes, or type 2 diabetes: secondary analyses of pooled data from the SCALE clinical development program. *Diabetes Care*. 2017b;40(7):839-848. <https://doi.org/10.2337/dc16-2684>
- Sumithran P, Prendergast LA, Delbridge E, et al. Long-term persistence of hormonal adaptations to weight loss. *N Engl J Med*. 2011;365(17):1597-1604. <https://doi.org/10.1056/NEJMoa1105816>
- Tomlinson B, Hu M, Zhang Y, et al. An overview of new GLP-1 receptor agonists for type 2 diabetes. *Expert Opin Investig Drugs*. 2016;25(2):145-158. <https://doi.org/10.1517/13543784.2016.1123249>
- van Bloemendaal L, Ten Kulve JS, la Fleur SE, et al. Effects of glucagon-like peptide 1 on appetite and body weight: focus on the CNS. *J Endocrinol*. 2014;221(1):T1-T16. <https://doi.org/10.1530/JOE-13-0414>
- Wadden TA, Foster GD, Letizia KA. One-year behavioral treatment of obesity: comparison of moderate and severe caloric restriction and the effects of weight maintenance therapy. *J Consult Clin Psychol*. 1994;62(1):165-171. <https://doi.org/10.1037//0022-006x.62.1.165>
- Weinberg ME, Bacchetti P, Rushakoff RJ. Frequently repeated glucose measurements overestimate the incidence of inpatient hypoglycemia and severe hyperglycemia. *J Diabetes Sci Technol*. 2010;4(3):577-582. <https://doi.org/10.1177/193229681000400311>
- [WHO]. WHO STEPS surveillance manual: the WHO STEPwise approach to noncommunicable disease risk factor surveillance. Updated 26 January 2017. Accessed May 4, 2020. [https://www.who.int/ncds/surveillance/steps/STEPS\\_Manual.pdf](https://www.who.int/ncds/surveillance/steps/STEPS_Manual.pdf).
- Wing RR, Lang W, Wadden TA, et al. ; Look AHEAD Research Group. Benefits of modest weight loss in improving cardiovascular risk factors in overweight and obese individuals with type 2 diabetes. *Diabetes Care*. 2011; 34(7):1481-1486. <https://doi.org/10.2337/dc10-2415>



Leo Document ID = a1f37e94-98cb-4d3e-b822-c86293aa4b40

Approver: PPD

Approval Date & Time: 19-Nov-2020 21:02:18 GMT

Signature meaning: Approved

Approver: PPD

Approval Date & Time: 19-Nov-2020 21:05:48 GMT

Signature meaning: Approved

## Title Page

**Protocol Title:** Efficacy and Safety of Tirzepatide Once Weekly versus Placebo After an Intensive Lifestyle Program in Participants without Type 2 Diabetes who have Obesity or are Overweight with Weight-Related Comorbidities: A Randomized, Double-Blind, Placebo-Controlled Trial (SURMOUNT-3)

**Protocol Number:** I8F-MC-GPHM

**Compound Number:** LY3298176

**Short Title:** Effect of Tirzepatide versus Placebo after Intensive Lifestyle Program (SURMOUNT-3)

**Acronym:** SURMOUNT-3

**Sponsor Name:** Eli Lilly and Company

**Legal Registered Address:** Indianapolis, Indiana USA 46285

**Regulatory Agency Identifier Number(s)**

IND PPD

## Confidential Information

The information contained in this document is confidential and the information contained within it may not be reproduced or otherwise disseminated without the approval of Eli Lilly and Company or its subsidiaries

**Note to Regulatory Authorities:** This document may contain protected personal data and/or commercially confidential information exempt from public disclosure. Eli Lilly and Company requests consultation regarding release/redaction prior to any public release. In the United States, this document is subject to Freedom of Information Act (FOIA) Exemption 4 and may not be reproduced or otherwise disseminated without the written approval of Eli Lilly and Company or its subsidiaries.

**Document ID:** VV-CLIN-076448

**Table of Contents**

**Title Page .....1**

**Table of Contents .....2**

**List of Abbreviations .....6**

**Version History .....9**

**1. Introduction.....10**

1.1. Objectives, Endpoints, and Estimands.....11

1.1.1. Objectives and Endpoints .....11

1.1.2. Estimands.....13

1.2. Study Design.....16

**2. Statistical Hypotheses .....18**

2.1. Multiplicity Adjustment.....18

**3. Analysis Sets .....20**

**4. Statistical Analyses .....21**

4.1. General Considerations.....21

4.2. Participant Dispositions.....22

4.3. Primary Endpoints Analysis .....23

4.3.1. Definition of Endpoint .....23

4.3.2. Main Analytical Approach.....23

4.4. Secondary Endpoint(s) Analysis.....26

4.4.1. Key Secondary Analyses Subject to Type 1 Error Rate Control .....26

4.4.2. Supportive Secondary Endpoints.....27

4.5. Exploratory Endpoints Analysis .....30

4.6. Safety Analyses.....32

4.6.1. Extent of Exposure.....33

4.6.2. Adverse Events .....34

4.6.3. Additional Safety Assessments.....35

4.6.4. Patient Narratives.....38

4.6.5. Special Safety Topics.....38

4.7. Other Analyses.....54

4.7.1. Health Outcomes.....54

4.7.2. Subgroup Analyses .....56

4.8. Interim Analyses .....58

4.9. Changes to Protocol-Planned Analyses .....58

**5. Sample Size Determination .....59**

**6. Supporting Documentation .....60**

6.1. Appendix 1: Demographic and Baseline Characteristics .....60

6.1.1. Patient Characteristics.....60

6.1.2. Historical Illnesses and Preexisting Conditions.....60

6.1.3. Concomitant Therapy.....60

6.2. Appendix 2: Treatment Compliance.....61

6.3. Appendix 3: Important Protocol Deviations .....61

- 6.4. Appendix 4: Analyses for the Intensive Lifestyle Modification
  - Lead-in Period.....61
  - 6.4.1. General Consideration .....61
  - 6.4.2. Patient Characteristics.....62
  - 6.4.3. Disposition.....62
  - 6.4.4. Medical History, Preexisting Conditions, and Concomitant Medications.....62
  - 6.4.5. Adverse Events .....62
  - 6.4.6. Additional Safety Assessments.....63
  - 6.4.7. Important Protocol Deviations.....63
- 6.5. Appendix 5: Clinical Trial Registry Analyses.....63
- 6.6. Appendix 6: Exceptional Circumstances Impact.....63
  - 6.6.1. General Considerations.....64
  - 6.6.2. Exposure .....64
  - 6.6.3. Protocol Deviations.....64
  - 6.6.4. Patient Disposition.....64
  - 6.6.5. Adverse Events .....64
  - 6.6.6. Major Depressive Disorder/Suicidal Ideation.....64
  - 6.6.7. Local Laboratory Measurements .....65
  - 6.6.8. Missing Data Due to Exceptional Circumstances.....65
- 6.7. Appendix 7: Searching Criteria for Special Safety Topics.....65
- 7. **References.....67**

## Table of Contents

| <b>Table</b>     |                                                                                                     | <b>Page</b> |
|------------------|-----------------------------------------------------------------------------------------------------|-------------|
| Table GPHM.1.1.  | Objectives and Endpoints .....                                                                      | 11          |
| Table GPHM.1.2.  | Attribute Description of Estimands for Secondary Endpoints.....                                     | 15          |
| Table GPHM.3.1.  | Description of Analysis Datasets .....                                                              | 20          |
| Table GPHM.4.1.  | Baseline and Postbaseline Definitions for Safety Groups .....                                       | 22          |
| Table GPHM.4.2.  | Secondary Measures Controlled for Type 1 Error .....                                                | 26          |
| Table GPHM.4.3.  | Secondary Measures Not Controlled for Type 1 Error .....                                            | 27          |
| Table GPHM.4.4.  | Exploratory Efficacy Analysis .....                                                                 | 30          |
| Table GPHM.4.5.  | Categorical Criteria for Abnormal Treatment-Emergent Blood<br>Pressure and Pulse Measurements ..... | 36          |
| Table GPHM.4.6.  | Selected Categorical Limits for ECG Data.....                                                       | 37          |
| Table GPHM.4.7.  | Sample Anti-Drug Antibodies (ADA) Assay Results .....                                               | 43          |
| Table GPHM.4.8.  | Sample Clinical Anti-Drug Antibodies Interpretation Results .....                                   | 43          |
| Table GPHM.4.9.  | <i>In Silico</i> Classification for Cross-Reactive NAb .....                                        | 44          |
| Table GPHM.4.10. | Adverse Events for Analysis with Immunogenicity Results .....                                       | 47          |
| Table GPHM.6.1.  | Baseline and Postbaseline Definitions in Lead-in Period .....                                       | 61          |

**Table of Contents**

| <b>Figure</b>    |                                                                                      | <b>Page</b> |
|------------------|--------------------------------------------------------------------------------------|-------------|
| Figure GPHM.1.1. | Illustration of study design for Clinical Protocol I8F-MC-GPHM.....                  | 16          |
| Figure GPHM.2.1. | Type 1 error control strategy for primary and key secondary efficacy endpoints. .... | 19          |
| Figure GPHM.4.1. | Flowchart of immunogenicity multitiered testing approach. ....                       | 42          |

## List of Abbreviations

---

| Term          | Definition                                           |
|---------------|------------------------------------------------------|
| <b>ADA</b>    | anti-drug antibody                                   |
| <b>AE</b>     | adverse event                                        |
| <b>AESI</b>   | adverse event(s) of special interest                 |
| <b>ALT</b>    | alanine aminotransferase                             |
| <b>ANCOVA</b> | analysis of covariance                               |
| <b>BG</b>     | blood glucose                                        |
| <b>BMI</b>    | body mass index                                      |
| <b>BP</b>     | Bodily Pain                                          |
| <b>CEC</b>    | Clinical Evaluation Committee                        |
| <b>CI</b>     | confidence interval                                  |
| <b>CRF</b>    | case report form                                     |
| <b>CSR</b>    | clinical study report                                |
| <b>C-SSRS</b> | Columbia-Suicide Severity Rating Scale               |
| <b>CTR</b>    | Clinical Trial Registry                              |
| <b>DBP</b>    | diastolic blood pressure                             |
| <b>EAS</b>    | Efficacy Analysis Set                                |
| <b>eCRF</b>   | electronic case report form                          |
| <b>ED</b>     | early discontinuation                                |
| <b>eGFR</b>   | estimated glomerular filtration rate                 |
| <b>FAS</b>    | Full Analysis Set                                    |
| <b>GI</b>     | gastrointestinal                                     |
| <b>GIP</b>    | glucose-dependent insulintropic polypeptide          |
| <b>GIPR</b>   | glucose-dependent insulintropic polypeptide receptor |
| <b>GLP-1</b>  | glucagon-like peptide-1                              |
| <b>GLP-1R</b> | glucagon-like peptide-1 receptor                     |

---

---

|                      |                                                                  |
|----------------------|------------------------------------------------------------------|
| <b>H</b>             | Hypothesis                                                       |
| <b>HLT</b>           | High-Level Term                                                  |
| <b>ICE</b>           | intercurrent event                                               |
| <b>ICH</b>           | International Council for Harmonisation                          |
| <b>ISR</b>           | injection site reaction                                          |
| <b>IWQOL-Lite-CT</b> | Impact of Weight on Quality of Life-Lite-Clinical Trials Version |
| <b>Lilly</b>         | Eli Lilly and Company                                            |
| <b>LLT</b>           | Lowest-Level Term                                                |
| <b>MACE</b>          | major adverse cardiovascular event(s)                            |
| <b>MedDRA</b>        | Medical Dictionary for Regulatory Activities                     |
| <b>mITT</b>          | modified intent-to-treat                                         |
| <b>MMRM</b>          | mixed model for repeated measures                                |
| <b>MRD</b>           | minimum required dilution                                        |
| <b>MTD</b>           | maximum tolerated dose                                           |
| <b>NAb(+/-)</b>      | neutralizing antibody (positive/negative)                        |
| <b>PF</b>            | Physical Function(ing)                                           |
| <b>PG</b>            | plasma glucose                                                   |
| <b>PGIS</b>          | Patient Global Impression of Status for Physical Activity        |
| <b>PHQ-9</b>         | Patient Health Questionnaire                                     |
| <b>PK</b>            | pharmacokinetic(s)                                               |
| <b>PT</b>            | Preferred Term                                                   |
| <b>QTcF</b>          | Fridericia's corrected QT interval                               |
| <b>QW</b>            | once weekly                                                      |
| <b>REML</b>          | restricted maximum likelihood                                    |
| <b>SAE</b>           | serious adverse event                                            |
| <b>SBP</b>           | systolic blood pressure                                          |
| <b>SD</b>            | standard deviation                                               |

---



---

|                     |                                                           |
|---------------------|-----------------------------------------------------------|
| <b>SF-36v2</b>      | Short Form-36 Version 2 Health Survey acute form          |
| <b>SI</b>           | Système International                                     |
| <b>SMQ</b>          | Standardized MedDRA Query                                 |
| <b>SOC</b>          | System Organ Class                                        |
| <b>SS</b>           | Safety Analysis Set                                       |
| <b>TBL</b>          | total bilirubin                                           |
| <b>TE ADA (+/-)</b> | treatment-emergent anti-drug antibody (positive/negative) |
| <b>TEAE</b>         | treatment-emergent adverse event                          |
| <b>TIMP</b>         | Trial Issues Management Plan                              |
| <b>T2DM</b>         | type 2 diabetes mellitus                                  |
| <b>UACR</b>         | urine albumin-to-creatinine ratio                         |
| <b>ULN</b>          | upper limit of normal                                     |

---

## Version History

This Statistical Analysis Plan (SAP) for Study I8F-MC-GPHM (GPHM) is based on the protocol dated 19 November 2020.

### SAP Version History Summary

| SAP Version | Approval Date      | Change                                      | Rationale                                   |
|-------------|--------------------|---------------------------------------------|---------------------------------------------|
| 1           | 25 Mar 2021        | Not applicable                              | Original version                            |
| 2           | 07 Oct 2022        | Details can be found in SAP Version History | Details can be found in SAP Version History |
| 3           | See date on Page 1 | See below                                   | See below                                   |

The key changes of the SAP Version 3 are summarized below:

1. In response to US Food and Drug Administration (FDA) feedback, clarified that the population-level summary for the “difference in response percentages between treatment conditions” is assessed by odds ratio (see Section [1.1.2.1](#)).
2. Clarified that placebo multiple imputation will be used for missing data imputation in Category 1 for treatment-regimen estimand if there are not enough retrieved dropouts to impute missing data in Category 2 (see Section [4.3.2.3](#)).
3. In response to US FDA feedback, added sensitivity analyses to evaluate the robustness of the primary efficacy results using different missing data imputation methods (see Section [4.3.2.4](#)).
4. Updated to add body weight at Visit 10 (Week 0) as an additional covariate to the mixed model for repeated measures (MMRM) models for the analyses of mean change in body weight, mean percent change in body weight, and mean change in body mass index (BMI) from Week -12 to Week 72. This covariate adjusts for body weight prior to randomization on the final outcome (see Section [4.4.2.1](#)).
5. Added exploratory endpoints to assess risk difference between tirzepatide maximum tolerated dose (MTD) and placebo arm for an unconditional effect in proportions of participants achieving body weight reduction targets (see Section [4.5](#)).

## **1. Introduction**

Changes to protocol-planned analyses are described in Section [4.9](#).

## 1.1. Objectives, Endpoints, and Estimands

### 1.1.1. Objectives and Endpoints

**Table GPHM.1.1. Objectives and Endpoints**

| Objectives                                                                                                                                                                                                                                                                                                            | Endpoints                                                                                                                                                                                                                                                                                                                                                                                                                                                                                                        |
|-----------------------------------------------------------------------------------------------------------------------------------------------------------------------------------------------------------------------------------------------------------------------------------------------------------------------|------------------------------------------------------------------------------------------------------------------------------------------------------------------------------------------------------------------------------------------------------------------------------------------------------------------------------------------------------------------------------------------------------------------------------------------------------------------------------------------------------------------|
| <b>Primary</b>                                                                                                                                                                                                                                                                                                        |                                                                                                                                                                                                                                                                                                                                                                                                                                                                                                                  |
| <p>To demonstrate that tirzepatide MTD is superior to placebo from randomization for the following (measured at 72 weeks):</p> <ul style="list-style-type: none"> <li>• Percent change in body weight AND</li> <li>• Proportion of participants with <math>\geq 5\%</math> body weight reduction</li> </ul>           | <ul style="list-style-type: none"> <li>• Mean percent change in body weight</li> <li>• Percentage of study participants who achieve <math>\geq 5\%</math> body weight reduction</li> </ul>                                                                                                                                                                                                                                                                                                                       |
| <b>Key Secondary (controlled for type I error)</b>                                                                                                                                                                                                                                                                    |                                                                                                                                                                                                                                                                                                                                                                                                                                                                                                                  |
| <p>To demonstrate that tirzepatide MTD is superior to placebo from randomization for the following (measured at 72 weeks):</p> <ul style="list-style-type: none"> <li>• Maintaining body weight reduction achieved during the 12-week lead-in period</li> <li>• Body weight</li> <li>• Waist circumference</li> </ul> | <ul style="list-style-type: none"> <li>• Percentage of study participants who maintain <math>\geq 80\%</math> of the body weight lost during the 12-week lead-in period</li> <li>• Percentage of study participants who achieve: <ul style="list-style-type: none"> <li>○ <math>\geq 10\%</math> body weight reduction</li> <li>○ <math>\geq 15\%</math> body weight reduction</li> <li>○ <math>\geq 20\%</math> body weight reduction</li> </ul> </li> <li>• Mean change in waist circumference (cm)</li> </ul> |
| <b>Additional Secondary</b>                                                                                                                                                                                                                                                                                           |                                                                                                                                                                                                                                                                                                                                                                                                                                                                                                                  |
| <p>Compare tirzepatide MTD QW with placebo from randomization for the following (measured at 72 weeks):</p> <ul style="list-style-type: none"> <li>• Body weight and BMI</li> <li>• Blood pressure</li> </ul>                                                                                                         | <ul style="list-style-type: none"> <li>• Mean change in body weight (kg)</li> <li>• Mean change in BMI (<math>\text{kg}/\text{m}^2</math>)</li> <li>• Mean change in <ul style="list-style-type: none"> <li>○ systolic blood pressure (mmHg)</li> <li>○ diastolic blood pressure (mmHg)</li> </ul> </li> </ul>                                                                                                                                                                                                   |

| Objectives                                                                                                                                                                                                                                                                                                                                                                                                      | Endpoints                                                                                                                                                                                                                                                                                                                                                                                                                                                                                                                                                                                                                                                                                                                                                                                                                                                                                                                                                                                                                                          |
|-----------------------------------------------------------------------------------------------------------------------------------------------------------------------------------------------------------------------------------------------------------------------------------------------------------------------------------------------------------------------------------------------------------------|----------------------------------------------------------------------------------------------------------------------------------------------------------------------------------------------------------------------------------------------------------------------------------------------------------------------------------------------------------------------------------------------------------------------------------------------------------------------------------------------------------------------------------------------------------------------------------------------------------------------------------------------------------------------------------------------------------------------------------------------------------------------------------------------------------------------------------------------------------------------------------------------------------------------------------------------------------------------------------------------------------------------------------------------------|
| <ul style="list-style-type: none"> <li>• Lipid parameters</li> <br/> <li>• Glycemic control</li> <br/> <li>• Insulin</li> <br/> <li>• Patient-reported outcomes</li> </ul> <p>Compare tirzepatide MTD QW with placebo from Visit 2 for the following (measured at 72 weeks):</p> <ul style="list-style-type: none"> <li>• Body weight and BMI</li> <br/> <br/> <br/> <br/> <li>• Waist circumference</li> </ul> | <ul style="list-style-type: none"> <li>• Mean change in:                             <ul style="list-style-type: none"> <li>○ Total cholesterol (mg/dL)</li> <li>○ HDL-C (mg/dL)</li> <li>○ Non-HDL-C (mg/dL)</li> <li>○ LDL-C (mg/dL)</li> <li>○ VLDL-C (mg/dL)</li> <li>○ Triglycerides (mg/dL)</li> <li>○ Free fatty acids (mg/dL)</li> </ul> </li> <br/> <li>• Mean change in                             <ul style="list-style-type: none"> <li>○ fasting glucose (mg/dL)</li> <li>○ HbA1c (%)</li> </ul> </li> <br/> <li>• Mean change in fasting insulin (pmol/L)</li> <br/> <li>• Mean change in                             <ul style="list-style-type: none"> <li>○ SF-36v2 acute form Physical Functioning domain score</li> <li>○ IWQOL-Lite-CT Physical Function composite score</li> </ul> </li> <br/> <br/> <li>• Mean change in absolute body weight (kg)</li> <li>• Mean percent change in body weight</li> <li>• Mean change in BMI (kg/m<sup>2</sup>)</li> <br/> <br/> <li>• Mean change in waist circumference (cm)</li> </ul> |

Abbreviations: BMI = body mass index; HbA1c = hemoglobin A1c; HDL-C = high-density lipoprotein cholesterol; IWQOL-Lite-CT = Impact of Weight on Quality of Life-Lite-Clinical Trials Version; LDL-C = low-density lipoprotein cholesterol; MTD = maximum tolerated dose; QW = once weekly; SF-36v2 acute form = Short Form-36 Version 2 Health Survey acute form; VLDL-C = very low-density lipoprotein cholesterol.

## 1.1.2. Estimands

### 1.1.2.1. Estimands for Co-Primary Endpoints

The primary clinical question of interest is: What is the intervention difference between the once weekly (QW) tirzepatide MTD (10 mg or 15 mg) and placebo in mean percent change in body weight and proportion of participants who achieve  $\geq 5\%$  body weight reduction from randomization to 72 weeks in participants without type 2 diabetes mellitus (T2DM), who have obesity (BMI  $\geq 30$  kg/m<sup>2</sup>), or are overweight (BMI  $\geq 27$  kg/m<sup>2</sup>) with at least 1 weight-related comorbid condition?

#### **For Primary Disclosure of Study GPHM, Including Submission to the US FDA**

The estimand is described by the following attributes:

- Population - Participants qualifying for study entry and randomization per protocol criteria.
- Co-primary endpoints - Percent change, from randomization to 72 weeks, in body weight AND participant status of achieving  $\geq 5\%$  body weight reduction from randomization to 72 weeks.
- Treatment condition of interest - Tirzepatide MTD versus placebo, regardless of study drug adherence.
- Handling of intercurrent events (ICEs) - The ICEs leading to treatment discontinuation for any reason are addressed by the treatment condition of interest attribute and handled by treatment policy strategy as described in the International Council for Harmonisation (ICH) E9 (R1) Addendum. Further details can be found in Section 4.3.2.1.
- Population-level summary - Difference in mean changes between treatment conditions AND difference in response percentage between treatment conditions as assessed by odds ratio.

#### ***Rationale for Estimand***

The estimand was requested by the FDA. It aims at reflecting how participants with obesity, or overweight with weight-related comorbidities, are treated in clinical practice, and it considers both safety and efficacy.

This *de facto estimand* is referred as the “treatment regimen” estimand in the latter sections of this document, which is equivalent to the “hybrid” estimand in the protocol.

#### **For All Other Purposes**

The estimand is described by the following attributes:

- Population - Participants qualifying for study entry and randomization per protocol criteria.
- Co-primary endpoints - Percent change from randomization to 72 weeks in body weight AND participant status of achieving  $\geq 5\%$  body weight reduction from randomization to 72 weeks.

- Treatment condition of interest - Tirzepatide MTD versus placebo, excluding data after discontinuation of study drug.
- Handling of ICEs - The ICEs leading to treatment discontinuation for any reason are addressed by the treatment condition of interest attribute and handled by the hypothetical strategy as described in the ICH E9 (R1) Addendum.
- Population-level summary - Difference in mean changes between treatment conditions AND difference in response percentage between treatment conditions as assessed by odds ratio.

### ***Rationale for Estimand***

The estimand aims to reflect treatment efficacy in an envisaged scenario in which the ICEs leading to treatment discontinuation would not occur.

This estimand is referred to as the “efficacy” estimand in the latter sections.

### **1.1.2.2. Estimands for Secondary Endpoints**

**Table GPHM.1.2. Attribute Description of Estimands for Secondary Endpoints**

| <b>Estimand for Secondary Endpoints</b>                                      | <b>Population</b>                          | <b>Endpoint</b>                                | <b>Treatment Condition of Interest</b>                                                                                                                                                                                          | <b>Handling of Intercurrent Events</b>                                                                                                                                                                                                 | <b>Population-Level Summary</b>                                       |
|------------------------------------------------------------------------------|--------------------------------------------|------------------------------------------------|---------------------------------------------------------------------------------------------------------------------------------------------------------------------------------------------------------------------------------|----------------------------------------------------------------------------------------------------------------------------------------------------------------------------------------------------------------------------------------|-----------------------------------------------------------------------|
| Key secondary related to mean change                                         | Same as estimands for co-primary endpoints | As described in <a href="#">Table GPHM.1.1</a> | For submission to the US FDA, follow the same manner of the treatment regimen estimand in <a href="#">Section 1.1.2.1</a> ; for all other purposes, the same manner of the efficacy estimand in <a href="#">Section 1.1.2.1</a> | For submission to the US FDA, follow the same manner of the treatment regimen estimand in <a href="#">Section 1.1.2.1</a> ; for all other purposes, follow the same manner of the efficacy estimand in <a href="#">Section 1.1.2.1</a> | Difference in mean changes between treatment conditions               |
| Key secondary related to percentage of participants meeting certain criteria |                                            |                                                |                                                                                                                                                                                                                                 |                                                                                                                                                                                                                                        | Difference in percentage of participants between treatment conditions |
| Other secondary related to mean change                                       | Same as estimands for co-primary endpoints | As described in <a href="#">Table GPHM.1.1</a> | Follow the same manner of the efficacy estimand in <a href="#">Section 1.1.2.1</a>                                                                                                                                              | Follow the same manner of the efficacy estimand in <a href="#">Section 1.1.2.1</a>                                                                                                                                                     | Difference in mean changes between treatment conditions               |

Note: Unless otherwise specified, the attributes of estimands for supporting exploratory objectives will follow the same manner of the efficacy estimand in [Section 1.1.2.1](#).



## 1.2. Study Design

Study GPHM is a Phase 3, multicenter, randomized, parallel-arm, placebo-controlled, double-blinded, 84-week study that will investigate the effects of treatment with the MTD of tirzepatide (10 mg or 15 mg QW) compared with placebo on body weight management of study participants who have obesity (BMI  $\geq 30$  kg/m<sup>2</sup>), or are overweight (BMI  $\geq 27$  kg/m<sup>2</sup>) with at least 1 weight-related comorbid condition, and achieved  $\geq 5\%$  weight reduction after a 12-week lead-in period with an intensive lifestyle modification program.

Study GPHM will consist of 4 periods:

- a 2-week screening period
- a 12-week lead-in period during which participants undertake an intensive lifestyle modification program to achieve  $\geq 5\%$  body weight reduction
- a 72-week, double-blind, placebo-controlled treatment period (including a 20-week dose escalation period), and
- a 4-week safety follow-up period.

Study participants who achieve at least 5% weight reduction will be randomized in a 1:1 ratio (tirzepatide MTD QW or placebo) at the end of the lead-in period. An upper limit of 70% enrollment of women will be used to ensure a sufficiently large sample of men.

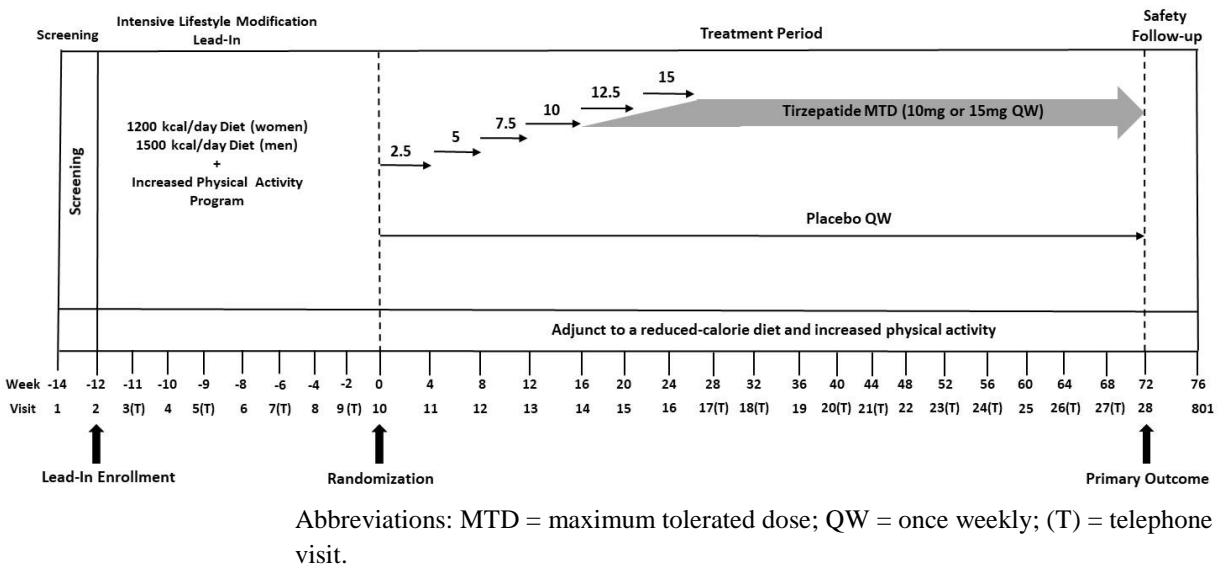

**Figure GPHM.1.1. Illustration of study design for Clinical Protocol I8F-MC-GPHM.**

The details about the overview of study periods and study visits can be found in the GPHM Protocol Section 4. The details of the unique visits not displayed in [Figure GPHM.1.1](#) are provided below.

**Visit 99**

Visit 99 is only applicable to participants who discontinue the study treatment prematurely (between Visit 10 and Visit 28) and decline to complete the remaining scheduled study visits. These participants will be asked to return for Visit 99 at 72 weeks  $\pm 7$  days after randomization. This visit is critical to ensure complete data collection for the primary endpoint.

**Early Discontinuation of Treatment Visit**

Participants unable or unwilling to continue the study intensive lifestyle intervention (during the lead-in period), or study drug intervention (during treatment period) for any reason, will perform an early discontinuation (ED) of treatment visit. If the participant is discontinuing during an unscheduled visit or a scheduled visit, that visit should be performed as the ED visit.

## 2. Statistical Hypotheses

The alternative hypothesis (H) for the primary objective is the following:

- H1 - QW tirzepatide MTD is superior to placebo for mean percent change in body weight AND the proportion of participants who achieve  $\geq 5\%$  body weight reduction from randomization to 72 weeks.
  - The above hypothesis will be tested at 2-sided significance level of 0.05.

The alternative hypotheses for the key secondary objectives controlling for type 1 error rate are the following:

- H2 - QW tirzepatide MTD is superior to placebo for the proportion of participants who maintain  $\geq 80\%$  of the body weight lost during the 12-week lead-in period (per evaluation at 72 weeks).
- H3 - QW tirzepatide MTD is superior to placebo for the proportion of participants who achieve  $\geq 10\%$  body weight reduction from randomization to 72 weeks.
- H4 - QW tirzepatide MTD is superior to placebo for the proportion of participants who achieve  $\geq 15\%$  body weight reduction from randomization to 72 weeks.
- H5 - QW tirzepatide MTD is superior to placebo for the proportion of participants who achieve  $\geq 20\%$  body weight reduction from randomization to 72 weeks.
- H6 - QW tirzepatide MTD is superior to placebo for the mean change in waist circumference (cm) from randomization to 72 weeks.

### 2.1. Multiplicity Adjustment

For primary and key secondary efficacy objectives, the details of type I error control strategy are illustrated in [Figure GPHM.2.1](#). Both efficacy estimand and treatment regimen estimand will be used to assess those objectives. As they are intended for different purposes, no multiplicity adjustments will be made for conducting separate analyses relative to the efficacy and treatment regimen estimands. In addition, no multiplicity adjustments will be made for evaluating other secondary and exploratory objectives and safety assessments.

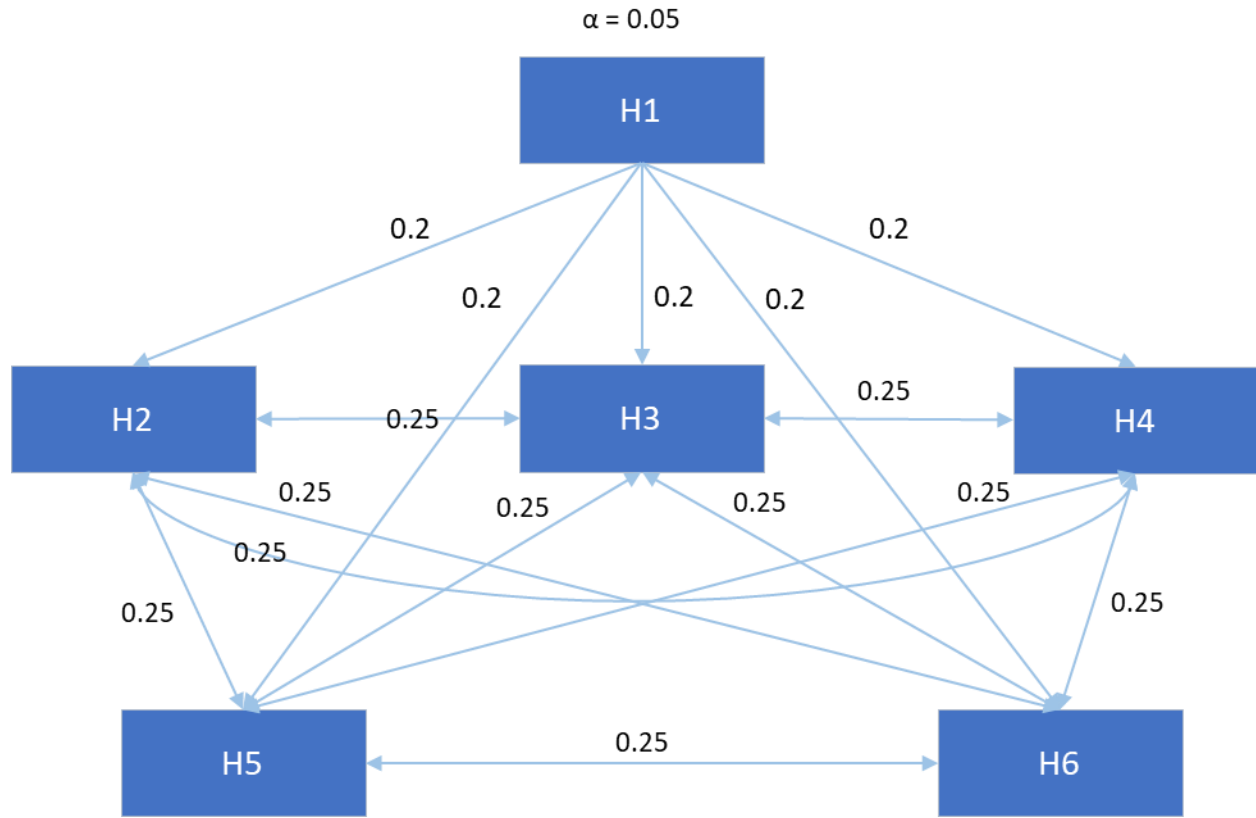

Abbreviation: H = hypothesis.

**Figure GPHM.2.1. Type 1 error control strategy for primary and key secondary efficacy endpoints.**

### 3. Analysis Sets

For purposes of analysis, the following populations are defined.

**Table GPHM.3.1. Description of Analysis Datasets**

| Population                      | Description                                                                                                                                                              |
|---------------------------------|--------------------------------------------------------------------------------------------------------------------------------------------------------------------------|
| Entered                         | All participants who sign informed consent                                                                                                                               |
| Enrolled                        | All participants who are enrolled in the 12-week lead-in period                                                                                                          |
| Randomized                      | All participants who are randomly assigned a study drug                                                                                                                  |
| Modified Intent-to-Treat (mITT) | All randomly assigned participants who are exposed to at least 1 dose of study drug. Participants will be included in the treatment group to which they were randomized. |
| Efficacy Analysis Set (EAS)     | Data obtained during the double-blind treatment period from the mITT population, excluding data after discontinuation of study drug (last dose date + 7 days)            |
| Full Analysis Set (FAS)         | Data obtained during the treatment period from the mITT population, regardless of adherence to study drug                                                                |
| Safety Analysis Set (SS)        | Data obtained during the treatment plus follow-up period from the mITT population, regardless of adherence to study drug                                                 |

Note: Unless otherwise specified, for analyses guided by the treatment regimen estimand, the FAS will be used. For analyses guided by the efficacy estimand, the EAS will be used, and for safety analysis, the SS will be used.

## 4. Statistical Analyses

### 4.1. General Considerations

Statistical analysis of this study will be the responsibility of Eli Lilly and Company (Lilly) or its designee. Some analyses and summaries described in this analysis plan may not be conducted if not warranted by data (for example, few events to justify conducting an analysis). Additional analyses of the data may be conducted as deemed appropriate.

Unless otherwise noted, all tests of treatment effects will be conducted at a 2-sided alpha level of 0.05, and the confidence interval (CI) will be calculated at 95%, 2-sided.

Unless specified otherwise, efficacy and safety will be assessed using the modified intent-to-treat (mITT) population, and data will be analyzed based on the assigned treatment (that is, not the actual treatment received by the participant). For submission to the US FDA to support the registration of tirzepatide for chronic weight management, the primary efficacy analysis will be conducted using the Full Analysis Set (FAS). For other purposes, the efficacy analysis of the double-blind period will be conducted using the Efficacy Analysis Set (EAS). Safety analysis of the double-blind period will be conducted using the Safety Analysis Set (SS).

Unless otherwise specified, for analyses in the double-blind period, baseline is defined as the last nonmissing data collected prior to or at randomization (prior to the first dosing of study drug). For analyses in the lead-in period, baseline is defined as the start of screening and ends prior to the intensive lifestyle modification program (typically at Week -12).

Summary statistics for continuous measures will include sample size, mean, standard deviation (SD), median, minimum, and maximum. The analysis model to make comparisons among treatment groups relative to continuous measurements assessed over time will be either analysis of covariance (ANCOVA) or an MMRM, with terms of treatment, visit, treatment-by-visit interaction, stratification factors, and corresponding baseline measurement as a covariate. An unstructured covariance structure will model the relationship of within-patient errors.

The Kaplan-Meier method will be used for estimation of cumulative event-free survival rates over time, and Cox proportional hazards regression analysis will be used to compare hazard rates among treatments.

Summary statistics for categorical measures (including categorized continuous measures) will include sample size, frequency, and percentages. Logistic regression will be used to examine the treatment difference in binary efficacy outcomes if there is a need to adjust for covariates. Otherwise, Fisher's exact test will be used to examine the treatment difference in categorical outcomes.

Summary statistics for discrete count measures will include sample size, mean, SD, median, minimum, and maximum.

For some specific safety-related parameters, the definition of baseline and postbaseline for the double-blind period is specified in [Table GPHM.4.1](#).

The definition of baseline and postbaseline during the intensive lifestyle modification lead-in period can be found in Appendix 4 (Section [6.4](#)).

**Table GPHM.4.1. Baseline and Postbaseline Definitions for Safety Groups**

| Analysis Set | Analysis Type                                                                                                    | Baseline                                                                                                                             | Postbaseline                                                                                                                                           |
|--------------|------------------------------------------------------------------------------------------------------------------|--------------------------------------------------------------------------------------------------------------------------------------|--------------------------------------------------------------------------------------------------------------------------------------------------------|
| SS           | 1.1) Treatment-emergent adverse events                                                                           | The baseline period is defined as ongoing at the time of the first dose of study drug in the double-blind treatment period.          | Starts after the first dose of study treatment and ends at the end of the study period (including off-drug follow-up visit)                            |
| SS           | 1.2) Treatment-emergent abnormal labs <sup>a</sup> , vital signs, and ECGs                                       | The last nonmissing assessment (scheduled or unscheduled) recorded at or prior to randomization to the double-blind treatment period | Postbaseline will be defined as measurements after the randomization visit. All scheduled and unscheduled measurements will be included.               |
| SS           | 1.3) Change from last baseline to Week xx and to last postbaseline for labs <sup>a</sup> , vital signs, and ECGs | The last nonmissing assessment (scheduled or unscheduled) recorded during the 12-week lead-in period                                 | Postbaseline will be defined as above (1.2). Only scheduled visits will be included. The early discontinuation visits are considered scheduled visits. |

Abbreviations: ECG = electrocardiogram; SS = Safety Analysis Set.

<sup>a</sup> Immunogenicity-related analysis is specified in Section 4.6.5.6.

For the primary and key secondary efficacy endpoint analyses subject to type 1 error rate control, data for participants with missing values at the 72-week visit will be imputed based on the method described in Section 4.3.2.3. Otherwise, missing values will not be explicitly imputed except for the parameters with only 1 postbaseline measure during the analysis period per the schedule of activity, where the last-observation-carried-forward (LOCF) approach will be applied to impute the endpoint when ED measure is available.

End of study participation for a participant will be the earliest of date of death, date of withdrawal from further participation in the study, or date of safety follow-up visit (Visit 801). For participants considered to be lost to follow-up, end of study participation will be the date of lost to follow-up reported by the investigator. Participant data included in the database after the last date of study participation will be excluded from statistical analysis.

Statistical summaries and results of statistical analyses will be displayed in the following order: Placebo, tirzepatide MTD.

Not all analyses described in this SAP will necessarily be included in the clinical study reports (CSRs). Any analysis described in this SAP and not provided in the CSR would be available upon request. Not all displays will necessarily be created as a “static” display. Some may be incorporated into interactive display tools instead of or in addition to a static display.

## 4.2. Participant Dispositions

A detailed description of participant disposition will be provided at the end of the study.

Frequency counts and percentages of all participants screened, enrolled, randomized, and receiving at least 1 dose of study drug will be summarized by treatment group, if applicable. Of the randomized population, frequency counts and percentages of participants who completed the study or prematurely discontinued the study (and/or study drug), including the reason for premature discontinuation, will be summarized by treatment group.

The study completion status for the randomized population is defined as following: participants with status reported via electronic case report form (eCRF) as “Completed” at the follow-up visit (Visit 801) will be considered as completers; otherwise, participants will be considered as noncompleters. A Kaplan-Meier analysis of time from randomization to premature discontinuation from the study and/or study treatment by treatment group will be provided.

A similar summary for the intensive lifestyle modification lead-in period can be found in Appendix 4 (Section 6.4).

### **4.3. Primary Endpoints Analysis**

For submission of Study GPHM to the US FDA to support the registration of tirzepatide for chronic weight management, both primary efficacy assessments will be guided by the treatment regimen estimand conducted using the FAS. Assessment of the primary objectives will be conducted with multiple imputation of missing data (see Section 4.3.2.3).

For other regulatory agencies, publications, and other purposes, the assessment of efficacy objectives may be guided by the efficacy estimand using the EAS.

#### **4.3.1. Definition of Endpoint**

The primary efficacy measure will be percent change in body weight AND percentage of participants who achieve  $\geq 5\%$  body weight reduction from randomization at 72 weeks. The percent change in body weight at each nominal visit is defined as follows:

$$\frac{(\text{postbaseline body weight [kg]} - \text{baseline body weight [kg]})}{\text{baseline body weight [kg]} * 100.}$$

Both percent change in body weight and percentage of participants who achieve  $\geq 5\%$  body weight reduction will be summarized by treatment and nominal visit (week) from randomization to 72 weeks.

#### **4.3.2. Main Analytical Approach**

##### **4.3.2.1. The Analysis Related to the Treatment Regimen Estimand**

The analysis related to treatment regimen estimand will be conducted using data in the FAS.

The analysis for the mean percent change in body weight will be conducted utilizing ANCOVA. The response variable for the ANCOVA model will be percent change in body weight from randomization at 72 weeks. A logistic regression model will be used for the analysis of the percentage of participants achieving at least 5% body weight reduction obtained at the 72-week visit. Both models will include terms of treatment group, country/pooled country, and sex as fixed effects and baseline body weight as a covariate. The ANCOVA analysis will be conducted with hybrid imputation of missing body weight at 72 weeks (see Section 4.3.2.3 for details) and statistical inference over multiple imputation of missing data guided by Rubin (1987). For the



logistic regression, missing body weight data at 72 weeks will be imputed first, based on Section 4.3.2.3, then the continuous measurements will be categorized into status of achieving at least 5% body weight reduction (Yes or No).

With the aid of the ANCOVA model, the 2-sided 95% CI for mean change in percentage of body weight from baseline to the Week 72 visit between tirzepatide MTD and placebo will be derived.

With the aid of the logistic regression model, the 2-sided 95% CI and odds ratio for percentage of participants achieving at least 5% body weight reduction from baseline to the Week 72 visit between tirzepatide MTD and placebo will be derived.

#### **4.3.2.2. The Analysis Related to the Efficacy Estimand**

The analysis related to the efficacy estimand will be conducted utilizing data in the EAS.

For the mean percentage of body weight change from randomization, an MMRM will be conducted. Restricted maximum likelihood (REML) will be used to obtain model parameter estimates, and the Kenward-Roger option will be used to estimate the denominator degrees of freedom. The response variable of MMRM will be the percent change in body weight from baseline values obtained at each scheduled postbaseline visit.

For the percentage of participants achieving at least 5% body weight reduction from randomization to the 72 weeks visit, a logistic regression model will be used with the response variable of the percentage of participants achieving at least 5% body weight reduction (Yes or No), with the missing value imputed using the predicted value from MMRM analysis followed by dichotomization. The terms for the logistic regression model will be the same as those for the treatment regimen estimand.

For the MMRM model, the independent variables of analysis model are treatment group, visit, and treatment-by-visit interaction; stratification factors (country and sex) as fixed effects; and baseline body weight as a covariate. An unstructured covariance structure will model the relationship of within-patient errors. If this model fails to converge, the following variance-covariance structures will be tested in order until convergence is achieved:

- heterogeneous Toeplitz
- heterogeneous first order autoregressive
- heterogeneous compound symmetry
- Toeplitz
- first order autoregressive, and
- compound symmetry.

The first covariance structure that converges will be used.

With the aid of the MMRM analysis, the 2-sided 95% CI for mean percent change in body weight from randomization to the 72 weeks visit for tirzepatide MTD compared to placebo will be derived and summarized. The resulting least-squares-mean estimates of mean percent change in body weight from baseline will be plotted by visit and by study treatment.

With the aid of the logistic regression model, the 2-sided 95% CI and odds ratio for percentage of participants achieving at least 5% body weight reduction from randomization to the 72-week visit for tirzepatide MTD compared to placebo will be summarized.

#### 4.3.2.3. Methods for Hybrid Imputations

For efficacy analyses relative to the treatment regimen estimand, the ICEs and the resulting missing values will be handled as follows:

- **Category 1** - For missing data solely due to exceptional circumstances, such as pandemic or natural disasters (after other reasons for missing data are ruled out), missing data are considered as missing at random. The missing data will be imputed using all non-missing data of the primary outcome measurement from the same treatment arm.
- **Category 2** - For missing data due to all other ICEs, missing data will be imputed based on retrieved dropouts in the same treatment arm, defined as observed primary outcome measurements, from participants in the same treatment group who had their efficacy assessed after ED of study drug. In cases where there are not enough retrieved dropouts to provide a reliable imputation model (for example, the model implemented by the statistical analysis software [SAS] program does not converge), an alternative multiple imputation method referencing the placebo group (that is, placebo multiple imputation) will be used.

In cases where placebo multiple imputation method is used for missing data imputation in Category 2 due to not enough retrieved dropouts, the missing data in Category 1 will be imputed using all nonmissing data of the primary outcome measurement from the placebo group.

#### 4.3.2.4. Sensitivity Analysis Related to Treatment Regimen Estimand

For submission of Study GPHM to the US FDA tirzepatide application for chronic weight management, additional sensitivity analyses of the primary efficacy outcomes will be conducted using the FAS and guided by treatment-regimen estimand, which represents the efficacy irrespective of adherence to study drug. This assessment will analyze percent change in body weight obtained at the 72-week visit using an ANCOVA and the percentage of participants achieving at least 5% body weight reduction obtained at the 72-week visit using a logistic regression model. The terms for both models will be the same as specified in Section 4.3.2.1. These analyses are intended to assess the robustness of primary efficacy results using different missing data imputation methods.

- Retrieved dropout multiple imputation: missing values of change in body weight at the 72-week visit will be imputed based on observed body weight change from randomization values at the visit from participants in the same treatment group who had their efficacy assessed after early discontinuation of study drug. In cases where there are not enough retrieved dropouts to provide a reliable imputation model (for example, the model implemented by the SAS program does not converge), the placebo multiple imputation method (described below) will be used.

- Placebo multiple imputation: missing values of change in body weight at the 72-week visit will be imputed based on observed body weight change from baseline values at the visit from participants in the placebo treatment group.
- Return to baseline imputation: missing values of body weight at the 72-week visit will be imputed using the return-to-baseline multiple imputation method to account for within subject variability (Qu and Dai 2022).

#### 4.4. Secondary Endpoint(s) Analysis

##### 4.4.1. Key Secondary Analyses Subject to Type 1 Error Rate Control

**Table GPHM.4.2. Secondary Measures Controlled for Type 1 Error**

| Objectives                                                                                                                                                           | Relative to the Efficacy Measure                                                                                                      | Analysis Conducted in a Manner Similar to                                                                                    | Additional Information                                       |
|----------------------------------------------------------------------------------------------------------------------------------------------------------------------|---------------------------------------------------------------------------------------------------------------------------------------|------------------------------------------------------------------------------------------------------------------------------|--------------------------------------------------------------|
| Tirzepatide MTD QW is superior to placebo from randomization for maintaining body weight reduction achieved during the 12-week lead-in period (measured at 72 weeks) | Percentage of study participants who maintain $\geq 80\%$ of the body weight lost during the 12-week lead-in period                   | Logistic model in Section 4.3.2.1 for treatment regimen estimand and logistic model in Section 4.3.2.2 for efficacy estimand |                                                              |
| Tirzepatide MTD QW is superior to placebo from randomization for body weight reduction (measured at 72 weeks)                                                        | Percentage of participants achieving body weight reduction $\geq 10\%$ , $\geq 15\%$ , and $\geq 20\%$ from randomization at 72 weeks | Logistic model in Section 4.3.2.1 for treatment regimen estimand and logistic model in Section 4.3.2.2 for efficacy estimand |                                                              |
| Tirzepatide MTD QW is superior to placebo from randomization for waist circumference reduction (measured at 72 weeks)                                                | Mean change in waist circumference (cm) from randomization at 72 weeks                                                                | ANCOVA model in Section 4.3.2.1 for treatment regimen estimand and MMRM model in Section 4.3.2.2 for efficacy estimand       | LSM estimates will be plotted by treatment through 72-weeks. |

Abbreviations: ANCOVA = analysis of covariance; LSM = least squares mean; MMRM = mixed model for repeated measures; MTD = maximum tolerated dose; QW = once weekly.

Decision will be guided by the 2-sided p-values in each objective, and details will be included in Section 2.1.

For submission of Study GPHM to the US FDA to support the registration of tirzepatide for chronic weight management, the key secondary efficacy assessment will be guided by the treatment regimen estimand, conducted using the same population as the primary analysis. Assessment of the key secondary objective will be conducted with hybrid imputation of missing data (see Section 4.3.2.3).

For other regulatory agencies, publications, and other purposes, the assessment of key secondary efficacy objectives may be guided by the efficacy estimand, using the same population as the primary analysis.

#### 4.4.2. Supportive Secondary Endpoints

Unless otherwise specified, other secondary and exploratory efficacy analyses will be guided by the efficacy estimand, using the same population as the primary analysis.

Analyses for labs will be performed for both Système International (SI) units and conventional (CN) units.

##### 4.4.2.1. Additional Secondary Efficacy Analyses

**Table GPHM.4.3. Secondary Measures Not Controlled for Type 1 Error**

| Objective                                                                                                             | Relative to the Efficacy Measure                                                                                          | Analysis Conducted in a Manner Similar to | Additional Information                                                                                                        |
|-----------------------------------------------------------------------------------------------------------------------|---------------------------------------------------------------------------------------------------------------------------|-------------------------------------------|-------------------------------------------------------------------------------------------------------------------------------|
| Compare tirzepatide MTD QW with placebo from randomization for body weight and BMI reduction (measured at 72 weeks)   | Mean change in body weight (kg) from randomization                                                                        | MMRM model in Section 4.3.2.2             | LSM estimates through 72 weeks will be plotted by study treatment.                                                            |
|                                                                                                                       | Mean change in BMI (kg/m <sup>2</sup> ) from randomization                                                                | MMRM model in Section 4.3.2.2             | LSM estimates through 72 weeks will be plotted by study treatment.                                                            |
| Compare tirzepatide MTD QW with placebo from randomization for blood pressure reduction (measured at 72 weeks)        | Mean change in systolic blood pressure (mmHg)                                                                             | MMRM model in Section 4.3.2.2             | LSM estimates through 72 weeks will be plotted by study treatment.                                                            |
|                                                                                                                       | Mean change in diastolic blood pressure (mmHg)                                                                            | MMRM model in Section 4.3.2.2             | LSM estimates through 72 weeks will be plotted by study treatment.                                                            |
| Compare tirzepatide MTD QW with placebo from randomization for improvement in lipid parameters (measured at 72 weeks) | Mean change in total cholesterol, HDL-C, non-HDL-C, LDL-C, VLDL-C, triglycerides, and free fatty acids from randomization | MMRM model in Section 4.3.2.2             | Estimated means through 72 weeks will be plotted by study treatment. Log transformation will be adopted for lipid parameters. |

| Objective                                                                                                                      | Relative to the Efficacy Measure                                                            | Analysis Conducted in a Manner Similar to                                                      | Additional Information                                                                                                                       |
|--------------------------------------------------------------------------------------------------------------------------------|---------------------------------------------------------------------------------------------|------------------------------------------------------------------------------------------------|----------------------------------------------------------------------------------------------------------------------------------------------|
| Compare tirzepatide MTD QW with placebo from randomization for improvement of glycemic control (measured at 72 weeks)          | Mean change in fasting glucose from randomization                                           | MMRM model in Section 4.3.2.2                                                                  | LSM estimates through 72 weeks will be plotted by study treatment.                                                                           |
|                                                                                                                                | Mean change in HbA1c from randomization                                                     | MMRM model in Section 4.3.2.2                                                                  | LSM estimates through 72 weeks will be plotted by study treatment.                                                                           |
| Compare tirzepatide MTD QW with placebo from randomization for insulin reduction (measured at 72 weeks)                        | Mean change in fasting insulin                                                              | MMRM model in Section 4.3.2.2                                                                  | Estimated means through 72 weeks will be plotted by study treatment. Log transformation will be adopted for fasting insulin.                 |
| Compare tirzepatide MTD QW with placebo from randomization for improvement of patient-reported outcomes (measured at 72 weeks) | Mean change in SF-36v2 acute form Physical Functioning (PF) domain score from randomization | ANCOVA model                                                                                   | Use terms of treatment, stratification factors, and baseline SF-36v2 PF score as a covariate. Missing data will be imputed using LOCF.       |
| Compare tirzepatide MTD QW with placebo from randomization for improvement of patient-reported outcomes (measured at 72 weeks) | Mean change in IWQOL-Lite-CT PF composite score from randomization                          | ANCOVA model                                                                                   | Use terms of treatment, stratification factors, and baseline IWQOL-Lite-CT PF score as a covariate. Missing data will be imputed using LOCF. |
| Compare tirzepatide MTD QW with placebo from Visit 2 for body weight and BMI reduction (measured at 72 weeks)                  | Mean change in absolute body weight (kg) from Visit 2                                       | MMRM model in Section 4.3.2.2 with body weight at Visit 10 (Week 0) as an additional covariate | LSM estimates through 72 weeks will be plotted by study treatment.                                                                           |
|                                                                                                                                | Mean percent change in body weight from Visit 2                                             | MMRM model in Section 4.3.2.2 with body weight at Visit 10 (Week 0) as an additional covariate |                                                                                                                                              |
|                                                                                                                                | Mean change in BMI (kg/m <sup>2</sup> ) from Visit 2                                        | MMRM model in Section 4.3.2.2 with body weight at Visit 10 (Week 0) as an additional covariate | LSM estimates through 72 weeks will be plotted by study treatment.                                                                           |

| Objective                                                                                                     | Relative to the Efficacy Measure        | Analysis Conducted in a Manner Similar to     | Additional Information                                             |
|---------------------------------------------------------------------------------------------------------------|-----------------------------------------|-----------------------------------------------|--------------------------------------------------------------------|
| Compare tirzepatide MTD QW with placebo from Visit 2 for waist circumference reduction (measured at 72 weeks) | Mean change in waist circumference (cm) | MMRM model in Section <a href="#">4.3.2.2</a> | LSM estimates through 72 weeks will be plotted by study treatment. |

Abbreviations: ANCOVA = analysis of covariance; BMI = body mass index; HbA1c = hemoglobin A1c; HDL-C = high-density lipoprotein cholesterol; IWQOL-Lite-CT = Impact of Weight on Quality of Life-Lite-Clinical Trials Version; LDL-C = low-density lipoprotein cholesterol; LOCF = last observation carried forward; LSM = least squares mean; MMRM = mixed model for repeated measures; QW = once weekly; SF-36v2 = Short Form 36 version 2 Health Survey; VLDL-C = very low-density lipoprotein cholesterol.

## 4.5. Exploratory Endpoints Analysis

**Table GPHM.4.4. Exploratory Efficacy Analysis**

| Objective                                                                                                                             | Relative to the Efficacy Measure                                                                                                                                                                                                                                                                                                                                 | Analysis Conducted                                                                                                                                                                                                                                                                                                                                                                                                                |
|---------------------------------------------------------------------------------------------------------------------------------------|------------------------------------------------------------------------------------------------------------------------------------------------------------------------------------------------------------------------------------------------------------------------------------------------------------------------------------------------------------------|-----------------------------------------------------------------------------------------------------------------------------------------------------------------------------------------------------------------------------------------------------------------------------------------------------------------------------------------------------------------------------------------------------------------------------------|
| Compare tirzepatide MTD QW with placebo for body weight reduction at 72 weeks                                                         | Percentage of participants achieving $\geq 25\%$ body weight reduction from randomization at 72 weeks                                                                                                                                                                                                                                                            | Logistic model in Section 4.3.2.2                                                                                                                                                                                                                                                                                                                                                                                                 |
| Compare tirzepatide MTD QW with placebo for body weight reduction at 72 weeks                                                         | Percentage of participants achieving $\geq 10\%$ , 15%, 20%, and 25% body weight reduction from Week -12 at 72 weeks                                                                                                                                                                                                                                             | Logistic model in Section 4.3.2.2                                                                                                                                                                                                                                                                                                                                                                                                 |
| Assess changes in BMI from Week -12 at Week 0                                                                                         | Percentage of participants whose BMI shifts between clinically relevant categories, that is, from Week -12 (<25, 25 to <30, 30 to <35, 35 to <40, $\geq 40$ ) to Week 0 (<25, 25 to <30, 30 to <35, 35 to <40, $\geq 40$ )                                                                                                                                       | Shift analysis will be conducted based on data from enrolled participants.                                                                                                                                                                                                                                                                                                                                                        |
| Compare tirzepatide MTD QW with placebo for BMI shifts from Week 0 at 72 weeks                                                        | Percentage of participants whose BMI shifts between clinically relevant categories, that is, from Week 0 (<25, 25 to <30, 30 to <35, 35 to <40, $\geq 40$ ) to 72 weeks (<25, 25 to <30, 30 to <35, 35 to <40, $\geq 40$ )                                                                                                                                       | Shift analysis will be conducted based on data from the EAS.                                                                                                                                                                                                                                                                                                                                                                      |
| Visualize tirzepatide MTD QW and placebo percentage of body weight reduction, from Week -12 up to the safety follow-up after 72 weeks | Percentage of body weight reduction from Week -12 to 72 weeks plus 4 weeks safety follow-up                                                                                                                                                                                                                                                                      | Time-course plot will be generated. Only the participants who complete the 72 weeks of treatment and have the safety follow-up visit (Visit 801) will be included.                                                                                                                                                                                                                                                                |
| Assess changes from Week -12 at Week 0 and compare tirzepatide MTD QW with placebo in parameters from Week -12 at 72 weeks            | Mean change in <ul style="list-style-type: none"> <li>• systolic blood pressure</li> <li>• diastolic blood pressure</li> <li>• total cholesterol</li> <li>• HDL-C</li> <li>• non-HDL-C</li> <li>• LDL-C</li> <li>• VLDL-C</li> <li>• triglycerides</li> <li>• free fatty acids</li> <li>• fasting glucose</li> <li>• HbA1c</li> <li>• fasting insulin</li> </ul> | For analysis from Week -12 at Week 0, change from baseline to postbaseline values at each scheduled visit will be summarized. Within-treatment difference will be assessed by a Wilcoxon signed-rank test.<br>For analysis from Week -12 at 72 weeks, the MMRM model in Section 4.3.2.2 for parameters with repeated measurements will be used. An ANCOVA model for parameters with only 1 postbaseline measurement will be used. |
| Assess changes in lipid parameters from Week -12 at Week 0                                                                            | Percentage of participants whose Lipid parameters shift between clinically relevant categories: <ul style="list-style-type: none"> <li>• LDL-C (&lt;70, 70 to &lt;160, 160 to &lt;190, <math>\geq 190</math> mg/dL)</li> <li>• HDL-C (male: &lt;40, <math>\geq 40</math>mg/dL, female: &lt;50, <math>\geq 50</math>mg/dL)</li> </ul>                             | Shift analysis will be conducted based on data from enrolled participants.                                                                                                                                                                                                                                                                                                                                                        |



|                                                                                                                  |                                                                                                                                                                                                                                                                                                                                                                                                                  |                                                                                                                                                                                                                                                        |
|------------------------------------------------------------------------------------------------------------------|------------------------------------------------------------------------------------------------------------------------------------------------------------------------------------------------------------------------------------------------------------------------------------------------------------------------------------------------------------------------------------------------------------------|--------------------------------------------------------------------------------------------------------------------------------------------------------------------------------------------------------------------------------------------------------|
|                                                                                                                  | <ul style="list-style-type: none"> <li>Triglycerides (&lt;150, 150 to &lt;170, 170 to &lt;500, ≥500mg/dL)</li> </ul>                                                                                                                                                                                                                                                                                             |                                                                                                                                                                                                                                                        |
| Compare tirzepatide MTD QW with placebo for changes in lipid parameters from Week 0 at 72 weeks                  | <p>Percentage of participants whose Lipid parameters shift between clinically relevant categories:</p> <ul style="list-style-type: none"> <li>LDL-C (&lt;70 mg/dL, 70 to &lt;160 mg/dL, 160 to &lt;190 mg/dL, ≥190 mg/dL)</li> <li>HDL-C (male: &lt;40 mg/dL, ≥40mg/dL, female: &lt;50 mg/dL, ≥50mg/dL)</li> <li>Triglycerides (&lt;150 mg/dL, 150 to &lt;170 mg/dL, 170 to &lt;500 mg/dL, ≥500mg/dL)</li> </ul> | Shift analysis will be conducted based on data from the EAS.                                                                                                                                                                                           |
| Assess change in fasting glucose category from Week -12 at Week 0                                                | Percentage of participant change in fasting glucose category, that is, from Week -12 (<100 mg/dL, 100-125 mg/dL, ≥126 mg/dL) to Week 0 (<100 mg/dL, 100-125 mg/dL, ≥126 mg/dL)                                                                                                                                                                                                                                   | Shift analysis will be conducted based on data from enrolled participants.                                                                                                                                                                             |
| Compare tirzepatide MTD QW with placebo for change in fasting glucose category from Week 0 at 72 weeks           | Percentage of participant change in fasting glucose category, that is, from Week 0 (<100 mg/dL, 100-125 mg/dL, ≥126 mg/dL) to 72 weeks (<100 mg/dL, 100-125 mg/dL, ≥126 mg/dL)                                                                                                                                                                                                                                   | Shift analysis will be conducted based on data from the EAS.                                                                                                                                                                                           |
| Assess change in HbA1c category from Week -12 at Week 0                                                          | Percentage of participant change HbA1c category, that is, from Week -12 (<5.7%, 5.7% to 6.4%, ≥6.5%) to Week 0 (<5.7%, 5.7% to 6.4%, ≥6.5%)                                                                                                                                                                                                                                                                      | Shift analysis will be conducted based on data from enrolled participants.                                                                                                                                                                             |
| Compare tirzepatide MTD QW with placebo for change in HbA1c category from Week 0 at 72 weeks                     | Percentage of participant change HbA1c category, that is, from Week 0 (<5.7%, 5.7% to 6.4%, ≥6.5%) to 72 weeks (<5.7%, 5.7% to 6.4%, ≥6.5%)                                                                                                                                                                                                                                                                      | Shift analysis will be conducted based on data from the EAS                                                                                                                                                                                            |
| Assess change for patient-reported outcome measurements change from Week -12 to Week 0                           | Mean change in patient-reported outcome measurements (Section 4.7.1)                                                                                                                                                                                                                                                                                                                                             | Data from Week -12 to Week 0 will be included. Change from baseline to postbaseline values at each scheduled visit will be summarized. Within-treatment difference will be assessed by a Wilcoxon signed-rank test.                                    |
| Compare tirzepatide MTD QW with placebo for patient-reported outcome measurements change from Week 0 to 72 weeks | Mean change in patient-reported outcome measurements (Section 4.7.1)                                                                                                                                                                                                                                                                                                                                             | Data from Week 0 to 72 weeks will be included. An ANCOVA model with terms of treatment (tirzepatide MTD, placebo), country/pooled country, sex, and corresponding baseline score as a covariate will be used. Missing data will be imputed using LOCF. |
| Compare tirzepatide MTD QW with placebo for patient-reported outcome measurements change                         | Mean change in patient-reported outcome measurements (Section 4.7.1)                                                                                                                                                                                                                                                                                                                                             | Data from Week -12 to 72 weeks will be included. An ANCOVA model with terms of treatment (tirzepatide MTD, placebo),                                                                                                                                   |



|                           |  |                                                                                                                                     |
|---------------------------|--|-------------------------------------------------------------------------------------------------------------------------------------|
| from Week -12 to 72 weeks |  | country/pooled country, sex, and corresponding baseline score as a covariate will be used. Missing data will be imputed using LOCF. |
|---------------------------|--|-------------------------------------------------------------------------------------------------------------------------------------|

Abbreviations: ANCOVA = analysis of covariance; BMI = body mass index; EAS = Efficacy Analysis Set; HbA1c = hemoglobin A1c; HDL-C = high-density lipoprotein cholesterol; LDL-C = low-density lipoprotein cholesterol; LOCF = last observation carried forward; MMRM = mixed model for repeated measures; MTD = maximum tolerated dose; QW = once-weekly; VLDL = very low-density lipoprotein cholesterol.

In addition, the following endpoint analyses to assess the risk difference in proportions for an unconditional treatment effect (Ge et al. 2011) between tirzepatide MTD and placebo arm may be conducted:

- percentage of participants achieving at least 5% body weight reduction from randomization at 72 weeks
- percentage of participants achieving at least 10% body weight reduction from randomization at 72 weeks
- percentage of participants achieving at least 15% body weight reduction from randomization at 72 weeks
- percentage of participants achieving at least 20% body weight reduction from randomization at 72 weeks
- percentage of participants achieving at least 25% body weight reduction from randomization at 72 weeks

#### 4.6. Safety Analyses

Unless specified otherwise, safety assessments for the double-blind period will be based on the SS (Table GPHM.3.1). All data collected between randomization and the end date of study participation will be included, regardless of the adherence to study drug.

Safety outcomes during the intensity lifestyle modification lead-in period will also be summarized for all enrolled participants. Detailed analyses can be found in Appendix 4 (Section 6.4).

The statistical assessment of homogeneity of the distribution of categorical safety responses between tirzepatide and placebo will be conducted using Fisher's exact test, unless specified otherwise.

The mean change from baseline differences among treatments at all scheduled visits will be assessed via an MMRM using REML. Unless specified otherwise, if the safety parameter is assessed at 72 weeks, then the model will include country/pooled country, sex, percentage of body weight reduction at the end of lead-in ( $<10\%$  and  $\geq 10\%$ ), treatment group, visit, and treatment-by-visit interaction as fixed effects and baseline value of the safety parameter as a covariate. To model the covariance structure within participants, the unstructured covariance matrix will be used. If this model fails to converge, the covariance structures specified in Section 4.3.2.2 will be tested in order until convergence is met. If the data do not warrant the MMRM model, then an ANCOVA model will be conducted.

For selected parameters, time-to-first-event analysis via the Cox proportional hazards model may be conducted. Participants without the event will be censored at the end of study participation.

For participants experiencing the event, the “time-to-first-event” will be the time (in weeks) from first dose to first occurrence of the event.

Where necessary, the rate of events will be analyzed using a generalized linear mixed model, assuming the number of events follows a negative binomial distribution, with treatment as a fixed effect. The logarithm of days during the active treatment period will be adjusted as an offset, to account for possible unequal treatment duration of follow-up between participants.

Unless otherwise specified, all the analyses listed in this section will be conducted using up to 72 weeks treatment period, plus the safety follow-up (Visit 801), for all randomized participants.

#### **4.6.1. Extent of Exposure**

The summary of duration of follow-up (defined as time in days from the date of randomization to the date of the last study visit) and/or duration on study treatment (defined as time in days from the date of first dose of study treatment to the date of last dose of study treatment plus 7 days) will be provided by treatment group using data from the SS over 72 weeks, plus safety follow-up (Visit 801), for all randomized participants.

For the summary of duration on study and study treatment, the frequency and percentage of participants falling into the following ranges will be summarized by planned treatment group as well:

- >0
- ≥4 weeks
- ≥8 weeks
- ≥12 weeks
- ≥16 weeks
- ≥20 weeks
- ≥24 weeks
- ≥36 weeks
- ≥48 weeks
- ≥52 weeks, and
- ≥72 weeks.

In addition, the frequency and percentages of participants falling into the following study and study treatment exposure ranges may be summarized by planned treatment group:

- 0 weeks
- >0 to <4 weeks
- ≥4 to <8 weeks
- ≥8 to <16 weeks
- ≥16 to <24 weeks
- ≥24 to <36 weeks
- ≥36 to <48 weeks
- ≥48 to <52 weeks
- ≥52 to <72 weeks, and
- ≥72 weeks.

No p-values will be reported in these summaries, as they are intended to describe the study populations rather than test hypotheses about them.

#### **4.6.2. Adverse Events**

##### **4.6.2.1. Treatment-Emergent Adverse Events**

A treatment-emergent adverse event (TEAE) is defined as an event that first occurred, or worsened in severity, after baseline (defined in [Table GPHM.4.1](#)). The Medical Dictionary for Regulatory Activities (MedDRA) Lowest-Level Term (LLT) will be used in the treatment-emergent derivation. The maximum severity for each LLT during the baseline period, including ongoing medical history, will be used as baseline severity. Events with a missing severity during the baseline period will be treated as “mild” in severity for determining treatment-emergence. Events with a missing severity during the postbaseline period will be treated as “severe”, and treatment-emergence will be determined by comparing to baseline severity.

For events occurring on the day of first taking study medication, the information collected in the case report form (CRF) (for example, treatment-emergent flag, start time of study treatment and event) will be used to determine whether the event was pre- or posttreatment. If the relevant information is not available, then the events will be counted as posttreatment.

In an overview table, the counts and percentages of participants who experienced a TEAE, serious adverse event (SAE), death, or discontinued from study and/or study treatment due to an adverse event (AE) will be summarized by treatment.

The counts and percentages of participants with TEAEs will be summarized by treatment using MedDRA Preferred Terms (PTs) nested within System Organ Class (SOC). Events will be ordered by decreasing frequency within SOC. System Organ Classes will be presented in alphabetical order. Statistical comparisons will be applied at both the SOC and PT levels. If necessary, the percentages of participants with TEAEs will also be summarized by treatment using MedDRA PT (without regard to SOC) by decreasing frequency.

The counts and percentages of participants with TEAEs will be summarized by maximum severity and treatment using MedDRA PTs. For each participant and TEAE, the maximum severity for the MedDRA PT is the maximum postbaseline severity observed from all associated LLTs mapping to the MedDRA PT. Maximum severity will be determined based on the nonmissing severities. If all severities are missing for the defined postbaseline period of interest, it will show as missing in the table.

##### **4.6.2.2. Common Adverse Events**

The counts and percentages of participants with TEAEs, overall and common (common TEAEs occurred in  $\geq 5\%$  of participants in any treatment group before rounding), will be summarized by treatment using MedDRA PT. Events will be ordered by decreasing frequency.

### **4.6.3. Additional Safety Assessments**

#### **4.6.3.1. Deaths**

A listing of all deaths during the study will be provided. The listing will include participant identification including the treatment, site number, participant number, date of death, age at the time of enrollment, sex, cause of death as reported by investigator, cause of death as adjudicated by the Clinical Evaluation Committee (CEC), and so on.

#### **4.6.3.2. Other Serious Adverse Events**

The counts and percentages of participants who experienced at least 1 SAE (including deaths and SAEs temporally associated with or preceding deaths) during the postbaseline period will be summarized by treatment using MedDRA PT nested within SOC. Events will be ordered by decreasing frequency within SOC. The SOCs will be in alphabetical order.

A listing of all SAEs will be provided. The listing will include treatment, participant identification including the site number, participant number, date of event, age at the time of enrollment, sex, MedDRA SOC and PT, reported term, severity, outcome, relationship to study drug, time from first dose of study drug to the event, AE start date, AE end date, severity, and action taken related to study treatment.

#### **4.6.3.3. Other Significant Adverse Events**

The counts and percentages of participants who discontinued from study treatment or study due to an AE during the postbaseline period may be summarized by treatment group using MedDRA PT nested within SOC. Events will be ordered by decreasing frequency within SOC.

#### **4.6.3.4. Vital Signs**

In the case that multiple measurements of an individual vital sign (for example, sitting SBP) are collected at the same visit, the mean of these measurements will be used for the analysis.

Vital signs (SBP, DBP, and pulse) will be summarized by treatment group at each planned visit. Change from baseline to postbaseline values for vital signs will be summarized for participants who have both a baseline and at least 1 postbaseline result. Treatment differences in mean change from baseline for vital signs will be assessed using the analysis model described in Section 4.6. Only planned measurements will be included in the mean change analyses.

The counts and percentages of participants with treatment-emergent abnormal (high or low) vital signs (sitting SBP, DBP, and pulse) at any time during the entire study (including the off-drug follow-up time period) will be summarized by treatment for participants who have both baseline and at least 1 postbaseline result. A treatment-emergent high result is defined as a change from a value less than or equal to the high limit at baseline to a value greater than the high limit at any time that meets the specified change criteria during the postbaseline period. A treatment-emergent low result is defined as a change from a value greater than or equal to the low limit at baseline to a value less than the low limit at any time that meets the specified change criteria during the postbaseline period. Both planned and unplanned measurements will be included in the analysis. The criteria for identifying participants with treatment-emergent vital signs abnormalities are listed in [Table GPHM.4.5](#).

**Table GPHM.4.5. Categorical Criteria for Abnormal Treatment-Emergent Blood Pressure and Pulse Measurements**

| Parameter                                                               | Low                                            | High                                                                                               |
|-------------------------------------------------------------------------|------------------------------------------------|----------------------------------------------------------------------------------------------------|
| Systolic BP (mm Hg)<br>(Supine or sitting -<br>forearm at heart level)  | $\leq 90$ and decrease from baseline $\geq 20$ | $\geq 140$ and increase from baseline $\geq 20$<br>$\geq 129$ and increase from baseline $\geq 20$ |
| Diastolic BP (mm Hg)<br>(Supine or sitting -<br>forearm at heart level) | $\leq 50$ and decrease from baseline $\geq 10$ | $\geq 90$ and increase from baseline $\geq 10$                                                     |
| Pulse (bpm)<br>(Supine or sitting)                                      | $< 50$ and decrease from baseline $\geq 15$    | $> 100$ and increase from baseline $\geq 15$                                                       |

Abbreviation: BP = blood pressure.

In addition, the following analyses will be conducted by treatment:

- counts and percentages of participants who had resting pulse increases from baseline at 2 or more consecutive visits of more than 10 bpm and/or 20 bpm
- counts and percentages of participants who had resting pulse increases from maximum baseline  $\geq 20$  bpm at any postbaseline visit
- counts and percentages of participants who had at least 1 resting pulse at any postbaseline visit exceeding 100 bpm, and
- counts and percentages of participants who had at least 1 resting pulse exceeding 100 bpm occurring at 2 or more consecutive study visits.

#### 4.6.3.5. Electrocardiograms

Summary statistics by treatment and by nominal visit will be provided for electrocardiogram (ECG) parameters (heart rate, PR, QRS, QT, and QT corrected using Fridericia's correction factor [QTcF] [ $QTcF = QT / RR^{0.333}$ ]). When the QRS is prolonged (for example, a complete bundle branch block), QT and QTc should not be used to assess ventricular repolarization. Thus, for a particular ECG, the following will be set to missing (for analysis purposes) when QRS is  $\geq 120$  msec: QT and QTcF.

Change from baseline to postbaseline values for ECG parameters will be summarized for participants who have both a baseline and at least 1 postbaseline result. Treatment differences in mean change from baseline for heart rate and PR interval will be assessed using the analysis model described in Section 4.6. Only planned measurements will be included in the mean change analyses.

The counts and percentages of participants who meet following criteria at any time during the entire study period (including the safety follow-up time period) will be summarized by treatment group:

- treatment-emergent ECG abnormalities as listed in [Table GPHM.4.6](#).
- QT greater than 500 msec

- QTcF greater than 480 msec
- QTcF greater than 500 msec, and
- treatment-emergent increase from the maximum baseline in QTcF interval of greater than 30 msec, 60 msec, or 75 msec. Maximum baseline (see [Table GPHM.4.1](#) for details) will be the maximum nonmissing observation in the baseline period. The maximum value during the treatment period will be analyzed. Scheduled and unscheduled measurements will be included.

**Table GPHM.4.6. Selected Categorical Limits for ECG Data**

| Parameter           | Low                     |                         | High                     |                          |
|---------------------|-------------------------|-------------------------|--------------------------|--------------------------|
|                     | Males                   | Females                 | Males                    | Females                  |
| Heart rate (bpm)    | <50 and decrease<br>≥15 | <50 and decrease<br>≥15 | >100 and increase<br>≥15 | >100 and increase<br>≥15 |
| PR interval (msec)  | <120                    | <120                    | ≥220                     | ≥220                     |
| QRS interval (msec) | <60                     | <60                     | ≥120                     | ≥120                     |
| QTcF (msec)         | <330                    | <340                    | >450                     | >470                     |

Abbreviations: ECG = electrocardiogram; QTcF = Fridericia's corrected QT interval.

#### 4.6.3.6. Clinical Laboratory Evaluation

Descriptive summaries at each planned visit, by treatment group, will be provided for the baseline and postbaseline values, and change from baseline values. The associated descriptive summaries will be presented in SI units and CN units. Limits from the performing laboratory will be used to define low and high.

Observed and change from baseline values for each visit may be displayed in plots for participants who have both a baseline and at least 1 postbaseline planned measurement. Baseline is defined in [Table GPHM.4.1](#). Unplanned measurements will be excluded from plots.

A shift table will be provided including unplanned measurements. The shift table will include the number and percentage of participants within each baseline category (minimum value is low, normal, high, or missing) versus each postbaseline category (minimum value is low, normal, high, or missing) by treatment. The Fisher's exact test will be used to compare percentages of participants who shift from normal/high to low between treatments.

For qualitative laboratory analytes, the number and percentage of participants with normal and abnormal values will be summarized by treatment.

A listing of abnormal findings will be created for laboratory analyte measurements, including qualitative measures. The listing will include participant identification, treatment group, laboratory collection date, study day, analyte name, and analyte finding.

The MMRM model, or ANCOVA (if the MMRM model is not applicable), will be used for the analysis during the treatment period for the continuous measurements for selected lab tests.

#### 4.6.4. Patient Narratives

The following are “notable” events, from start of study drug through the end of study participation:

- deaths
- SAEs
- permanent discontinuations of study treatment due to AEs, and
- pregnancies.

Patient narratives (participant-level data and descriptive paragraphs) will be provided for participants in the enrolled population with at least 1 notable event.

#### 4.6.5. Special Safety Topics

For AEs of special interest (AESI) or special safety topics, the counts and percentages of participants will be summarized by treatment and PT with decreasing frequency. Individual participant-level data may be presented. Displays with individual participant-level data may be created using various formats, such as a customized listing and/or a customized graphical patient profile. Adverse events of special interest are defined in each section of special safety topics, where applicable.

##### 4.6.5.1. Exocrine Pancreas Safety

###### 4.6.5.1.1. Pancreatic Enzyme

Observed pancreatic enzyme data (p-amylase and lipase) will be summarized by treatment. The counts and percentages of participants with maximum postbaseline pancreatic enzyme values exceeding the following thresholds will be provided by baseline pancreatic enzyme values ( $\leq$  upper limit of normal [ULN],  $>$  ULN) and postbaseline values ( $\leq 1 \times$  ULN,  $>1$  to  $\leq 3 \times$  ULN,  $>3$  to  $\leq 5 \times$  ULN,  $>5$  to  $\leq 10 \times$  ULN, and  $>10 \times$  ULN).

An MMRM analysis will be used to analyze each pancreatic enzyme with a log-transformed (postbaseline measure/baseline measure) response variable and treatment, nominal visit, treatment-by-nominal visit interaction as fixed effects.

###### 4.6.5.1.2. Pancreatitis Events

The counts and percentages of participants with pancreatitis will be presented for both investigator-reported events and subsequently confirmed adjudicated events. Detailed searching criteria can be found in Appendix 7 (Section 6.7).

Treatment-emergent, adjudication-confirmed pancreatitis will be considered as an AESI. Listings of participants with adjudicated pancreatitis may be provided if deemed necessary.

##### 4.6.5.2. Gastrointestinal Adverse Events

###### 4.6.5.2.1. Nausea, Vomiting, and Diarrhea

Summaries and analyses for the incidence and severity of nausea, vomiting (including “vomiting” and “vomiting projectile”), diarrhoea (including “diarrhea” and “diarrhoea”), and the



3 events combined will be provided by each treatment group. A summary of the prevalence over time for nausea, vomiting, and diarrhea will also be presented. Time to the first onset of nausea, vomiting, and diarrhea will be plotted.

#### **4.6.5.2.2. Severe Gastrointestinal Events**

Severe gastrointestinal (GI) AEs (GI SOC) will be captured with the AE-CRF form, and serious cases will be captured with the SAE form. The PTs in the GI SOC from the most recent MedDRA version at the time of DBL will be used to identify GI AEs, and only the PTs with severe/serious cases will be considered AESI.

The counts and percentages of participants with severe/serious GI events will be summarized by treatment.

### **4.6.5.3. Hepatobiliary Disorders**

#### **4.6.5.3.1. Hepatic Events**

The counts and percentages of participants with treatment-emergent, potentially drug-related hepatic events will be summarized by treatment using MedDRA PTs. Detailed searching criteria can be found in Appendix 7 (Section 6.7). Severe/serious hepatic events will be considered AESI and summarized separately.

#### **4.6.5.3.2. Acute Gallbladder Disease**

Events related to acute gallbladder disease will also be summarized by treatment groups by PTs with decreasing frequency. Detailed searching criteria can be found in Appendix 7 (Section 6.7).

Severe/serious acute gallbladder disease will be considered AESI and summarized separately.

#### **4.6.5.3.3. Liver Enzymes**

Common analyses for laboratory analyte measurements described in Section 4.6.3.6 are applicable for the liver-enzyme-related measurements. This section provides additional analyses for liver enzymes.

The counts and percentages of participants with the following elevations in hepatic laboratory tests at any time during the treatment period, and during the entire study including the follow-up period, will be summarized between treatment groups:

- The counts and percentages of participants with an alanine aminotransferase (ALT) measurement  $\geq 3$  times ( $3\times$ ), 5 times ( $5\times$ ), and 10 times ( $10\times$ ) the central lab ULN will be summarized for all participants with a postbaseline value and for subsets based on various levels of baseline value:
  - participants whose nonmissing maximum baseline value is  $\leq 1 \times$  ULN
  - participants whose maximum baseline is  $>1 \times$  ULN, and
  - participants whose baseline values are missing.
- The counts and percentages of participants with an aspartate aminotransferase measurement  $\geq 3 \times$ ,  $5 \times$ , and  $10 \times$  the central lab ULN will be summarized for all participants with a postbaseline value and for subsets based on various levels of baseline values, as described above for ALT.



- The counts and percentages of participants with a total bilirubin (TBL) measurement  $\geq 2 \times$  the central lab ULN will be summarized for all participants with a postbaseline value and for subsets based on various levels of baseline values:
  - participants whose nonmissing maximum baseline value is  $\leq 1 \times$  ULN
  - participants whose maximum baseline is  $>1 \times$  ULN, but  $<2 \times$  ULN
  - participants whose maximum baseline value is  $\geq 2 \times$  ULN, and
  - participants whose baseline values are missing.
- The counts and percentages of participants with a serum alkaline phosphatase measurement  $\geq 2 \times$  the central lab ULN will be summarized for all participants with a postbaseline value and for subsets based on various levels of baseline values, as described above for TBL.

Maximum baseline will be the maximum nonmissing observation in the baseline period. The maximum postbaseline value will be the maximum nonmissing value from the postbaseline period. Planned and unplanned measurements will be included.

#### 4.6.5.4. Hypoglycemia

The following categories in accordance with the 2020 American Diabetes Association position statement on glycemic targets (ADA 2020) will be defined in the database.

##### Glucose Alert Value (Level 1)

- **Documented symptomatic hypoglycemia** is defined as any time a participant feels that he/she is experiencing symptoms and/or signs associated with hypoglycemia and has a blood glucose (BG) level of  $<70$  mg/dL ( $<3.9$  mmol/L).
- **Documented asymptomatic hypoglycemia** is defined as any event not accompanied by typical symptoms of hypoglycemia but with a measured BG  $<70$  mg/dL ( $<3.9$  mmol/L).
- **Documented unspecified hypoglycemia** is defined as any event with no information about symptoms of hypoglycemia available but with a measured BG  $<70$  mg/dL ( $<3.9$  mmol/L).

##### Documented Clinically Significant Hypoglycemia (Level 2)

- **Documented symptomatic hypoglycemia** is defined as any time a participant feels that he/she is experiencing symptoms and/or signs associated with hypoglycemia and has a BG level of  $<54$  mg/dL ( $<3.0$  mmol/L).
- **Documented asymptomatic hypoglycemia** is defined as any event not accompanied by typical symptoms of hypoglycemia but with a measured BG  $<54$  mg/dL ( $<3.0$  mmol/L).
- **Documented unspecified hypoglycemia** is defined as any event with no information about symptoms of hypoglycemia available but with a measured BG  $<54$  mg/dL ( $<3.0$  mmol/L).

**Severe Hypoglycemia (Level 3)**

- **Severe hypoglycemia** is defined as an episode with severe cognitive impairment requiring the assistance of another person to actively administer carbohydrate, glucagon, or other resuscitative actions. These episodes may be associated with sufficient neuroglycopenia to induce seizure or coma. Plasma glucose (PG) measurements may not be available during such an event, but neurological recovery attributable to the restoration of PG to normal is considered sufficient evidence that the event was induced by a low PG concentration.

**Other Hypoglycemia Categories**

- **Nocturnal hypoglycemia** is defined as any hypoglycemic event that occurs between bedtime and waking.

To avoid duplicate reporting, all consecutive hypoglycemic events occurring within a 1-hour period will be considered to be a single hypoglycemic event.

Both the incidence (percentage of participants experiencing  $\geq 1$  episode) and the rate (episodes/participant/year) of Level 2 or Level 3 hypoglycemia, and Level 3 hypoglycemia, will be reported.

If a hypoglycemic event meets the criteria of severe, the event would specifically be collected as an SAE. Serious hypoglycemia is defined by pharmacovigilance criteria and will also be captured with an SAE form.

Severe/serious hypoglycemia will be considered AESI. The summaries of severe/serious hypoglycemia will be provided by treatment group. A listing of all events of severe/serious hypoglycemia may be provided, if deemed necessary. This listing will provide treatment allocation and clinical characteristics of the hypoglycemic event.

**4.6.5.5. Immunogenicity****4.6.5.5.1. Definitions of Sample ADA Status**

At a high level, an individual sample is potentially examined multiple times, in a hierarchical procedure, to produce a sample anti-drug antibodies (ADA) assay result, potentially multiple cross-reactive ADA assay results, and multiple neutralizing antibodies (NAb) assay results. The cut points used, the drug tolerance of each assay, and the possible values of titers are operating characteristics of the assay.

[Figure GPHM.4.1](#) details a flow chart that reflects the multitiered testing approach.

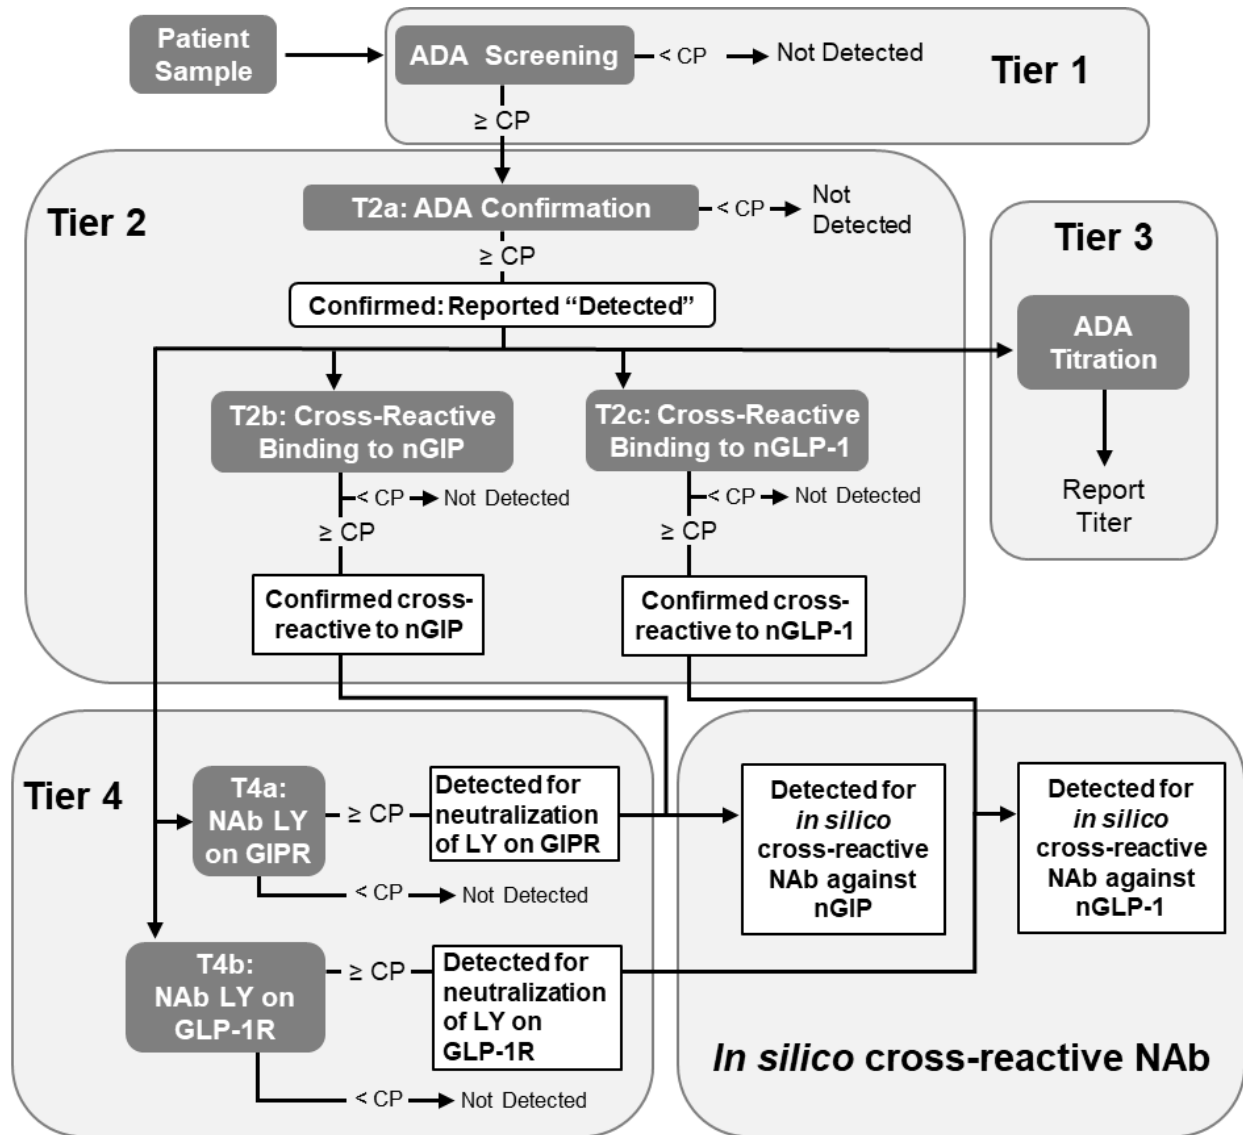

Abbreviations: ADA = anti-drug antibody; CP = cut point; GIPR = glucose-dependent insulinotropic polypeptide receptor; GLP-1R = glucagon-like peptide-1 receptor; LY = LY3298176 (tirzepatide); NAb = neutralizing antibody; nGIP = native glucose-dependent insulinotropic polypeptide receptor; nGLP-1 = native glucagon-like peptide-1.

**Figure GPHM.4.1. Flowchart of immunogenicity multitiered testing approach.**

Table GPHM.4.7 outlines results as reported from Tier 2a of the multitiered testing approach. Tier 4 results are reported similarly.

**Table GPHM.4.7. Sample Anti-Drug Antibodies (ADA) Assay Results**

| Sample Laboratory Result | Explanation                                                                                                                                                                        |
|--------------------------|------------------------------------------------------------------------------------------------------------------------------------------------------------------------------------|
| Detected                 | ADA are detected and confirmed.                                                                                                                                                    |
| Not Detected             | The raw result as reported from the laboratory indicates not detected. The clinical interpretation of such results depends on other factors (see <a href="#">Table GPHM.4.8</a> ). |
| NO TEST, QNS, etc.       | Sample exists but was unevaluable by the assay.                                                                                                                                    |

Abbreviations: ADA = anti-drug antibodies; QNS = quantity not sufficient.

It can be the case that the presence of high concentrations of tirzepatide will affect ADA immunoassays, and conversely high levels of ADA may affect the measurement of tirzepatide concentration. Thus, a tirzepatide drug concentration, assessed from a sample drawn at the same time as the ADA sample, plays a key role in clinical interpretation of a sample when the laboratory result is Not Detected (see [Table GPHM.4.8](#)).

**Table GPHM.4.8. Sample Clinical Anti-Drug Antibodies Interpretation Results**

| Sample Clinical Interpretation | Explanation                                                                                                                                                                                                                                                                                                                                                                                                                                                                                                                          |
|--------------------------------|--------------------------------------------------------------------------------------------------------------------------------------------------------------------------------------------------------------------------------------------------------------------------------------------------------------------------------------------------------------------------------------------------------------------------------------------------------------------------------------------------------------------------------------|
| ADA Present                    | ADA assay result is Detected.                                                                                                                                                                                                                                                                                                                                                                                                                                                                                                        |
| ADA Not Present                | ADA assay result is Not Detected, and simultaneous drug concentration is at a level that has been demonstrated to not interfere in the ADA detection method (that is, drug concentration is below the assay's drug tolerance level).<br><br>For participants receiving placebo, drug concentration is not assessed and is assumed to be below the assay's drug tolerance level.<br><br>If drug concentration was planned but is not available for a treatment-period sample, a Not Detected sample will be declared ADA Not Present. |
| ADA Inconclusive               | ADA assay result is Not Detected, but the drug concentration in the sample is greater than or equal to the assay's drug tolerance level, which may cause interference in the ADA detection method.                                                                                                                                                                                                                                                                                                                                   |

Abbreviations: ADA = antidrug antibodies.

All ADA-present samples will be evaluated for cross-reactivity to native glucose-dependent insulinotropic polypeptide (GIP) (Tier 2b), cross-reactivity to native glucagon-like peptide-1 (GLP-1) (Tier 2c), NAb tirzepatide on the GIPR receptor (GIPR) (Tier 4a), and NAb LY (tirzepatide) on the GLP-1 receptor (GLP-1R) (Tier 4b). If cross-reactive ADA against native GIP is detected, the *in silico* assessment for cross-reactive NAb against native GIP is evaluated. If cross-reactive ADA against GLP-1 is detected, the *in silico* assessment for cross-reactive NAb against native GLP-1 is evaluated ([Figure GPHM.4.1](#)).

Similar terminology to [Table GPHM.4.8](#) applies for each type of cross-reactive and NAb assay. Importantly, each of these is a distinct assay and, in general, has different assay operating characteristics.

The following are considered inconclusive for the NAb result:

- NAb tirzepatide on GIPR - If an NAb result is not detected and pharmacokinetic (PK) concentration is greater than or equal to the drug tolerance limit of the NAb tirzepatide on the GIPR assay.
- NAb tirzepatide on GLP-1R - If an NAb result is not detected and PK concentration is greater than or equal to the drug tolerance limit of the NAb tirzepatide on the GLP-1R assay.

An *in silico* method utilizing results from Tiers 2b and 2c, Tiers 4a and 4b, and tirzepatide concentrations is used to determine cross-reactive NAb against native GIP and GLP-1. The *in silico* method is outlined in [Table GPHM.4.9](#).

**Table GPHM.4.9. *In Silico* Classification for Cross-Reactive NAb**

| <i>In Silico</i> Classification | Cross-Reactive ADA Result | NAb Result                                                                          | Circulating Tirzepatide Level (ng/mL) | <i>In Silico</i> Cross-Reactive NAb Interpretation |
|---------------------------------|---------------------------|-------------------------------------------------------------------------------------|---------------------------------------|----------------------------------------------------|
| Cross-Reactive                  | Tier 2b: Not Detected     | Tier 4a: Not Detected or Detected<br><i>or</i><br>Tier 4a: Detected, NA, or Missing | Any value or missing                  | Not Present                                        |
| NAb to nGIP                     | Tier 2b: Detected         | Tier 4a: Not Detected                                                               | < drug tolerance limit of the assay   | Not Present                                        |
|                                 | Tier 2b: Detected         | Tier 4a: Not Detected                                                               | ≥ drug tolerance limit of the assay   | Inconclusive                                       |
|                                 | Tier 2b: Detected         | Tier 4a: Detected                                                                   | < drug tolerance limit of the assay   | Present                                            |
|                                 | Tier 2b: Detected         | Tier 4a: Detected                                                                   | ≥ drug tolerance limit of the assay   | Present                                            |
| Cross-Reactive                  | Tier 2c: Not Detected     | Tier 4b: Not Detected or Detected<br><i>or</i><br>Tier 4b: Detected, NA, or Missing | Any value or missing                  | Not Present                                        |
| NAb to nGLP-1                   | Tier 2c: Detected         | Tier 4b: Not Detected                                                               | < drug tolerance limit of the assay   | Not Present                                        |
|                                 | Tier 2c: Detected         | Tier 4b: Not Detected                                                               | ≥ drug tolerance limit of the assay   | Inconclusive                                       |
|                                 | Tier 2c: Detected         | Tier 4b: Detected                                                                   | < drug tolerance limit of the assay   | Present                                            |

| <i>In Silico</i><br>Classification | Cross-Reactive ADA<br>Result | NAb Result        | Circulating<br>Tirzepatide<br>Level (ng/mL) | <i>In Silico</i> Cross-<br>Reactive NAb<br>Interpretation |
|------------------------------------|------------------------------|-------------------|---------------------------------------------|-----------------------------------------------------------|
|                                    | Tier 2c: Detected            | Tier 4b: Detected | ≥ drug tolerance<br>limit of the assay      | Present                                                   |

Abbreviations: ADA = anti-drug antibodies; NA = not applicable; NAb = neutralizing antibody; nGIP = native glucose-dependent insulintropic polypeptide; nGLP-1 = native glucagon-like peptide-1; Tier 2b = cross-reactive ADA to nGIP; Tier 2c = cross-reactive ADA to nGLP-1; Tier 4a = NAb LY (tirzepatide) on GIPR; Tier 4b = NAb LY (tirzepatide) on GLP-1R.

Note that, in the case of an ADA Inconclusive sample, each of the NAb and Cross-Reactive NAb assay results are taken to be Inconclusive.

Note also that any reference to an assay cut point and/or drug tolerance is population specific and is subject to modification to study-specific parameters per regulatory guidance.

#### 4.6.5.5.2. *Definitions of Immunogenicity Assessment Periods*

##### **Immunogenicity Baseline Observations**

The baseline period for immunogenicity assessment for each participant includes all observations prior to the first dose of study treatment. In instances where multiple baseline observations are collected, to determine participant ADA status, the last nonmissing immunogenicity assessment prior to first administration of study drug is used to determine treatment-emergent status (see below).

##### **Immunogenicity Postbaseline Period Observations**

Postbaseline period observations for each participant include all observations after the first administration of study drug. There are 2 different periods:

- The planned treatment period is defined as from the first dose of treatment to end of the treatment period.
- The entire postbaseline period is defined as from the first dose of treatment to the end of the safety follow-up visit or the date of study withdrawal.

#### 4.6.5.5.3. *Definitions of Participant ADA Status*

##### **Participants Evaluable for Treatment-Emergent ADA (TE ADA)**

A participant is evaluable for TE ADA if the participant has a nonmissing baseline ADA result and at least 1 nonmissing postbaseline ADA result.

##### **TE-ADA-Unevaluable Participants**

A TE ADA-unevaluable participant is any participant who does not meet the evaluable criteria.

##### **Baseline ADA Present (preexisting antibody)**

Anti-drug antibodies are detected in a sample collected up to the first dose date and time.

**Baseline ADA Not Present**

Anti-drug antibodies are not detected, and the corresponding PK concentrations are missing or are below the drug tolerance limit in a sample collected up to the first dose date and time.

**Treatment-Emergent ADA-Positive (TE ADA+) Participants**

A participant who is evaluable for TE ADA is TE ADA+ if either of the following holds:

- The participant has baseline status of ADA Not Present and at least 1 postbaseline status of ADA Present with titer  $\geq 2 \times$  the minimum required dilution (MRD) of the ADA assay.
- The participant has baseline and postbaseline status of ADA Present, with the postbaseline titer being 2 dilutions (4-fold) greater than the baseline titer. That is, the participant has a baseline status of ADA Present, with a titer of 1:baseline, and at least 1 postbaseline status of ADA Present, with a titer of 1:postbaseline, with postbaseline divided by baseline  $\geq 4$ .

As shown in [Figure GPHM.4.1](#), a titer is expected when an ADA assay result is Detected. On occasion, the corresponding assay cannot be performed, in which case a titer value will be imputed for the purpose of TE ADA determination. A baseline sample with detected ADA and no titer is imputed to be the MRD (1:10), and a postbaseline sample with ADA detected and no titer is imputed to be 1 dilution above the MRD (1:20).

**Treatment-Emergent ADA-Inconclusive Participants**

A participant who is evaluable for TE ADA is TE ADA Inconclusive if  $\geq 20\%$  of the participant's postbaseline samples are ADA Inconclusive and all remaining postbaseline samples are ADA Not Present.

**Treatment-Emergent ADA-Negative (TE ADA-) Participants**

A participant who is evaluable for TE ADA is TE ADA- when the participant is not TE ADA+ and the participant is not TE ADA Inconclusive.

For each NAb assay, the following are defined:

- NAb-positive (NAb+) participant - A participant who is TE ADA+ and has an NAb positive sample in the postbaseline period.
- NAb-Inconclusive participant - A participant who is TE ADA+, is not NAb+, and all samples that have TE ADA+ titer have an NAb Inconclusive sample result.
- NAb-negative (NAb-) participant - A participant is NAb- when the participant is neither NAb+ nor NAb Inconclusive.

Unless specified otherwise, the above-mentioned definitions of NAb are applicable to all NAb analyses, including cross-reactive NAb analyses and cross-reactive antibodies.

**4.6.5.5.4. Analyses to be Performed**

The count and proportion of participants who are TE ADA+ will be tabulated by treatment group, where proportions are relative to the number of participants who are TE ADA evaluable, as defined above. The tabulation will include the number and proportion of participants with

ADA Present at baseline and the number and proportion of TE-ADA+ participants exhibiting each type of cross-reactive antibody and NAb. This analysis will be performed for the following periods:

- the planned treatment period, and
- the entire postbaseline period, including safety follow-up.

The *in silico* classification for cross-reactive NAb will be summarized.

A summary will be provided of the count and percentage of tirzepatide-treated participants experiencing a specific TEAE (see [Table GPHM.4.10](#)) by participant TE-ADA status (TE ADA+, TE ADA-, or TE ADA Inconclusive).

**Table GPHM.4.10. Adverse Events for Analysis with Immunogenicity Results**

| TEAE Category              | Criteria                                       |
|----------------------------|------------------------------------------------|
| Hypersensitivity reactions | Anaphylaxis SMQ (narrow or algorithm)          |
|                            | Hypersensitivity SMQ (narrow)                  |
|                            | Angioedema SMQ (narrow)                        |
|                            | Severe Cutaneous Adverse Reaction SMQ (narrow) |
|                            | Vasculitis SMQ (narrow)                        |
| Injection site reactions   | Injection site reaction HLT                    |
|                            | Infusion site reaction HLT                     |
|                            | Administration site reaction HLT               |

Abbreviations: HLT = High-Level Term; MedDRA = Medical Dictionary for Regulatory Activities; SMQ = Standardized MedDRA Query; TEAE = treatment-emergent adverse event.

A listing will be provided for all participants who had ADA Present at any time (including baseline) or had any specific TEAE (see [Table GPHM.4.10](#)). This listing includes a time course of ADA (clinical interpretation result plus flags for samples meeting TE ADA+ criteria and for samples with cross-reactive antibodies and NAb present) along with the TEAE.

Cases of TE ADA that are associated with AEs of either severe/serious hypersensitivity or severe/serious injection site reaction (ISR) will be classified as AESI.

Additional immunogenicity analyses, as determined later, may be presented. The relationship between antibody titers, the PK parameters, and pharmacodynamic (PD) response to tirzepatide may also be assessed.

#### 4.6.5.6. Hypersensitivity Reactions

Two main analyses are performed in support of assessment of potential immediate hypersensitivity, including anaphylaxis, as well as potential nonimmediate hypersensitivity.

**Time Period A** of potential immediate hypersensitivity includes all TEAEs occurring from start of study drug administration up to 24 hours after end of study drug administration. For events without the hypersensitivity eCRF, only date (no time) information is collected. If such events occurred on the same date as the study drug injection date, they will be included in Time Period A.



**Time Period B** of potential nonimmediate hypersensitivity includes all TEAEs occurring more than 24 hours after the end of study drug administration but prior to subsequent drug administration.

The counts and percentages of participants who experienced a hypersensitivity TEAE will be summarized by PT with decreasing frequency by treatment.

Analyses for both time periods are based on the following:

- narrow and algorithm terms in the Anaphylactic reaction Standardized MedDRA Query (SMQ) (20000021) (note that the Anaphylactic reaction SMQ algorithm will only be summarized for Time Period A)
- narrow terms in the Angioedema SMQ (20000024)
- narrow terms in the Severe cutaneous adverse reactions SMQ (20000020)
- narrow terms in the Hypersensitivity SMQ (20000214), and
- narrow terms in the Vasculitis SMQ (20000174).

For the Anaphylactic reaction SMQ, each term is classified by scope (narrow, broad) and by category (A, B, C, D). All narrow terms are Category A, and all broad terms are Category B, C, or D. In addition to the usual narrow and broad searches, the SMQ defines an algorithm to further refine the cases of interest. For Time Period A analysis, the Anaphylactic reaction SMQ algorithm will be included. The algorithm is based upon events that occur within Time Period A.

The counts and percentages of participants who experienced a TEAE for the following will be analyzed for each of the 2 time periods:

- any narrow term from any one of the 5 SMQs indicated above (that is, combined search across the narrow scope of all 5 SMQs), and
- any narrow term within each SMQ, separately (that is, narrow SMQ search)
  - for Time Period A analysis, any term from the Anaphylactic reaction SMQ algorithm.

Within queries, individual PTs that satisfied the queries will be summarized. For Time Period A analysis, the Anaphylactic reaction SMQ algorithm will be summarized. Also, a single event may satisfy multiple SMQs, in which case, the event contributes to every applicable SMQ.

#### **4.6.5.6.1. *Serious Hypersensitivity Reactions***

The severe/serious cases of hypersensitivity will be considered AESI. A summary with severe/serious hypersensitivity reactions may be provided, if deemed necessary.

#### **4.6.5.7. *Injection Site Reaction***

Injection site reactions, incidence and rates, and related information reported via the “Injection Site Reactions” eCRF will be summarized by treatment. Information to be summarized includes the location of the reaction, timing of the reaction relative to study drug administration, and characteristics of the ISR: erythema, induration, pain, pruritis, and edema.

Patient-based analysis and event-based analysis may be provided if necessary. The patient-based analysis summarizes all ISR questionnaire forms for an individual participant with a single statistic, typically an extreme value. This analysis allows each participant to contribute only once for each parameter, at the expense of a focus on the most extreme events. By contrast, the event-based analysis summarizes all ISR questionnaire forms received, without regard to individual participants. This provides characteristics of ISR events as a proportion of all events for which questionnaire responses were provided, at the expense of some potential bias due to differential contribution of individual participants to the analysis.

The counts and percentages of participants with treatment-emergent ISRs will be summarized by treatment using MedDRA PTs. Detailed searching criteria can be found in Appendix 7 (Section 6.7).

The PT will be summarized in decreasing order of incidence for tirzepatide-treated participants.

#### **4.6.5.7.1. Severe/Serious Injection Site Reactions**

The severe/serious treatment-emergent ISRs, based on the TEAE search criteria specified in Appendix 6.7 (Section 6.7), will be considered AESI. The counts and percentages of participants with severe/serious ISRs will be summarized by treatment. A listing of participants with treatment-emergent severe/serious ISRs may be provided, if deemed necessary.

#### **4.6.5.8. Major Adverse Cardiovascular Events**

The following positively adjudicated major adverse cardiovascular events (MACE) will be considered AESI:

- death due to cardiovascular AEs
- myocardial infarction
- hospitalization for unstable angina
- hospitalization for heart failure
- coronary interventions (such as coronary artery bypass graft or percutaneous coronary intervention), and
- cerebrovascular events, including cerebrovascular accident (stroke) and transient ischemic attack.

The counts and percentages of participants with positively adjudicated MACE may be summarized by treatment.

A listing of participants reporting MACE events, either reported by the investigator or identified by the CEC, may be provided.

In addition, MACE reported by the investigator may be summarized, although a MACE reported by the investigator and not positively adjudicated is not considered an AESI.

#### 4.6.5.9. Major Depressive Disorder/Suicidal Ideation

The severe/serious major depressive disorder/suicidal ideation or behavior will be captured as AESI. Adverse events will be searched using MedDRA PTs. Detailed searching criteria can be found in Appendix 7 (Section 6.7).

The counts and percentages of participants with TEAEs will be summarized by treatment group using MedDRA PT nested within SMQ. Events will be ordered by decreasing frequency nested within SMQ. A listing of participants with major depressive disorder/suicidal ideation or behavior may be provided if deemed necessary.

In addition to spontaneously reported AEs assessed by the investigator, suicidal ideation and behavior and depression will be assessed through the use of the Columbia-Suicide Severity Rating Scale (C-SSRS) and the Patient Health Questionnaire (PHQ-9), respectively.

##### 4.6.5.9.1. Patient Health Questionnaire

Total scores for the PHQ-9 range from 0 to 27 with total scores being categorized as follows:

- None (not depressed) - 0 to 4.
- Mild - 5 to 9.
- Moderate - 10 to 14.
- Moderately Severe - 15 to 19.
- Severe - 20 to 27.

Shift tables will be provided showing the counts and percentages of participants within each baseline category (maximum value) versus each postbaseline category (maximum value) by treatment.

Additionally, the following 3 outcomes of interest will be compared between treatments (based on the maximum value during baseline and postbaseline):

- Any increase in depression category (that is, worsening of depression) - Includes participants in the none, mild, moderate, or moderately severe categories during baseline with at least 1 postbaseline measurement.
- Increase from no or mild depression to moderate, moderately severe or Severe depression - Includes participants in the none or mild depression category during baseline with at least 1 postbaseline measurement.
- Increase from mild or moderate depression to moderately severe or severe depression - includes participants in the mild or moderate depression category during baseline and at least 1 postbaseline measurement.

##### 4.6.5.9.2. Suicidal Ideation and Behavior Solicited Through C-SSRS

Suicide-related thoughts and behaviors occurring during the entire study period, based on the C-SSRS, will be summarized by treatment group. In particular, for each of the following suicide-related events, the counts and percentages of participants with the event will be summarized by treatment group:

- died by suicide
- nonfatal suicide attempt
- interrupted attempt
- aborted attempt
- preparatory acts or behavior
- active suicidal ideation with a specific plan and intent
- active suicidal ideation with some intent to act without a specific plan
- active suicidal ideation with any methods (no plan) without an intent to act
- nonspecific active suicidal thoughts
- wish to be dead, and
- nonsuicidal, self-injurious behavior.

In addition, the counts and percentages of participants who experienced at least 1 of the composite measures will be presented. The participants with at least 1 postbaseline C-SSRS assessment are included. The composite measure is determined at each assessment by the “yes” or “no” responses in C-SSRS categories by the study participant:

- Category 1 - Wish to be Dead.
- Category 2 - Non-Specific Active Suicidal Thoughts.
- Category 3 - Active Suicidal Ideation with Any Methods (Not Plan) without Intent to Act.
- Category 4 - Active Suicidal Ideation with Some Intent to Act, without Specific Plan.
- Category 5 - Active Suicidal Ideation with Specific Plan and Intent.
- Category 6 - Preparatory Acts or Behavior.
- Category 7 - Aborted Attempt.
- Category 8 - Interrupted Attempt.
- Category 9 - Actual Attempt (non-fatal).
- Category 10 - Completed Suicide.

Composite endpoints of suicidal ideation and suicidal behavior based on the above categories are defined below:

- **Suicidal ideation** - A “yes” answer at any time during study to any 1 of the 5 suicidal ideation questions (Categories 1 through 5) on the C-SSRS.
- **Suicidal behavior** - A “yes” answer at any time during study to any 1 of the 5 suicidal behavior questions (Categories 6 through 10) on the C-SSRS.

- **Suicidal ideation or behavior** - A “yes” answer at any time during study to any 1 of the 10 suicidal ideation and behavior questions (Categories 1 through 10) on the C-SSRS.

A listing containing data for each participant with suicidal ideation, suicidal behavior, or nonsuicidal self-injurious behavior during the study by treatment and visit may be provided. Data from all visits are displayed, regardless of a “yes” or “no” answer, for participants with any “yes” answer for suicidal ideation, suicidal behavior, or self-injurious behavior without suicidal intent.

#### **4.6.5.10. Malignancy**

Malignancy will be considered as an AESI. The counts and percentages of participants with treatment-emergent malignancy will be summarized by treatment and PT ordered by decreasing frequency. Detailed searching criteria can be found in Appendix 7 (Section 6.7).

#### **4.6.5.11. Renal Safety**

Laboratory measures related to renal safety will be analyzed as specified for laboratory measurements in Section 4.6.3.6.

Additionally, 2 shift tables examining renal function will be created. A minimum-to-minimum shift table of estimated glomerular filtration rate (eGFR) will be estimated by the Chronic Kidney Disease Epidemiology Collaboration (CKD-EPI) equation with units of mL/min/1.73m<sup>2</sup>, using categories of <30, ≥30 to <45, ≥45 to <60, ≥60, and ≥90 mL/min/1.73m<sup>2</sup>. A max-to-max shift table of urine albumin-to-creatinine ratio (UACR) will be created, using the categories of UACR<30 mg/g, 30 mg/g ≤UACR≤300 mg/g, and UACR>300 mg/g (respectively, these represent normal, microalbuminuria, and macroalbuminuria).

Mixed model for repeated measure analyses for eGFR and UACR will be provided. Log transformation will be performed for UACR.

##### **4.6.5.11.1. Acute Renal Events**

Acute renal events, including those associated with chronic renal failure exacerbation, will also be captured.

Severe/serious renal events from the SMQ search below will be considered AESI.

The counts and percentages of participants with acute renal events will be summarized by treatment by using MedDRA PTs contained in any of the following SMQs:

- **Acute renal failure:**
  - narrow terms in the Acute renal failure SMQ (20000003)
- **Chronic kidney disease:**
  - narrow terms in the Chronic kidney disease SMQ (20000213).

In addition, a listing of participants with treatment-emergent acute renal events may be provided, if deemed necessary.

#### **4.6.5.11.2. Dehydration**

Dehydration events will be captured in the following SMQ and summarized. Severe/serious dehydration events will be considered AESI:

- narrow terms in the Dehydration SMQ (20000232).

The counts and percentages of participants with dehydration will be summarized by treatment and PT and ordered by decreasing frequency. A listing of participants with treatment-emergent dehydration events may be provided, if deemed necessary.

#### **4.6.5.12. Thyroid Safety Monitoring**

##### **4.6.5.12.1. Calcitonin**

The number and proportion of participants with a maximum postbaseline calcitonin value in the following thresholds will be provided by treatment and baseline calcitonin value ( $\leq 20$  ng/L,  $>20$  ng/L to  $\leq 35$  ng/L,  $>35$  ng/L) and postbaseline value ( $\leq 20$  ng/L,  $>20$  ng/L to  $\leq 35$  ng/L,  $>35$  ng/L to  $\leq 50$  ng/L,  $>50$  ng/L to  $\leq 100$  ng/L, and  $>100$  ng/L).

##### **4.6.5.12.2. C-Cell Hyperplasia and Thyroid Malignancies**

Thyroid malignancies and C-cell hyperplasia will be considered AESI. Detailed searching criteria can be found in Appendix 6.7 (Section 6.7).

The counts and percentages of participants with treatment-emergent thyroid C-cell hyperplasia and malignancies will be summarized by treatment and PT ordered with decreasing frequency. In addition, a listing of participants with treatment-emergent thyroid C-cell hyperplasia and neoplasms may be provided if deemed necessary.

#### **4.6.5.13. Treatment-Emergent Arrhythmias and Cardiac Conduction Disorders**

The treatment-emergent arrhythmias and cardiac conduction disorders events will be identified using MedDRA PTs. Detailed searching criteria can be found in Appendix 7 (Section 6.7).

The counts and percentages of participants with treatment-emergent arrhythmias and cardiac conduction disorders will be summarized by treatment and PT nested within SMQ. The PT will be ordered with decreasing frequency within SMQ. A listing of participants with treatment-emergent arrhythmias and cardiac conduction disorders may be provided if deemed necessary.

#### **4.6.5.14. Severe/serious treatment-emergent arrhythmias and cardiac conduction disorders will be considered AESI and summarized separately. Treatment of Overdose**

Overdose is defined as taking more than 15 mg of tirzepatide in less than 72 hours. Overdosing of tirzepatide will be summarized by treatment group, and a listing of participants with tirzepatide overdosing will be provided.

In addition, a listing of participants reporting AEs related to overdosing of tirzepatide may be provided.

#### **4.6.5.15. Abuse Potential**

To identify AE terms suggestive of abuse liability potential, narrow terms from the Drug abuse and dependence SMQ (20000101) will be used. Counts and percentages of participants will be summarized by treatment group with decreasing frequency.

### **4.7. Other Analyses**

#### **4.7.1. Health Outcomes**

The patient-reported outcome questionnaires will be analyzed using the mITT population on the EAS, unless specified otherwise.

Item-level missingness is dealt with as per the instrument developers' instruction.

Additional psychometric analyses may be performed by the Value Evidence Outcomes group at Lilly and documented in a separate analysis plan.

##### **4.7.1.1. Patient Global Impression of Status for Physical Activity**

The counts and percentages of participants for Patient Global Impression of Status for Physical Activity (PGIS) response categories will be summarized by nominal visit and by treatment. A shift table from baseline to postbaseline of 5 PGIS response categories at each postbaseline visit by treatment will be created.

##### **4.7.1.2. Short-Form-36 Health Survey Version 2, Acute Form**

Per copyright owner, the QualityMetric Health Outcomes™ Scoring Software 4.5 will be used to derive the following domain and component scores:

- Mental Component Summary (MCS)
- Physical Component Summary (PCS)
- Physical Functioning (PF) domain
- Role-Physical domain (RP)
- Bodily Pain (BP) domain
- General Health domain (GH)
- Vitality domain (VT)
- Social Functioning domain (SF)
- Role-Emotional domain (RE), and
- Mental Health domain (MH).

For each above domain and component summary score parameter, the raw scores will be transformed into the domain scores (t-scores), and the following analyses for the actual value and change from baseline value will be conducted:

- descriptive summaries by treatment group, and

- analysis described in [Table GPHM.4.3](#) and [Table GPHM.4.4](#).

The empirical cumulative distribution function (eCDF) curves of the change from baseline to 72 weeks in Short Form-36 Version 2 Health Survey acute form (SF-36v2) PF domain scores will be provided by treatment group.

If data allow, analysis for SF-36v2 PF domain scores described in [Table GPHM.4.3](#) will be conducted to evaluate the treatment effect in participants who have limitations in PF at baseline, which are defined as PGIS responses at baseline of “moderately limited,” “very much limited,” or “extremely limited.”

#### 4.7.1.3. Impact of Weight on Quality of Life-Lite Clinical Trials

The following parameters will be included from the Impact of Weight on Quality of Life-Lite-Clinical Trials Version (IWQOL-Lite-CT):

- IWQOL Lite CT total score (all items: items 1 through 20)
- PF composite score (5 items: items 1 through 3, 16, 17)
- Physical composite score (7 items: item 1 through 5, 16, 17), and
- Psychosocial composite score (13 items: item 6 through 15, 18, 19, 20).

The IWQOL-Lite-CT total and composite scores range from 0 to 100, with higher scores reflecting better levels of functioning.

The IWQOL-Lite-CT scores are computed according to the IWQOL-Lite scoring rules (Kolotkin et al. 2002) as follows:

- Each composite raw score will be calculated if a minimum of 50% of the items for that composite has a nonmissing value; the total score will be calculated if a minimum of 75% of all 20 items has a nonmissing value.
- If the minimum required number of items is answered for a composite, then
  - Calculate the average of the valid nonmissing responses corresponding to the items in the total or each composite (1 = “never” or “not at all true” and 5 = “always” or “completely true”).
  - The composite score is then calculated by transforming the raw composite score to the 0 (worst)-to-100 (best) metric using the following formula for every patient at each time point:

$$100 (S_{max} - C_{avg}) / (S_{max} - S_{min})$$

- $C_{avg}$  is the raw average score of all nonmissing item responses in the composite; this average must be a number between 1 and 5, inclusive.
- $S_{max}$  is the maximum possible raw score value (that is, 5).
- $S_{min}$  is the minimum possible raw score value (that is, 1).
- Inserting the maximum and minimum possible score values, the formula is reduced to  $100 (5 - C_{avg}) / 4$ .



For total and each composite score, the following analyses for the actual value and change from baseline value will be conducted:

- descriptive summaries by treatment group, and
- ANCOVA analysis described in [Table GPHM.4.3](#) and [Table GPHM.4.4](#).

If data allow, IWQOL-Lite-CT PF composite score analysis described in [Table GPHM.4.3](#) will be conducted to evaluate the treatment effect in participants who have limitations in PF at baseline (as defined in Section [4.7.1.2](#)).

#### **4.7.1.4. EQ-5D-5L**

For the utility score and the Visual Analog Scale (VAS) scores, the following analyses of the actual value and change from baseline value will be conducted:

- descriptive summaries by treatment group, and
- analyses described in [Table GPHM.4.4](#).

#### **4.7.2. Subgroup Analyses**

Efficacy subgroup analyses will be guided by the treatment-regimen estimand in the FAS and the efficacy estimand in the EAS.

Subgroup analyses may be done by country to support local regulatory registrations.

##### **4.7.2.1. Subgroup Analysis of Body Weight Change**

Subgroup analyses by the following baseline characteristics will be provided:

- age (<65, ≥65 years)
- sex (female and male)
- race
- ethnicity
- BMI at randomization (<30, ≥30 and <35, ≥35 and <40, ≥40 kg/m<sup>2</sup>)
- region of enrollment (US, outside of US), and
- percentage of body weight reduction at the end of lead-in (<10% and ≥10%).

The outcome measures for the subgroup analyses will include

- percent change in body weight from randomization at 72 weeks, and
- proportion of participants achieving at least 5% body weight reduction from randomization to 72 weeks.

For the percent change in body weight from randomization at 72 weeks, for each subgroup analyses aforementioned, the following analyses will be conducted.

#### **Treatment Regimen Estimand**

- Conduct the ANCOVA model on the subgroup only with terms of treatment group, country/pooled country, and sex as fixed effects and baseline body weight as a covariate. Missing body weight measurements at 72 weeks will be imputed using the imputation method described in Section 4.3.2.3.
- Full ANCOVA model - Treatment group, subgroup, treatment-by-subgroup-interaction, country/pooled country, and sex as fixed effects and baseline body weight as a covariate. Missing body weight measurements at 72 weeks will be imputed using the imputation method described in Section 4.3.2.3.

**Efficacy Estimand**

- Conduct the MMRM model on the subgroup only with terms of treatment group, visit, treatment-by-visit-interaction, country/pooled country, and sex as fixed effects, and baseline body weight as a covariate. The variance-covariance structure for within-patient errors will be same as Section 4.3.2.2.
- Full MMRM model - Treatment group, visit, subgroup, treatment-by-visit-interaction, treatment-by-subgroup-interaction, subgroup-by-visit-interaction, treatment-visit-subgroup-interaction, country/pooled country, and sex as fixed effects and baseline body weight as a covariate. The variance-covariance structure for within-patient errors will be same as Section 4.3.2.2.

For the percentage of participants achieving at least 5% body weight reduction at 72 weeks, for each subgroup analyses aforementioned, the following analyses will be conducted.

**Treatment Regimen Estimand**

- Conduct the logistic regression model on the subgroup only with terms of treatment group, country/pooled country, and sex as fixed effects and baseline body weight as a covariate. Missing body weight measurements at 72 weeks will be imputed using the imputation method described in Section 4.3.2.3, then the continuous measurements will be dichotomized into status of achieving at least 5% body weight reduction (Yes or No).
- Full logistic regression model - Treatment group, subgroup, treatment-by-subgroup-interaction, country/pooled country, and sex as fixed effects and baseline body weight as a covariate. Missing body weight measurement at 72 weeks will be imputed using the imputation method described in Section 4.3.2.3, then the continuous measurements will be dichotomized into status of achieving at least 5% body weight reduction (Yes or No).

**Efficacy Estimand**

- Conduct the logistic regression model on the subgroup with terms of treatment group, country/pooled country, and sex as fixed effects and baseline body weight as covariate. Missing body weight measurement at 72 weeks will be imputed by the predicted value from the MMRM model on the subgroup aforementioned, then the continuous measurements will be dichotomized into status of achieving at least 5% body weight reduction (Yes or No).

- Conduct the logistic regression model with terms of treatment group, subgroup, treatment-by-subgroup-interaction, country/pooled country, and sex as fixed effects and baseline body weight as a covariate. Missing body weight measurement at 72 weeks will be imputed by the predicted value from the full MMRM model aforementioned, then the continuous measurements will be dichotomized into status of achieving at least 5% body weight reduction (Yes or No).

#### **4.8. Interim Analyses**

Not applicable.

#### **4.9. Changes to Protocol-Planned Analyses**

To provide data on efficacy of the investigational product that would be valuable to better inform clinical decisions in management of people living with obesity, protocol-planned objectives are changed as below.

##### **Key Secondary Objectives**

- added the key secondary objective, “QW tirzepatide MTD is superior to placebo for proportion of participants who achieve  $\geq 20\%$  body weight reduction from randomization to 72 weeks”

##### **Additional Secondary Objectives**

- added the additional secondary objective, “Compare QW tirzepatide MTD with placebo for mean change in Non-HDL-cholesterol (mg/dL) from randomization to 72 weeks”

##### **Subgroup Analysis for Primary Analysis**

- added the subgroup variable, “region of enrollment (US, outside of US)” for both outcome measures

## 5. Sample Size Determination

Approximately 1100 participants will be screened, and 800 participants will be enrolled into the 12-week lead-in period in order to achieve approximately 600 participants randomly assigned to study drug intervention (300 participants per treatment group).

The sample size determination assumes that evaluation of superiority of tirzepatide MTD (10 mg or 15 mg) to placebo will be conducted at a 2-sided significance level of 0.05 using a 2-sample t-test. Additionally, a difference of at least 12% in mean body weight percentage reduction from randomization at 72 weeks for tirzepatide MTD compared to placebo, a common SD of 10%, and a dropout rate of 25% are assumed for statistical power calculations. Under the assumptions above, randomizing 600 participants in a 1:1 ratio to MTD (300 participants) and placebo (300 participants) provides more than 90% power to demonstrate superiority of tirzepatide MTD to placebo.

The chosen sample size and randomization ratio also provides >90% power to establish superiority of tirzepatide MTD to placebo in terms of proportion of participants achieving at least 5% body weight reduction from randomization at 72 weeks, based on a Chi-square test at a 2-sided significance level of 0.05, assuming 20% of placebo-treated participants and 46% of tirzepatide-treated participants achieve the goal and a dropout rate of 25%.

## **6. Supporting Documentation**

### **6.1. Appendix 1: Demographic and Baseline Characteristics**

#### **6.1.1. Patient Characteristics**

A listing of participant demographics for all randomized participants will be provided. All demographic and baseline clinical characteristics will be summarized by study treatment for all randomized participants. Baseline demographic and clinical characteristics of special interest include but are not limited to age (years), sex (female, male), race, ethnicity, height (cm), weight (kg), BMI (kg/m<sup>2</sup>), waist circumference (cm), age group (<65 years, ≥65 years), BMI group (<30, ≥30 and <35, ≥35 and <40, ≥40 kg/m<sup>2</sup>), country, and weight-related comorbidities.

#### **6.1.2. Historical Illnesses and Preexisting Conditions**

The count and percentages of participants with historical illnesses and preexisting conditions will be summarized by treatment group using MedDRA PTs nested within SOC. The SOCs will be in alphabetical order. Conditions (that is, PTs) will be ordered by decreasing frequency within SOC. This will be summarized for all randomized participants.

#### **6.1.3. Concomitant Therapy**

Concomitant medications will be summarized by PTs by treatment group by decreasing frequency for the SS group. The following postbaseline period will be considered:

- up to 72 weeks plus the safety follow-up (Visit 801) for all randomized participants.

Additionally, concomitant medications of interest (as defined below) will be summarized by treatment for the SS.

Concomitant medications of interest include the following:

- baseline antihypertensive therapy, by type/class
- baseline lipid lowering therapy, by type/class
- changes to baseline medication postrandomization
  - antihypertensive therapy, and
  - lipid lowering therapy.
- utilization after randomization of
  - medicines that cause weight gain,
  - antihyperglycemic medication for the treatment of diabetes for participants who develop T2DM during the study (antihyperglycemic medication for the treatment of prediabetes is not allowed per protocol)
  - antidiarrheal medication, and
  - antiemetic medication.

The analysis of concomitant medication for the lead-in period is provided in Appendix 4 (Section 6.4).

## 6.2. Appendix 2: Treatment Compliance

A summary of participants who prematurely discontinued study treatment (including discontinuation reason) will be provided by study treatment. A time-to-event analysis of premature study treatment discontinuation will also be conducted.

The analyses related to compliance during the 72-week treatment period will be conducted for all randomized participants.

If data warrant, the counts and percentages of participants who follow the planned escalation scheme, have dose interruption, or have dose de-escalation/re-escalation will be summarized for the tirzepatide treatment group. In addition, the proportion of participants receiving 2.5 mg, 5 mg, 7.5 mg, 10 mg, 12.5 mg, or 15 mg may be presented by visit during the dose escalation period.

Treatment compliance will be defined as taking at least 75% of the scheduled study treatment doses. Compliance over the double-blind treatment period will be calculated using the number of doses administered (regardless of the actual dose in mg administered), divided by the total number of doses expected to be administered  $\times 100$  over the double-blind treatment period, respectively. Treatment compliance will be summarized descriptively over the double-blind treatment period by treatment using the mITT population.

## 6.3. Appendix 3: Important Protocol Deviations

Important protocol deviations are identified in the Trial Issues Management Plan (TIMP). A listing and a summary of important protocol deviations by treatment will be provided at the end of the study for all randomized participants.

## 6.4. Appendix 4: Analyses for the Intensive Lifestyle Modification Lead-in Period

### 6.4.1. General Consideration

Unless specified otherwise, all analyses for the lead-in period will be based on all enrolled participants.

**Table GPHM.6.1. Baseline and Postbaseline Definitions in Lead-in Period**

| Population                | Analysis Type                          | Baseline                                                                                                                                         | Postbaseline                                                                                                                      |
|---------------------------|----------------------------------------|--------------------------------------------------------------------------------------------------------------------------------------------------|-----------------------------------------------------------------------------------------------------------------------------------|
| All enrolled participants | 1.1) Treatment-emergent adverse events | The baseline period is defined as the start of screening and ends prior to the intensive lifestyle modification program (typically at Week -12). | Starts after the first visit of the intensive lifestyle modification program and ends prior to the first dose of study treatment. |

| Population                | Analysis Type                                                                                       | Baseline                                                                                                            | Postbaseline                                                                                                                                           |
|---------------------------|-----------------------------------------------------------------------------------------------------|---------------------------------------------------------------------------------------------------------------------|--------------------------------------------------------------------------------------------------------------------------------------------------------|
| All enrolled participants | 1.2) Treatment-emergent abnormal labs, vital signs, and ECGs.                                       | Baseline will include all scheduled and unscheduled measurements during the baseline period as defined above (1.1). | Postbaseline will be defined as above (1.1). All scheduled and unscheduled measurements will be included.                                              |
| All enrolled participants | 1.3) Change from last baseline to Week xx and to last postbaseline for labs, vital signs, and ECGs. | The last scheduled and unscheduled nonmissing assessment recorded during the baseline period defined above (1.1)    | Postbaseline will be defined as above (1.1). Only scheduled visits will be included. The early discontinuation visits are considered scheduled visits. |
| All enrolled participants | Other outcomes (efficacy, PROs, questionnaires, etc.)                                               | Baseline is defined as the last nonmissing data collected prior to or at study entry (Week -12).                    | Postbaseline is defined as data collected after the study entry (Week -12) and prior to or at randomization (Week 0)                                   |

Abbreviations: ECG = electrocardiogram; PRO = patient-reported outcome.

#### 6.4.2. Patient Characteristics

A summary table will be generated for participant demographics and baseline disease characteristics for the enrolled population. Variables to be included (but not limited to) are age, sex, race, ethnicity, weight, BMI, waist circumference, age groups, and BMI groups.

#### 6.4.3. Disposition

Summaries of study disposition will be provided for the intensive lifestyle modification lead-in period. A listing may also be provided if necessary.

The lead-in period completion status is defined at the end of 12-week intensive lifestyle modification lead-in period (when all enrolled participants complete or discontinue the lead-in period). Participants with a nonmissing body weight measurement at Week 0 (Visit 10) will be considered as completers; otherwise, they will be considered as noncompleters.

#### 6.4.4. Medical History, Preexisting Conditions, and Concomitant Medications

Medical history, preexisting conditions, and concomitant medications will be summarized by PTs by decreasing frequency for all enrolled participants.

#### 6.4.5. Adverse Events

For the intensive lifestyle modification lead-in period, a TEAE is defined as an event, based upon an MedDRA LLT, that first occurred or worsened in severity after baseline of the lead-in period.

Treatment-emergent AEs, common TEAEs, deaths, SAEs, and significant AEs will be summarized for all enrolled participants in a similar way to Section 4.6.2 without treatment comparison.

#### **6.4.6. Additional Safety Assessments**

Vital signs, ECG parameters and clinical laboratory results will be summarized for all enrolled participants using categorical analysis in a similar way to Section 4.6.3 without treatment comparison.

#### **6.4.7. Important Protocol Deviations**

Important protocol deviations are identified in the TIMP. A summary of important protocol deviations may be provided at the end of the 12-week intervention (for all enrolled participants), if deemed necessary.

### **6.5. Appendix 5: Clinical Trial Registry Analyses**

Additional analyses will be performed for the purpose of fulfilling the Clinical Trial Registry (CTR) requirements.

Analyses provided for the CTR requirements include the following:

- Summary tables of AEs for the lead-in period and the double-blind period, provided as datasets that will be converted to XML files. For the lead-in period, SAEs and ‘other’ nonserious AEs are summarized by MedDRA PT. For the double-blind period, they are summarized by treatment group and MedDRA PT.
  - An AE is considered ‘Serious’ whether or not it is a TEAE.
  - An AE is considered in the ‘Other’ category if it is both a TEAE and is not serious. For each SAE and ‘Other’ AE, for each term and treatment group, the following are provided:
    - the number of participants at risk of an event
    - the number of participants who experienced each event term, and
    - the number of events experienced.
  - For each SAE, these additional terms are provided for EudraCT:
    - the total number of occurrences causally related to treatment
    - the total number of deaths, and
    - the total number of deaths causally related to treatment.

A demographic table including the following age ranges is required by EudraCT:

- 18 to 65 years
- 65 to 85 years, and
- 85 years and over.

### **6.6. Appendix 6: Exceptional Circumstances Impact**

This section lists additional statistical analyses that may be performed at final database lock to assess the impact of exceptional circumstances if the data warrants.



**6.6.1. General Considerations**

Percentage and count of randomized participants who followed the exceptional circumstances mitigation plan may be summarized by treatment group. This includes, but is not limited to, participants rescreened, procedures conducted via remote visit or mobile home health visit, visits occurred using the extended visit windows, alternative way of investigator product shipment/dispensing, use of a local lab, and so on.

Percentage and count of randomized participants who completely missed at least 1 study visit due to exceptional circumstances may also be summarized.

Similar summaries during the intensive lifestyle modification lead-in period may also be provided for all enrolled participants.

**6.6.2. Exposure**

A listing of randomized participants who had the study drug temporarily interrupted due to exceptional circumstances may be provided.

**6.6.3. Protocol Deviations**

Percentage and count of randomized participants having important protocol deviations related to exceptional circumstances will be summarized by treatment.

Percentage and count of randomized participants with protocol deviation and mitigation related to exceptional circumstances may also be summarized by treatment.

A listing of all randomized participants who had protocol deviation and mitigation due to exceptional circumstances may be provided.

Similar summaries during the intensive lifestyle modification lead-in period may also be provided for all enrolled participants.

**6.6.4. Patient Disposition**

A summary table for all randomized participants that discontinue the study or study treatment due to exceptional circumstances will be provided by treatment. A similar summary during the intensive lifestyle modification lead-in period may also be provided for all enrolled participants.

A listing of enrolled participants who discontinued the study or study treatment due to exceptional circumstances will be provided with information to indicate if a participant is randomized (along with randomized treatment) and if events occur postrandomization.

**6.6.5. Adverse Events**

A listing of all enrolled participants who had COVID-19 infection, including deaths due to COVID-19, will be provided with information to indicate if a participant is randomized (along with randomized treatment), and if events occur post-randomization.

**6.6.6. Major Depressive Disorder/Suicidal Ideation**

The counts and percentages of participants with TEAEs for major depression may be summarized by treatment group using MedDRA PT nested within SMQ by subgroup impacted

by exceptional circumstances (that is, participants without impact versus with impact) for the SS group.

The suicidal ideation and behavior solicited through C-SSRS may be summarized by treatment group by subgroup impacted by exceptional circumstances (that is, participants without impact vs with impact) for the SS group.

Similar summaries during the intensive lifestyle modification lead-in period may also be provided for all enrolled participants.

#### **6.6.7. Local Laboratory Measurements**

Local laboratory measurements due to exceptional circumstances will not be brought into the Lilly database at the time of primary database lock and final database lock per data collection system in Study GPHM, even though the local laboratory is one of the options in exceptional circumstances. Therefore, this section is not applicable for analysis purposes.

#### **6.6.8. Missing Data Due to Exceptional Circumstances**

For the primary endpoints and key secondary endpoints, missing data due to exceptional circumstances will be handled as described in Section [4.3.2.3](#).

### **6.7. Appendix 7: Searching Criteria for Special Safety Topics**

#### **Pancreatitis Events**

Determination of investigator-reported events will be through the Acute pancreatitis SMQ (20000022, narrow scope) and a Pancreatitis Chronic PT search of the AE database, while adjudication-confirmed pancreatitis events are found from adjudication forms.

#### **Malignancies**

The malignancy events will be identified using the MedDRA PT contained in the Malignant tumours SMQ (20000194) narrow scope or Tumours of unspecified malignancy SMQ (20000195) narrow scope.

#### **Arrhythmias and Cardiac Conduction Disorders**

The cardiovascular events will include clinically relevant rhythm and conduction disorders. The treatment-emergent arrhythmias and cardiac conduction disorders events will be identified using the MedDRA PT contained in any of the following SMQs:

- 1) Arrhythmias
  - For symptoms - Arrhythmia related investigations, signs and symptoms SMQ (20000051), narrow and broad terms.
  - For supraventricular arrhythmias - Cardiac arrhythmia SMQ, under the tachyarrhythmia sub-SMQ.
    - Supraventricular tachyarrhythmia SMQ (20000057), broad and narrow terms

- Tachyarrhythmia terms, nonspecific SMQ (20000164), narrow terms only, and
  - Ventricular tachyarrhythmia SMQ (20000058), narrow terms only.
- 2) Cardiac Conduction Disorders
- Conduction defects SMQ (20000056), narrow terms only, and
  - Cardiac conduction disorders High-Level Term (HLT; 10000032), all PTs.

### **Injection Site Reactions**

Treatment-emergent ISRs will be identified using the MedDRA PT in any of the following

- MedDRA HLT of Injection site reaction
- HLT of Administration site reaction, and
- HLT of Infusion site reactions.

### **Acute Gallbladder Disease**

All events of TEAE biliary colic, cholecystitis, or other suspected events related to gallbladder disease will be identified by PTs under following SMQs:

- narrow PTs in the Gallbladder related disorders SMQ (20000124)
- narrow PTs in the Biliary tract disorders SMQ (20000125), and
- narrow PTs in the Gallstone related disorders SMQ (20000127).

### **Hepatic Events**

Treatment-emergent, potentially drug-related hepatic events will be identified using MedDRA PTs contained in any of the following SMQs:

- broad and narrow terms in the Liver related investigations, signs and symptoms SMQ (20000008)
- broad and narrow terms in the Cholestasis and jaundice of hepatic origin SMQ (20000009)
- broad and narrow terms in the Hepatitis non-infections SMQ (20000010)
- broad and narrow terms in the Hepatic failure, fibrosis and cirrhosis and other liver damage SMQ (20000013), and
- narrow terms in the Liver-related coagulation and bleeding disturbances SMQ (20000015).

### **Major Depressive Disorder/Suicidal Ideation**

Adverse events will be searched using MedDRA PTs from the Depression and suicide/self-injury SMQ as defined in MedDRA (SMQs: 20000037 [Suicide/self-injury] and 20000167 [Depression (excl suicide and self-injury)]).

## 7. References

- [ADA] American Diabetes Association. Glycemic targets: standards of medical care in diabetes-2020. *Diabetes Care*. 2020(suppl 1): S66–S76. <https://doi.org/10.2337/dc20-S006>
- [ICH] International Council for Harmonisation. Addendum on estimands and sensitivity analysis in clinical trials. To the guideline principles for clinical trials E9(R1): guidance for industry. November 2019. Accessed August 31, 2022. [https://www.gmp-compliance.org/files/guidemgr/E9-R1\\_Step4\\_Guideline\\_2019\\_1203.pdf](https://www.gmp-compliance.org/files/guidemgr/E9-R1_Step4_Guideline_2019_1203.pdf)
- Ge M, Durham LK, Meyer DR. Covariate-adjusted difference in proportions from clinical trials using logistic regression and weighted risk differences. *Drug Inf J*. 2011;45(4):481-493. <https://doi.org/10.1177/009286151104500409>
- Kolotkin RL, Crosby RD, Williams GR. Health-related quality of life varies among obese subgroups. *Obes Res*. 2002;10(8):748-756. <https://doi.org/10.1038/oby.2002.102>
- Qu Y, Dai B. Return-to-baseline multiple imputation for missing values in clinical trials. *Pharm Stat*. 2022;21:641-653. <https://doi.org/10.1002/pst.2191>
- Rubin DB. *Multiple Imputation for Nonresponse in Surveys*. John Wiley & Sons Inc.; 1987.

Signature Page for VV-CLIN-076448 v1.0

|          |                                                             |
|----------|-------------------------------------------------------------|
| Approval | <b>PPD</b><br>Statistician<br>03-Feb-2023 19:44:23 GMT+0000 |
|----------|-------------------------------------------------------------|

Signature Page for VV-CLIN-076448 v1.0
